# Supplementary material for: Visually induced changes in cytokine production in the chick choroid
Source: eLife. 2021 Oct 5;10:e70608. doi: 10.7554/eLife.70608 (PMC8612705; doi:10.7554/eLife.70608)
Supplement: Figure 2—figure supplement 1—source data 1. [file elife-70608-fig2-figsupp1-data1.xlsx]

## Sheet: Figure 2 – figure supplement 1
Figure 2 – figure supplement 1. Refractions of form-deprived and untreated contralateral control eyes
Control (Left) Eyes (D)	Form-Deprived (Right) Eyes (D)
2.34	-7.81
1.82	-7.277
2.71	-10.741
2.55	-7.57
2.9	-7.434
2.4	-8.1
