# Supplementary material for: Visually induced changes in cytokine production in the chick choroid
Source: eLife. 2021 Oct 5;10:e70608. doi: 10.7554/eLife.70608 (PMC8612705; doi:10.7554/eLife.70608)
Supplement: Figure 2—source data 1. [file elife-70608-fig2-data1.xlsx]

## Sheet: Sheet1
Column ID	Entrez Gene	Gene Symbol	Gene Title	RefSeq Transcript ID	p-value(Treatment)	p-value(Recovery Tx vs. Normal)	Ratio(Recovery Tx vs. Normal)	Fold-Change(Recovery Tx vs. Normal)	F(Treatment)	F(Noise)
Gga.2769.1.S1_at	395337	IL6	interleukin 6 (interferon, beta 2)	NM_204628	0.00147067	0.000839781	10.8325	10.8325	6.60859	1
GgaAffx.21413.1.S1_s_at	---	---	---	---	4.27944e-05	1.61561e-05	10.6332	10.6332	11.8386	1
GgaAffx.1849.2.S1_s_at	416208	STC2	stanniocalcin 2	XM_414534	0.000918556	0.000163688	5.43753	5.43753	7.20582	1
GgaAffx.1849.1.S1_at	416208	STC2	stanniocalcin 2	XM_414534	0.00221498	0.000436222	5.22421	5.22421	6.1102	1
GgaAffx.2781.1.S1_at	428832	LOC428832	similar to cytochrome P450 1C1	XM_001233594	0.0147487	0.0412293	5.08611	5.08611	4.03345	1
Gga.18334.1.S1_at	---	---	---	---	0.00517733	0.002371	4.89694	4.89694	5.13577	1
Gga.5101.1.S1_at	419759	ZBTB16	zinc finger and BTB domain containing 16	XM_417898	0.00097507	0.000239156	4.69126	4.69126	7.12857	1
Gga.19230.1.S1_s_at	424243	EAF2	ELL associated factor 2	NM_001006525	0.00830413	0.0103863	4.28659	4.28659	4.62552	1
Gga.915.1.S1_at	395299	SOCS3	suppressor of cytokine signaling 3	NM_204600	0.0013031	0.00155067	4.14435	4.14435	6.75955	1
Gga.11496.1.S1_at	---	SELE	PREDICTED: Gallus gallus selectin E (endothelial adhesion molecule 1) (SELE), mRNA.	XM_422246	0.00816477	0.00444282	4.02495	4.02495	4.64343	1
GgaAffx.22637.1.S1_s_at	421186	FKBP5	FK506 binding protein 5	NM_001005431	0.000416346	0.000114732	4.0228	4.0228	8.27258	1
Gga.11642.1.S1_at	---	---	MADCAM1	---	0.00118754	0.000473503	4.00004	4.00004	6.87661	1
Gga.4750.1.S1_s_at	421186	FKBP5	FK506 binding protein 5	NM_001005431	0.000986662	0.000324733	3.98925	3.98925	7.11333	1
GgaAffx.23512.1.S1_s_at	424710	DEPDC1	DEP domain containing 1	NM_001012928	0.0116737	0.00233581	3.93808	3.93808	4.27087	1
GgaAffx.12086.1.S1_at	421186	FKBP5	FK506 binding protein 5	NM_001005431	0.000216212	6.09257e-05	3.89664	3.89664	9.21982	1
Gga.11619.1.S1_at	424710	DEPDC1	DEP domain containing 1	NM_001012928	0.00452812	0.00100289	3.85572	3.85572	5.2845	1
Gga.9972.1.S1_at	416507	RASD1	RAS, dexamethasone-induced 1	NM_001044636	0.000666023	7.46179e-05	3.54286	3.54286	7.62945	1
Gga.7228.1.S1_at	420928	CMBL	carboxymethylenebutenolidase homolog (Pseudomonas)	XM_001231950 /// XM_001231973 /// XM_419013	0.000160765	0.000534716	3.4733	3.4733	9.6684	1
Gga.10040.2.S1_at	---	---	---	---	7.85026e-06	6.17082e-07	3.37626	3.37626	15.0662	1
GgaAffx.26231.1.S1_at	---	---	---	---	0.0132719	0.0379064	3.28631	3.28631	4.13999	1
GgaAffx.4586.1.S1_at	420479	MAP3K8	mitogen-activated protein kinase kinase kinase 8	XM_418581	0.00326658	0.00199391	3.25994	3.25994	5.65479	1
Gga.120.1.S1_a_at	373895	TBX22	T-box 22	NM_204106	0.00826309	0.0223334	3.25503	3.25503	4.63076	1
Gga.8861.1.S1_at	420479	MAP3K8	mitogen-activated protein kinase kinase kinase 8	XM_418581	0.00222864	0.00070799	3.21962	3.21962	6.10287	1
Gga.475.1.S1_at	395962	FSHR	follicle stimulating hormone receptor	NM_205079	0.0341942	0.00595504	3.19715	3.19715	3.21731	1
Gga.15372.1.S1_at	---	---	---	---	0.223458	0.132363	3.19054	3.19054	1.56026	1
GgaAffx.10057.1.S1_at	418479	ADAMTS1	ADAM metallopeptidase with thrombospondin type 1 motif, 1	XM_416687	0.000471671	4.61037e-05	3.15225	3.15225	8.09894	1
Gga.951.1.S1_at	395321	TULP1	tubby like protein 1	NM_204615	0.00352773	0.00195712	3.05282	3.05282	5.56657	1
Gga.475.1.S2_at	395962	FSHR	follicle stimulating hormone receptor	NM_205079	0.0129102	0.00362837	3.01055	3.01055	4.16804	1
Gga.4285.1.S1_at	396185	CEBPB	CCAAT/enhancer binding protein (C/EBP), beta	NM_205253	0.00540842	0.00169737	3.00414	3.00414	5.08769	1
Gga.14228.1.S1_at	---	---	---	---	0.022099	0.0146858	2.94976	2.94976	3.6339	1
GgaAffx.6470.1.S1_at	420576	COL28A1	collagen, type XXVIII, alpha 1	XM_418677	0.0138393	0.00101547	2.91085	2.91085	4.0976	1
Gga.12904.1.S1_at	416438	NPTX2	neuronal pentraxin II	XM_414750	0.000625425	0.00153393	2.90285	2.90285	7.71387	1
Gga.4401.1.S1_a_at	396451	PTGS2	prostaglandin-endoperoxide synthase 2 (prostaglandin G/H synthase and cyclooxyge	NM_001167718 /// NM_001167719 /// XM_001231378 /// XM_422297	0.00420408	0.000398051	2.85052	2.85052	5.36771	1
Gga.14469.1.S1_at	---	---	---	---	6.95331e-05	0.000573376	2.82933	2.82933	11.0098	1
Gga.16274.3.S1_a_at	---	---	---	---	0.000137185	1.79389e-05	2.72886	2.72886	9.91389	1
Gga.9052.1.S1_at	768655	LOC768655	similar to pim-3 protein	XR_026638	0.00081543	0.000174934	2.72355	2.72355	7.36123	1
Gga.12614.2.S1_s_at	417247	TNFSF15	tumor necrosis factor (ligand) superfamily, member 15	NM_001024578	0.00294173	0.0256947	2.67368	2.67368	5.77595	1
Gga.11650.2.S1_at	769120	GCNT7	glucosaminyl (N-acetyl) transferase family member 7	XM_001231952	0.000980161	0.000125691	2.63698	2.63698	7.12185	1
Gga.10040.1.S1_at	---	---	---	---	6.06972e-06	6.197e-07	2.63228	2.63228	15.6048	1
Gga.9307.1.S1_at	416438	NPTX2	neuronal pentraxin II	XM_414750	0.00287762	0.00472098	2.63178	2.63178	5.80159	1
GgaAffx.11124.2.S1_at	419080	LOC419080	similar to olfactory receptor Olr62	XM_417272	0.00974182	0.00133308	2.59676	2.59676	4.45792	1
Gga.16444.1.S1_at	420570	PDK4	pyruvate dehydrogenase kinase, isozyme 4	XM_418671	0.0611753	0.05823	2.57486	2.57486	2.68355	1
Gga.5627.1.S1_at	426846	LIPG	Lipase, endothelial	XM_424455	6.96104e-05	3.48099e-05	2.54148	2.54148	11.008	1
GgaAffx.26023.5.S1_s_at	408040	KRT15	keratin 15	NM_001001312	0.000343697	0.00147503	2.53102	2.53102	8.54358	1
Gga.10928.1.S1_at	423788	CH25H	cholesterol 25-hydroxylase	XM_421660	0.00135758	0.00324831	2.52202	2.52202	6.70824	1
GgaAffx.9422.2.S1_s_at	427183	PTGER4	prostaglandin E receptor 4 (subtype EP4)	NM_001081503 /// XM_424770	0.00729014	0.00770892	2.46418	2.46418	4.764	1
GgaAffx.7915.1.S1_s_at	424312	RND3	Rho family GTPase 3	XM_422158	9.33308e-05	4.13413e-05	2.45028	2.45028	10.5261	1
GgaAffx.9422.1.S1_at	427183	PTGER4	prostaglandin E receptor 4 (subtype EP4)	NM_001081503 /// XM_424770	0.00161045	0.0040417	2.4494	2.4494	6.49643	1
GgaAffx.26125.3.S1_s_at	417435	SLC16A6	solute carrier family 16, member 6 (monocarboxylic acid transporter 7)	XM_415687	0.00108731	0.00103317	2.44916	2.44916	6.98873	1
GgaAffx.12288.1.S1_s_at	420706	TGM4	transglutaminase 4 (prostate)	NM_001006368	0.110735	0.067096	2.4284	2.4284	2.16032	1
Gga.2200.1.S1_at	429089	CYR61	cysteine-rich, angiogenic inducer, 61	NM_001031563	0.0462358	0.00480955	2.4138	2.4138	2.93762	1
GgaAffx.12842.1.S1_s_at	418812	IRG1	immunoresponsive 1 homolog (mouse)	NM_001030821	0.00677909	0.00170981	2.40867	2.40867	4.84199	1
Gga.12544.1.S1_at	417398	TMEM100	transmembrane protein 100	XM_001232986 /// XM_415651	5.42698e-05	7.13447e-05	2.38344	2.38344	11.428	1
Gga.6220.1.S1_a_at	378903	ICER	ICER protein	NM_204387	0.00247544	0.01708	2.37085	2.37085	5.97818	1
Gga.18351.1.A1_at	426312	SULF1	sulfatase 1	XR_026877	0.0348592	0.0307583	2.34393	2.34393	3.19926	1
Gga.12614.1.S1_at	417247	TNFSF15	tumor necrosis factor (ligand) superfamily, member 15	NM_001024578	0.00231631	0.0241152	2.31583	2.31583	6.05692	1
Gga.10625.1.S1_at	---	---	---	---	0.0376468	0.0134448	2.30172	2.30172	3.12743	1
Gga.2680.1.S1_at	420384	AQP1	aquaporin 1 (Colton blood group)	NM_001039453	0.0114595	0.0444631	2.27088	2.27088	4.28988	1
Gga.3972.1.S1_at	396332	SEMA3D	sema domain, immunoglobulin domain (Ig), short basic domain, secreted, (semaphor	NM_205373	0.00341103	0.000713211	2.25108	2.25108	5.60508	1
Gga.8296.2.S1_a_at	424241	LOC424241	hypothetical LOC424241	XM_422090	0.138474	0.080891	2.24812	2.24812	1.96762	1
GgaAffx.25575.1.S1_at	420104	SBNO2	strawberry notch homolog 2 (Drosophila)	XM_418225	0.00208193	0.000403945	2.2338	2.2338	6.18436	1
Gga.14878.1.S1_at	---	---	---	---	0.0411186	0.0919686	2.23274	2.23274	3.0456	1
Gga.3391.1.S1_at	408040	KRT15	keratin 15	NM_001001312	0.000381338	0.00177152	2.23266	2.23266	8.39609	1
Gga.6220.2.S1_a_at	---	---	---	---	0.0027063	0.0122244	2.22009	2.22009	5.87329	1
Gga.5376.2.S1_a_at	---	---	---	---	0.00892375	0.00421735	2.20639	2.20639	4.54969	1
GgaAffx.21358.1.S1_s_at	419125	SAMHD1	SAM domain and HD domain 1	NM_001030845	0.00578068	0.00157763	2.20572	2.20572	5.01476	1
Gga.15936.1.S1_at	---	---	---	---	0.000174765	0.000351166	2.19656	2.19656	9.54068	1
Gga.19206.1.S1_at	---	---	---	---	0.0263199	0.0110024	2.19009	2.19009	3.46532	1
Gga.576.1.S1_at	395968	ICOSLG	inducible T-cell co-stimulator ligand	NM_205084	0.00144369	0.00149861	2.18868	2.18868	6.63159	1
GgaAffx.20149.1.S1_s_at	---	---	---	---	0.0110842	0.00443703	2.1845	2.1845	4.32414	1
Gga.322.1.S1_at	395583	SPRY1	sprouty homolog 1, antagonist of FGF signaling (Drosophila)	NM_001097524	0.000194397	2.61506e-05	2.18256	2.18256	9.37934	1
Gga.17147.1.S1_s_at	420970	CCDC127	coiled-coil domain containing 127	NM_001031006	0.219542	0.0450464	2.17552	2.17552	1.57524	1
Gga.16100.1.S1_at	---	---	---	---	0.00244608	0.000715987	2.17206	2.17206	5.99229	1
Gga.6382.1.S1_s_at	---	---	---	---	0.00103086	0.000126011	2.15628	2.15628	7.05697	1
Gga.41.1.S1_at	395346	BCMO1	beta-carotene 15,15'-monooxygenase 1	XM_414163	0.0127234	0.000672461	2.15062	2.15062	4.18288	1
Gga.16403.1.S1_at	---	---	---	---	0.0131906	0.0726657	2.12283	2.12283	4.14622	1
Gga.729.1.S1_at	396260	LOC396260	mature avidin	NM_205320	0.634753	0.161125	2.11625	2.11625	0.648095	1
Gga.2461.1.S1_at	---	---	---	---	0.000152766	4.40288e-05	2.11531	2.11531	9.74697	1
Gga.8178.1.S1_at	425184	C16orf14	Chromosome 16 open reading frame 14	XM_422971	0.000830348	0.000406751	2.11199	2.11199	7.33746	1
Gga.6770.1.S1_at	---	---	---	---	0.230332	0.13089	2.10522	2.10522	1.53459	1
GgaAffx.21208.1.S1_s_at	---	---	---	---	2.73831e-05	9.72029e-06	2.1012	2.1012	12.6367	1
Gga.1819.2.S1_a_at	373903	DIO2	deiodinase, iodothyronine, type II	NM_204114	0.000544184	0.000649476	2.09861	2.09861	7.90246	1
Gga.10321.1.S1_a_at	548626	PTX3	pentraxin-related gene, rapidly induced by IL-1 beta	NM_001017413	0.00449384	0.144845	2.07469	2.07469	5.29299	1
GgaAffx.9310.1.S1_s_at	427123	SLC12A2	solute carrier family 12 (sodium/potassium/chloride transporters), member 2	XR_027218	0.00188891	0.00186777	2.07293	2.07293	6.30172	1
GgaAffx.21644.1.S1_at	---	---	---	---	0.000364206	0.000341472	2.07191	2.07191	8.46114	1
Gga.9899.1.S1_at	422213	SLC7A3	Solute carrier family 7 (cationic amino acid transporter, y+ system), member 3	XM_420204	0.00256582	0.0031127	2.06136	2.06136	5.93589	1
Gga.15226.1.S1_s_at	425184	C16orf14	Chromosome 16 open reading frame 14	XM_422971	0.0027574	0.000769964	2.06125	2.06125	5.8514	1
Gga.19233.1.S1_s_at	424700	PDE4B	phosphodiesterase 4B, cAMP-specific (phosphodiesterase E4 dunce homolog, Drosoph	NM_001031291	0.000192901	1.93572e-05	2.05279	2.05279	9.39099	1
GgaAffx.25575.1.S1_s_at	420104	SBNO2	strawberry notch homolog 2 (Drosophila)	XM_418225	0.0149201	0.00419875	2.04024	2.04024	4.02185	1
Gga.18958.1.S1_at	---	---	---	---	0.0754108	0.046607	2.03129	2.03129	2.49689	1
Gga.14336.1.S1_at	---	---	---	---	0.486747	0.265918	2.02121	2.02121	0.892247	1
Gga.16674.1.S1_at	427419	LOC427419	similar to myosin IIIA; deafness, autosomal recessive 30	XM_424992	0.0422143	0.00383994	2.00647	2.00647	3.0213	1
Gga.16274.2.S1_at	---	---	---	---	0.0125553	0.00131014	2.00439	2.00439	4.19643	1
Gga.16831.1.S1_at	427553	CDH8	Cadherin 8, type 2	NM_001100289 /// XM_425125	0.00545527	0.051948	2.00267	2.00267	5.07821	1
GgaAffx.25575.5.S1_s_at	420104	SBNO2	strawberry notch homolog 2 (Drosophila)	XM_418225	2.8883e-05	3.10717e-05	2.00162	2.00162	12.5395	1
Gga.11650.1.S1_at	769120	GCNT7	glucosaminyl (N-acetyl) transferase family member 7	XM_001231952	0.00432362	0.00151629	1.99721	1.99721	5.33623	1
Gga.6770.2.S1_a_at	---	---	---	---	0.358878	0.183086	1.99375	1.99375	1.15765	1
Gga.15893.1.S1_at	---	---	---	---	0.00332654	0.0135482	1.99243	1.99243	5.63387	1
Gga.16161.1.S1_at	419442	SLC25A33	solute carrier family 25, member 33	XM_417600	0.00436639	0.000279327	1.98977	1.98977	5.32519	1
GgaAffx.21429.1.S1_at	---	---	---	---	0.000633409	0.000104146	1.98065	1.98065	7.6968	1
GgaAffx.24884.1.S1_s_at	418538	PDE9A	phosphodiesterase 9A	XM_416748	0.000968212	0.000179158	1.95337	1.95337	7.13768	1
Gga.14445.1.S1_s_at	420057	SLC1A6	solute carrier family 1 (high affinity aspartate/glutamate transporter), member	XM_418178	0.00184536	0.0816441	1.95268	1.95268	6.33001	1
Gga.7526.1.S1_at	422840	HS3ST1	heparan sulfate (glucosamine) 3-O-sulfotransferase 1	XM_420786	3.90167e-05	0.000149804	1.94828	1.94828	12.0009	1
Gga.8025.1.S1_at	770495	SLC13A3	Solute carrier family 13 (sodium-dependent dicarboxylate transporter), member 3	XR_026692	0.0363064	0.117479	1.94514	1.94514	3.16123	1
Gga.12073.1.S1_a_at	420044	KRT23	keratin 23 (histone deacetylase inducible)	XM_418167	0.0334127	0.0108963	1.92728	1.92728	3.23901	1
Gga.10061.1.S1_s_at	417435	SLC16A6	solute carrier family 16, member 6 (monocarboxylic acid transporter 7)	XM_415687	0.0176196	0.00334803	1.92659	1.92659	3.85603	1
GgaAffx.4650.1.S1_s_at	424402	SELE	selectin E (endothelial adhesion molecule 1)	XM_422246	0.00103053	0.000619854	1.92385	1.92385	7.05738	1
Gga.4111.1.S1_at	417807	SLC38A2	solute carrier family 38, member 2	NM_001030741	0.00156619	0.000156177	1.92052	1.92052	6.53075	1
GgaAffx.20498.1.S1_s_at	417397	MMD	monocyte to macrophage differentiation-associated	NM_001030704	0.000315806	0.00226828	1.9153	1.9153	8.6648	1
Gga.19717.1.S1_at	---	---	---	---	0.174043	0.0344293	1.91426	1.91426	1.77236	1
GgaAffx.23017.1.S1_at	548626	PTX3	pentraxin-related gene, rapidly induced by IL-1 beta	NM_001017413	0.0106944	0.258256	1.91338	1.91338	4.36109	1
Gga.19655.1.S1_at	417385	NOTUM	notum pectinacetylesterase homolog (Drosophila)	XM_415640	0.00224218	0.00408177	1.91182	1.91182	6.09564	1
Gga.1030.1.S1_at	420332	MYC	v-myc myelocytomatosis viral oncogene homolog (avian)	NM_001030952	0.0817144	0.0175038	1.90764	1.90764	2.42593	1
GgaAffx.8765.2.S1_at	416372 /// 426962	GFPT2 /// LOC416372	glutamine-fructose-6-phosphate transaminase 2 /// hypothetical LOC416372	XM_414686 /// XM_424573	0.00827921	0.00247016	1.90646	1.90646	4.6287	1
Gga.18768.1.S1_at	---	---	---	---	0.00102191	0.000223068	1.90597	1.90597	7.06816	1
Gga.4088.1.S1_at	422287	SLITRK4	SLIT and NTRK-like family, member 4	XM_420266	0.146779	0.0785014	1.90366	1.90366	1.91772	1
Gga.8515.1.S1_at	378916	LHFPL5	lipoma HMGIC fusion partner-like 5	NM_204398	0.0079839	0.00570071	1.90343	1.90343	4.66717	1
GgaAffx.3525.1.S1_at	429084	F3	coagulation factor III (thromboplastin, tissue factor)	XM_426640	0.00495416	0.0318699	1.89859	1.89859	5.18448	1
GgaAffx.11497.1.S1_at	423723	PPIF	peptidylprolyl isomerase F	NM_001031226	0.000929181	0.00904073	1.8942	1.8942	7.19091	1
GgaAffx.4033.1.S1_at	423794	HTR7	5-hydroxytryptamine (serotonin) receptor 7 (adenylate cyclase-coupled)	NM_001174134 /// XM_421666	0.0736449	0.0406084	1.89328	1.89328	2.5179	1
Gga.16413.3.S1_at	396515	FGFR3	fibroblast growth factor receptor 3	NM_205509	4.85121e-05	0.000388343	1.89212	1.89212	11.6207	1
Gga.1727.1.S1_s_at	423723	PPIF	peptidylprolyl isomerase F	NM_001031226	0.000953142	0.00982722	1.89067	1.89067	7.15794	1
GgaAffx.22181.1.S1_at	422287	SLITRK4	SLIT and NTRK-like family, member 4	XM_420266	0.17916	0.0996346	1.89035	1.89035	1.74771	1
Gga.9692.1.S1_at	770574	LOC770574	hypothetical protein LOC770574	XM_001233074	0.389358	0.234847	1.88938	1.88938	1.08752	1
Gga.4286.1.S1_at	419076	HPX	hemopexin	XM_417267	0.45038	0.126824	1.88453	1.88453	0.960853	1
GgaAffx.4455.1.S1_at	416067	KCTD6	potassium channel tetramerisation domain containing 6	XM_414405	0.0144459	0.00354049	1.88229	1.88229	4.05433	1
Gga.18629.1.S1_at	417905	TMCC3	transmembrane and coiled-coil domain family 3	XM_416147	0.086561	0.00939357	1.87992	1.87992	2.37521	1
Gga.9002.1.S1_at	---	---	---	---	0.00622988	0.000345798	1.87952	1.87952	4.9333	1
Gga.1829.2.S1_at	---	---	---	---	0.0144013	0.00473845	1.87682	1.87682	4.05744	1
GgaAffx.3750.1.S1_at	420425	AXUD1	AXIN1 up-regulated 1	XM_418530	4.77013e-08	1.00132e-08	1.87355	1.87355	28.8053	1
Gga.17031.1.S1_s_at	427746	MR1	Major histocompatibility complex, class I-related	NM_001080867 /// XM_425320	0.35627	0.193831	1.87144	1.87144	1.1639	1
GgaAffx.13211.1.S1_s_at	420343	FBXO32	F-box protein 32	NM_001030956	0.00170108	0.00798715	1.87007	1.87007	6.42925	1
Gga.7647.2.S1_at	---	---	---	---	0.00987917	0.00131139	1.85667	1.85667	4.44334	1
Gga.8948.1.S1_s_at	426312	SULF1	sulfatase 1	XR_026877	0.0775077	0.075169	1.8493	1.8493	2.47261	1
Gga.12600.1.S1_s_at	427187	C7	complement component 7	XM_424774	0.173049	0.0495808	1.84877	1.84877	1.77723	1
GgaAffx.24832.2.S1_s_at	---	---	---	---	0.0176862	0.00123695	1.84286	1.84286	3.8523	1
Gga.15172.1.S1_at	---	---	---	---	0.00132859	0.00296201	1.84116	1.84116	6.73526	1
Gga.645.1.S1_s_at	396087	SKIL	SKI-like oncogene	NM_205174	0.000655195	0.000406865	1.83715	1.83715	7.6514	1
Gga.7920.1.S1_at	770939	C11orf52	chromosome 11 open reading frame 52	XM_001234250	0.0080283	0.00141686	1.83487	1.83487	4.66129	1
Gga.3621.1.S1_at	772289	CRYZ	crystallin, zeta (quinone reductase)	NM_001079763 /// XM_001234769	0.203358	0.0286984	1.83467	1.83467	1.64014	1
Gga.10859.1.S1_at	418020	LOC418020	similar to family with sequence similarity 20, member C; IMAGE:4942737	XM_416256	3.23576e-05	7.15645e-05	1.83189	1.83189	12.3342	1
Gga.14767.1.S1_at	---	---	---	---	0.0312057	0.127167	1.82696	1.82696	3.30339	1
Gga.13978.1.S1_s_at	378916	LHFPL5	lipoma HMGIC fusion partner-like 5	NM_204398	0.00515083	0.00314401	1.81795	1.81795	5.14143	1
Gga.3476.1.S1_at	395750	ETV6	ets variant gene 6 (TEL oncogene)	XM_423579	0.000408085	0.00860521	1.80123	1.80123	8.30067	1
Gga.8296.3.S1_a_at	424241	LOC424241	hypothetical LOC424241	XM_422090	0.0660181	0.00863601	1.79949	1.79949	2.61528	1
Gga.3301.1.S1_at	396529	ATP1B1	ATPase, Na+/K+ transporting, beta 1 polypeptide	NM_205520	0.127312	0.0546299	1.79802	1.79802	2.03984	1
Gga.645.1.S1_at	396087	SKIL	SKI-like oncogene	NM_205174	0.00229661	0.00179987	1.79666	1.79666	6.06707	1
Gga.4879.1.S1_at	395494	BMP7	bone morphogenetic protein 7	XM_417496	0.416953	0.199614	1.79598	1.79598	1.02822	1
GgaAffx.8852.1.S1_at	426320	LOC426320	hypothetical LOC426320	XM_423981	0.00489938	0.00752007	1.79543	1.79543	5.1968	1
Gga.17706.1.S1_at	770209	LOC770209	similar to LOC387763 protein	NM_001145042 /// XM_001232691	0.00161585	0.00029601	1.79521	1.79521	6.49231	1
Gga.14795.1.S1_at	---	---	---	---	0.0310826	0.00645474	1.79456	1.79456	3.30712	1
Gga.9150.1.S1_at	---	---	---	---	0.00522639	0.0145489	1.78745	1.78745	5.12537	1
Gga.1810.1.S1_at	427107	ARRDC3	Arrestin domain containing 3	XM_424699	0.000497897	0.000470211	1.78515	1.78515	8.02427	1
GgaAffx.3186.1.S1_at	423016	DRD4	dopamine receptor D4	NM_001142849 /// XM_420947	0.000708444	0.123217	1.7743	1.7743	7.54707	1
Gga.15884.1.S1_at	421589	FNDC1	fibronectin type III domain containing 1	XM_419627	0.104926	0.0454136	1.76984	1.76984	2.20709	1
Gga.643.1.S1_s_at	396083	SYT1	synaptotagmin I	NM_205171	0.443551	0.228734	1.75859	1.75859	0.974254	1
GgaAffx.9461.1.S1_at	---	---	---	---	0.000296494	0.00124051	1.75669	1.75669	8.75583	1
GgaAffx.10015.3.S1_s_at	422898	LETM1	leucine zipper-EF-hand containing transmembrane protein 1	NM_001006461	0.00150041	0.000444267	1.75513	1.75513	6.58378	1
Gga.11886.1.S1_at	768390	PDPN	podoplanin	XM_001231272 /// XM_001231315	0.000165443	8.92784e-05	1.7508	1.7508	9.6244	1
GgaAffx.8368.1.S1_s_at	418186	SLCO1C1	solute carrier organic anion transporter family, member 1C1	NM_001039097	0.0535507	0.113121	1.74316	1.74316	2.80371	1
GgaAffx.12282.1.S1_s_at	426126	MTHFD2	methylenetetrahydrofolate dehydrogenase (NADP+ dependent) 2, methenyltetrahydrof	NM_001031360	0.0122562	0.0138653	1.73972	1.73972	4.22102	1
Gga.90.1.S1_at	374137	MEOX2	mesenchyme homeobox 2	NM_001005427	0.133369	0.0205439	1.7377	1.7377	1.99986	1
Gga.16560.2.S1_s_at	395674	MCL1	myeloid cell leukemia sequence 1 (BCL2-related)	XM_001233734	0.0111872	0.00119388	1.73554	1.73554	4.31462	1
Gga.4367.1.S1_at	395674	MCL1	Myeloid cell leukemia sequence 1 (BCL2-related)	XM_001233734	0.000781829	2.79903e-05	1.73159	1.73159	7.41657	1
Gga.16560.2.S1_a_at	395674	MCL1	myeloid cell leukemia sequence 1 (BCL2-related)	XM_001233734	0.0175792	0.00299002	1.73091	1.73091	3.85831	1
Gga.3555.1.S1_at	395383	SLC16A3	solute carrier family 16, member 3 (monocarboxylic acid transporter 4)	NM_204663	0.0167646	0.0439939	1.7285	1.7285	3.90539	1
Gga.3536.1.S1_at	425961	CLEC3A	C-type lectin domain family 3, member A	XM_001232442 /// XM_423644	0.0403733	0.162233	1.71833	1.71833	3.06252	1
Gga.14911.1.S1_at	429211	OXTR	Oxytocin receptor	NM_001031569	0.347687	0.0704023	1.71654	1.71654	1.18479	1
GgaAffx.26345.1.S1_at	416507	RASD1	RAS, dexamethasone-induced 1	NM_001044636	0.0276577	0.00329309	1.71563	1.71563	3.41794	1
Gga.9892.1.S1_at	418812	IRG1	immunoresponsive 1 homolog (mouse)	NM_001030821	0.00129011	0.000326199	1.71469	1.71469	6.77212	1
Gga.12556.1.S1_at	419364	ERRFI1	ERBB receptor feedback inhibitor 1	XM_417525	0.00421667	0.00364847	1.7077	1.7077	5.36435	1
Gga.14066.1.S1_at	396515	FGFR3	Fibroblast growth factor receptor 3	NM_205509	0.00025928	0.000710411	1.70557	1.70557	8.95116	1
Gga.10973.1.S1_at	420581	ICA1	islet cell autoantigen 1, 69kDa	XM_418682	0.015252	0.00266532	1.70174	1.70174	3.99978	1
Gga.13727.1.S1_at	---	---	---	---	0.000971952	0.000499448	1.70046	1.70046	7.1327	1
Gga.6180.1.S1_at	395132	SMAD3	SMAD family member 3	NM_204475	0.000312925	9.22122e-05	1.69481	1.69481	8.67798	1
Gga.17781.1.S1_at	---	---	---	---	0.00680135	0.100176	1.69317	1.69317	4.83846	1
Gga.19248.1.S1_at	---	---	---	---	0.210757	0.0346905	1.69128	1.69128	1.60984	1
Gga.16384.1.S1_at	---	---	---	---	0.00589374	0.0779031	1.69005	1.69005	4.99362	1
GgaAffx.24832.1.S1_s_at	---	---	---	---	0.0153653	0.00105105	1.68903	1.68903	3.99236	1
Gga.2908.1.S1_at	395407	LOC395407	fibroblast growth factor receptor-like embryonic kinase	XM_414474	0.00828239	0.00205038	1.68799	1.68799	4.6283	1
Gga.4922.1.S2_at	373931	EGR1	early growth response 1	NM_204136	0.0177387	0.00791358	1.68739	1.68739	3.84937	1
GgaAffx.21289.1.S1_s_at	423867	C10orf26	chromosome 10 open reading frame 26	XM_001232451 /// XM_001232470 /// XM_421732	0.0309782	0.016963	1.68651	1.68651	3.3103	1
Gga.3350.1.S1_at	374110	PTGDS	prostaglandin D2 synthase 21kDa (brain)	NM_204259 /// XM_001234014	0.0103034	0.000867628	1.6853	1.6853	4.39965	1
Gga.7473.1.S1_at	415301	STRA6	stimulated by retinoic acid gene 6 homolog (mouse)	XM_413689	0.0133798	0.0819966	1.68439	1.68439	4.13178	1
Gga.2833.1.S1_at	395417	SIK1	salt-inducible kinase 1	NM_204682	0.00263116	0.0149907	1.68283	1.68283	5.90632	1
Gga.3972.1.S2_at	396332	SEMA3D	sema domain, immunoglobulin domain (Ig), short basic domain, secreted, (semaphor	NM_205373	0.00348166	0.00151503	1.68094	1.68094	5.5816	1
Gga.19751.1.S1_at	---	---	---	---	0.0206442	0.00524722	1.68039	1.68039	3.70024	1
GgaAffx.26278.1.S1_at	419497	PTCHD2	patched domain containing 2	XM_417651	0.0039557	0.000970605	1.67908	1.67908	5.43639	1
Gga.10683.1.S1_at	395274	FAS	Fas (TNF receptor superfamily, member 6)	XM_421659	0.000406806	6.0098e-05	1.67821	1.67821	8.30507	1
Gga.2304.1.S1_at	396494	EGFR	epidermal growth factor receptor (erythroblastic leukemia viral (v-erb-b) oncoge	NM_205497	6.96409e-05	6.43709e-05	1.67806	1.67806	11.0072	1
GgaAffx.4600.2.S1_s_at	416080	ADAMTS9	ADAM metallopeptidase with thrombospondin type 1 motif, 9	XM_414417	0.00887094	0.000635529	1.67481	1.67481	4.55593	1
Gga.8360.1.S1_at	771738	ATOH8	Atonal homolog 8 (Drosophila)	NM_001177739 /// XM_001234979	0.00495096	0.0130981	1.67467	1.67467	5.18519	1
Gga.1819.1.S1_at	373903	DIO2	deiodinase, iodothyronine, type II	NM_204114	0.000280939	0.00626542	1.67444	1.67444	8.83401	1
Gga.8043.1.S1_at	421003	C6orf32	chromosome 6 open reading frame 32	NM_001012865	0.00146274	0.0018208	1.67353	1.67353	6.6153	1
GgaAffx.25130.1.S1_s_at	418818	KLF5	Kruppel-like factor 5 (intestinal)	XM_417013	0.00724433	0.00369153	1.67311	1.67311	4.77075	1
Gga.8311.1.S1_at	423867	C10orf26	chromosome 10 open reading frame 26	XM_001232451 /// XM_001232470 /// XM_421732	0.00156178	0.00120811	1.67276	1.67276	6.53423	1
Gga.13645.1.S1_at	---	---	---	---	0.178613	0.214436	1.66991	1.66991	1.75031	1
GgaAffx.8765.3.S1_s_at	426962	GFPT2	glutamine-fructose-6-phosphate transaminase 2	XM_424573	0.0167807	0.0149301	1.66989	1.66989	3.90443	1
Gga.2346.1.S1_s_at	---	---	---	---	0.106023	0.0159788	1.66953	1.66953	2.19805	1
Gga.460.1.S1_at	395776	LHCGR	luteinizing hormone/choriogonadotropin receptor	NM_204936	0.36016	0.0779024	1.66369	1.66369	1.15459	1
GgaAffx.24534.1.S1_at	427187	C7	complement component 7	XM_424774	0.305272	0.0746898	1.66168	1.66168	1.29574	1
Gga.2758.1.S1_at	395935	VTN	vitronectin	NM_205061	0.0107389	0.0112461	1.6612	1.6612	4.3568	1
Gga.739.1.S1_at	396393	P20K	quiescence-specific protein	NM_205422	0.353248	0.173683	1.66038	1.66038	1.1712	1
Gga.10226.1.S1_at	418990	ARHGAP42	Rho GTPase activating protein 42	XM_417185	0.0770948	0.0165172	1.65842	1.65842	2.47733	1
GgaAffx.8070.1.S1_at	420854	EDN1	endothelin 1	XM_418943	0.123089	0.0624638	1.65715	1.65715	2.06889	1
GgaAffx.22234.3.S1_s_at	416080	ADAMTS9	ADAM metallopeptidase with thrombospondin type 1 motif, 9	XM_414417	0.00534787	0.000956279	1.65549	1.65549	5.10006	1
Gga.3982.1.S2_at	396361	INHBA	inhibin, beta A	NM_205396	0.0146328	0.125737	1.65392	1.65392	4.04139	1
GgaAffx.20208.1.S1_at	---	---	---	---	0.0353458	0.00553632	1.65378	1.65378	3.18629	1
Gga.4210.1.S1_at	396212	MT4	metallothionein 4	NM_205275	0.187668	0.0662114	1.65326	1.65326	1.70828	1
GgaAffx.11455.1.S1_s_at	422043	MCM3	minichromosome maintenance complex component 3	NM_001006421	0.0858636	0.0290081	1.65049	1.65049	2.38232	1
Gga.7278.1.S1_at	423456	SLC25A29	Solute carrier family 25, member 29	XM_421366	0.0213	0.0206447	1.64942	1.64942	3.66973	1
Gga.5748.1.S1_at	422219	IL13RA2	interleukin 13 receptor, alpha 2	NM_001048078	0.000784043	0.000406594	1.64594	1.64594	7.41284	1
Gga.13568.1.S1_at	418538	PDE9A	phosphodiesterase 9A	XM_416748	0.000493528	0.000636309	1.64529	1.64529	8.03641	1
Gga.13462.1.S1_at	---	---	---	---	0.208862	0.21499	1.64465	1.64465	1.6175	1
Gga.643.1.S1_at	396083	SYT1	synaptotagmin I	NM_205171	0.314347	0.299567	1.64355	1.64355	1.27081	1
Gga.7985.1.S1_at	---	---	---	---	0.00366639	0.000530279	1.64066	1.64066	5.52259	1
Gga.4587.1.S1_at	---	---	---	---	0.0140136	0.0096956	1.6401	1.6401	4.08495	1
Gga.12326.1.S1_s_at	423888	MXI1	MAX interactor 1	NM_001012911	0.0329789	0.0135495	1.63846	1.63846	3.25129	1
GgaAffx.20674.1.S1_at	---	---	---	---	0.00449104	0.00326415	1.63655	1.63655	5.29369	1
GgaAffx.8243.1.S1_at	420922 /// 776954	CTNND2 /// LOC776954	catenin (cadherin-associated protein), delta 2 (neural plakophilin-related arm-r	XM_001236442 /// XR_027019	0.000361186	0.000508577	1.6361	1.6361	8.47296	1
Gga.19501.1.S1_at	---	---	---	---	0.0365732	0.00320822	1.63567	1.63567	3.1544	1
GgaAffx.23745.1.S1_s_at	421599	QSER1	glutamine and serine rich 1	XM_419636	0.0655174	0.0323176	1.63525	1.63525	2.62208	1
GgaAffx.4377.1.S1_at	---	---	---	---	0.0165612	0.0531883	1.63421	1.63421	3.91753	1
Gga.14029.1.S1_at	423791	SLC16A12	Solute carrier family 16, member 12 (monocarboxylic acid transporter 12)	XM_421663	0.432536	0.107775	1.63236	1.63236	0.99625	1
GgaAffx.12177.1.S1_s_at	418058	MCM5	minichromosome maintenance complex component 5	NM_001006243	0.0347524	0.0192359	1.63153	1.63153	3.20213	1
Gga.4384.1.S2_s_at	374012	BIRC2	baculoviral IAP repeat-containing 2	NM_001007822	0.00015498	0.000139151	1.63105	1.63105	9.72478	1
Gga.19742.1.S1_at	423270	PLEKHH1	Pleckstrin homology domain containing, family H (with MyTH4 domain) member 1	XR_026894	0.101618	0.146675	1.63095	1.63095	2.23495	1
GgaAffx.9262.1.S1_at	770592	MT3	metallothionein 3	NM_001097538 /// XM_001232595	0.0919461	0.0910445	1.63089	1.63089	2.32228	1
Gga.3105.1.S1_at	417807	SLC38A2	solute carrier family 38, member 2	NM_001030741	0.0218923	0.00172243	1.63025	1.63025	3.64304	1
Gga.11443.1.S1_at	423867	C10orf26	chromosome 10 open reading frame 26	XM_001232451 /// XM_001232470 /// XM_421732	0.0194785	0.011323	1.62834	1.62834	3.75716	1
GgaAffx.7745.3.S1_s_at	420752	PDE1C	phosphodiesterase 1C, calmodulin-dependent 70kDa	XM_418850	0.00284552	0.00107306	1.62493	1.62493	5.81467	1
GgaAffx.10422.3.S1_at	421885	COL21A1	collagen, type XXI, alpha 1	XM_419902	0.0424234	0.00451028	1.62346	1.62346	3.01674	1
Gga.13374.1.S1_at	423932	INPP5F	inositol polyphosphate-5-phosphatase F	XM_421792	0.0035499	0.00328454	1.62145	1.62145	5.55941	1
GgaAffx.11738.1.S1_s_at	373931	EGR1	early growth response 1	NM_204136	0.182098	0.0701125	1.62113	1.62113	1.73388	1
Gga.18400.1.S1_at	---	---	---	---	0.225705	0.0555809	1.61962	1.61962	1.55178	1
GgaAffx.21105.1.S1_at	424312	RND3	Rho family GTPase 3	XM_422158	0.0179742	0.0211657	1.61845	1.61845	3.83633	1
Gga.17050.1.S1_at	427107	ARRDC3	arrestin domain containing 3	XM_424699	0.00818316	0.00885542	1.61814	1.61814	4.64105	1
Gga.13269.1.S1_at	424462	S1PR1	sphingosine-1-phosphate receptor 1	XM_001231779 /// XM_422305	0.0474047	0.00496097	1.61799	1.61799	2.91475	1
Gga.4320.1.S1_a_at	777119	LOC777119	Hypothetical protein LOC777119	XM_001236590	0.00142344	0.0248503	1.61736	1.61736	6.64915	1
Gga.15766.1.S1_at	419140	EIF6	eukaryotic translation initiation factor 6	NM_001030848	0.545791	0.126833	1.61734	1.61734	0.789187	1
Gga.2733.1.S1_at	428633	CNR1	cannabinoid receptor 1 (brain)	NM_001038652 /// XM_001233603	0.00455735	0.00486218	1.6173	1.6173	5.27731	1
Gga.1748.1.S1_at	431066	PNPLA2	Patatin-like phospholipase domain containing 2	NM_001113291 /// XM_428618	0.0538255	0.00688202	1.61642	1.61642	2.79907	1
GgaAffx.8990.1.S1_at	426151	CAPRIN1	cell cycle associated protein 1	NM_001031365	0.0701363	0.0306175	1.61586	1.61586	2.5613	1
Gga.1690.1.S1_at	---	---	---	---	0.0621649	0.00895525	1.61423	1.61423	2.66914	1
Gga.16033.1.S1_at	417998	CHAD	chondroadherin	XM_416236	0.311187	0.04848	1.61359	1.61359	1.27941	1
GgaAffx.9472.1.S1_at	427201	LOC427201	similar to Rho-guanine nucleotide exchange factor	XM_424789	0.0762074	0.0141509	1.60906	1.60906	2.48758	1
Gga.1806.1.S1_at	395567	SOUL	SOUL protein	NM_204789	0.0130588	0.354659	1.60814	1.60814	4.15642	1
GgaAffx.25095.1.S1_at	418769	ITGBL1	integrin, beta-like 1 (with EGF-like repeat domains)	XM_416966	0.552672	0.135216	1.60717	1.60717	0.777737	1
GgaAffx.7921.1.S1_at	424316	RIF1	RAP1 interacting factor homolog (yeast)	XM_422162	0.0624805	0.0080601	1.60552	1.60552	2.6646	1
GgaAffx.970.1.S1_at	---	---	---	---	0.271596	0.293436	1.60095	1.60095	1.39498	1
GgaAffx.4629.1.S1_at	771284	MKX	mohawk homeobox	XM_001233725	0.00305886	0.00175464	1.60071	1.60071	5.73065	1
Gga.10528.1.S1_a_at	771674	PROK2	Prokineticin 2	XM_001234924	0.0194176	0.271468	1.60013	1.60013	3.76023	1
Gga.17723.1.S1_at	---	---	---	---	0.000337812	0.000983897	1.59758	1.59758	8.56824	1
GgaAffx.20099.1.S1_at	428310	HSP25	heat shock protein 25	NM_001010842	0.243923	0.10219	1.59585	1.59585	1.48604	1
Gga.5560.1.S1_at	---	---	---	---	0.315359	0.060313	1.59555	1.59555	1.26808	1
Gga.5257.1.S1_at	---	---	---	---	0.00133428	0.000311339	1.59425	1.59425	6.7299	1
Gga.9639.1.S1_at	422567	HPGD	hydroxyprostaglandin dehydrogenase 15-(NAD)	XM_420526	0.416449	0.121999	1.59381	1.59381	1.02927	1
Gga.1331.2.S1_a_at	395966	TOP2B	topoisomerase (DNA) II beta 180kDa	NM_205082	0.107166	0.0604641	1.59278	1.59278	2.18874	1
Gga.11491.1.S1_at	---	---	---	---	0.0399566	0.00419859	1.59148	1.59148	3.07213	1
GgaAffx.1067.1.S1_at	427800	UTS2R	urotensin 2 receptor	XM_425371	0.00722531	0.00452527	1.58823	1.58823	4.77356	1
GgaAffx.5277.1.S1_at	423195	CHRM4	cholinergic receptor, muscarinic 4	NM_001031191	0.0540746	0.0403835	1.58805	1.58805	2.79488	1
Gga.19605.1.S1_at	---	---	---	---	0.0288275	0.00753735	1.58589	1.58589	3.3785	1
Gga.9368.1.S1_at	770238	LOC770238	similar to GC box binding protein	XM_001233570	0.000649072	0.000369114	1.58563	1.58563	7.66399	1
Gga.13009.1.S1_at	---	---	---	---	5.8577e-05	2.70965e-06	1.58539	1.58539	11.2981	1
Gga.7051.1.S1_at	---	---	---	---	0.0113728	0.00689771	1.5847	1.5847	4.29768	1
Gga.2310.1.S1_at	373901	LMO4	LIM domain only 4	NM_204112	5.6285e-05	0.00115763	1.58446	1.58446	11.3659	1
Gga.4293.1.S1_at	396498	ASL1	argininosuccinate lyase	NM_205501	0.770308	0.420076	1.58431	1.58431	0.451253	1
Gga.3672.1.S1_at	396140	ST3GAL1	ST3 beta-galactoside alpha-2,3-sialyltransferase 1	NM_205217	0.00147526	0.000188043	1.58199	1.58199	6.60473	1
Gga.265.1.S1_at	395488	MARCO	macrophage receptor with collagenous structure	NM_204736	0.374251	0.095049	1.58038	1.58038	1.12162	1
GgaAffx.7723.4.S1_s_at	771805	RRH	retinal pigment epithelium-derived rhodopsin homolog	NM_001079759 /// XM_001234118	0.0345303	0.390784	1.57984	1.57984	3.20814	1
Gga.6489.1.S1_at	417380	LOC417380	similar to Coiled-coil domain containing 57	XM_415636	0.000763011	0.00214053	1.57946	1.57946	7.44871	1
Gga.3535.1.S1_at	396082	NR2E1	nuclear receptor subfamily 2, group E, member 1	NM_205170	0.0914239	0.216355	1.5762	1.5762	2.32726	1
Gga.9935.1.S1_at	426819	DMBT1	deleted in malignant brain tumors 1	XM_424429	0.0177781	0.00388635	1.57597	1.57597	3.84717	1
GgaAffx.3598.1.S1_at	428705	LOC428705	hypothetical LOC428705	XM_426263	0.0121964	0.0316182	1.57593	1.57593	4.22602	1
Gga.2734.1.S1_at	396092	ALCAM	activated leukocyte cell adhesion molecule	NM_205179	0.00451404	0.000417543	1.57563	1.57563	5.28798	1
Gga.17094.1.S1_at	---	---	---	---	0.0809141	0.00697911	1.57537	1.57537	2.43461	1
Gga.12931.1.S1_s_at	420124	ELL	elongation factor RNA polymerase II	NM_001012847	0.00490914	0.00203543	1.57472	1.57472	5.19459	1
Gga.14330.1.S1_at	---	---	---	---	0.00937735	0.0132306	1.57245	1.57245	4.49773	1
Gga.2612.1.S1_at	395861	KRT19	keratin 19	NM_205009	0.0179349	0.0167443	1.57121	1.57121	3.83849	1
Gga.14944.1.A1_at	---	---	---	---	0.000410516	0.000205744	1.57048	1.57048	8.29234	1
Gga.14976.1.S1_at	---	---	---	---	0.159163	0.0895572	1.57027	1.57027	1.84851	1
GgaAffx.23294.1.S1_s_at	422555	WWC2	WW and C2 domain containing 2	XM_420516	0.000232651	7.07506e-06	1.56743	1.56743	9.11087	1
GgaAffx.5460.1.S1_at	---	---	---	---	0.122675	0.303931	1.567	1.567	2.0718	1
GgaAffx.10057.2.S1_s_at	418479	ADAMTS1	ADAM metallopeptidase with thrombospondin type 1 motif, 1	XM_416687	0.0137877	0.00840554	1.56625	1.56625	4.10137	1
Gga.14559.1.S1_at	---	---	---	---	0.12422	0.0144365	1.56226	1.56226	2.06101	1
GgaAffx.26694.1.S1_at	416291	ADAMTS2	ADAM metallopeptidase with thrombospondin type 1 motif, 2	XM_414611	0.180199	0.022815	1.56225	1.56225	1.74279	1
Gga.4820.1.S1_at	---	---	---	---	0.0285736	0.0140825	1.56086	1.56086	3.38691	1
Gga.11492.1.S1_at	424149	ZAK	sterile alpha motif and leucine zipper containing kinase AZK	XM_421996	0.000422059	0.000377636	1.56083	1.56083	8.25351	1
GgaAffx.3493.1.S1_at	417667	MSI2	musashi homolog 2 (Drosophila)	XM_415912	0.00232303	0.00298846	1.5602	1.5602	6.05347	1
Gga.4830.1.S2_at	395237	SFRP1	secreted frizzled-related protein 1	NM_204553	0.000283837	0.00122816	1.55997	1.55997	8.81909	1
GgaAffx.11018.1.S1_s_at	418982	MMP1	matrix metallopeptidase 1 (interstitial collagenase)	XM_417176	0.283192	0.400207	1.55947	1.55947	1.35951	1
Gga.4789.1.S1_at	422366	FAM70A	Family with sequence similarity 70, member A	XM_420338	0.0159484	0.0300575	1.55813	1.55813	3.95511	1
Gga.6162.1.S1_at	423224 /// 423225	LOC423224 /// SPTBN5	similar to beta chain spectrin /// spectrin, beta, non-erythrocytic 5	XM_421148 /// XM_421149	0.00897208	0.0492003	1.55692	1.55692	4.54402	1
Gga.14774.1.S1_at	---	---	---	---	0.149071	0.025709	1.55686	1.55686	1.90446	1
Gga.2748.1.S1_s_at	420124	ELL	elongation factor RNA polymerase II	NM_001012847	0.00278231	0.00300332	1.55662	1.55662	5.84088	1
GgaAffx.10231.1.S1_at	420253	RRM2B	ribonucleotide reductase M2 B (TP53 inducible)	XM_418364	0.427097	0.283114	1.55612	1.55612	1.00729	1
Gga.145.1.S1_at	373913	NR2C1	nuclear receptor subfamily 2, group C, member 1	NM_204124	0.612987	0.407921	1.55455	1.55455	0.681378	1
Gga.742.1.S1_at	396279	SST	somatostatin	NM_205336	0.132634	0.220925	1.55357	1.55357	2.00461	1
GgaAffx.7188.3.S1_s_at	420655	NGLY1	N-glycanase 1	NM_001030988	0.0267937	0.00509402	1.55258	1.55258	3.44825	1
GgaAffx.23733.1.S1_at	428769	NDST3	N-deacetylase/N-sulfotransferase (heparan glucosaminyl) 3	XM_426325	0.0140656	0.00215148	1.55138	1.55138	4.08122	1
GgaAffx.11681.1.S1_at	421878	PRIM2	primase, DNA, polypeptide 2 (58kDa)	NM_001012880	0.307363	0.0871727	1.55127	1.55127	1.28994	1
GgaAffx.6561.1.S1_at	425039	P2RY14	purinergic receptor P2Y, G-protein coupled, 14	XM_422841	0.0142737	0.00326947	1.55072	1.55072	4.0664	1
Gga.2612.2.S1_s_at	395861	KRT19	keratin 19	NM_205009	0.0270559	0.00660582	1.54956	1.54956	3.43894	1
Gga.7386.1.S1_at	415355	FBXO22	F-box protein 22	NM_001030545	0.0322557	0.00458586	1.54699	1.54699	3.27217	1
Gga.8296.3.S1_x_at	424241	LOC424241	hypothetical LOC424241	XM_422090	0.00659963	0.00103257	1.54581	1.54581	4.87091	1
GgaAffx.23688.1.S1_at	417972	GBE	eye-globin	NM_001008786	0.0346023	0.476635	1.54415	1.54415	3.20619	1
GgaAffx.24091.1.S1_at	420922 /// 776954	CTNND2 /// LOC776954	catenin (cadherin-associated protein), delta 2 (neural plakophilin-related arm-r	XM_001236442 /// XR_027019	0.00328699	0.00262382	1.54332	1.54332	5.64762	1
Gga.6090.2.S1_a_at	415895	NT5DC2	5'-nucleotidase domain containing 2	XM_414247	0.21853	0.0453358	1.54201	1.54201	1.57915	1
GgaAffx.8765.1.S1_at	416372 /// 426962	GFPT2 /// LOC416372	glutamine-fructose-6-phosphate transaminase 2 /// hypothetical LOC416372	XM_414686 /// XM_424573	0.0603898	0.0112087	1.5414	1.5414	2.69517	1
Gga.19264.1.S1_at	---	---	---	---	1.46226e-05	3.92649e-06	1.53983	1.53983	13.8192	1
Gga.1530.1.S1_at	---	---	---	---	0.00010336	3.77499e-05	1.53889	1.53889	10.3616	1
Gga.14571.1.S1_s_at	423079	HPS5	Hermansky-Pudlak syndrome 5	XM_421011	0.874377	0.36927	1.53836	1.53836	0.300137	1
Gga.7813.1.S1_at	428773	CFI	Complement factor I	XM_426329	0.00338259	0.0541174	1.53777	1.53777	5.61468	1
Gga.4373.1.S1_s_at	408182	CYB5R2	cytochrome b5 reductase 2	XM_420957	0.0422034	0.0126048	1.53773	1.53773	3.02154	1
Gga.17026.1.S1_at	---	---	---	---	0.217113	0.207286	1.53756	1.53756	1.58466	1
GgaAffx.3491.1.S1_at	417667	MSI2	musashi homolog 2 (Drosophila)	XM_415912	0.00657316	0.0106801	1.53683	1.53683	4.87525	1
GgaAffx.3253.1.S1_s_at	424810	ACSL3	acyl-CoA synthetase long-chain family member 3	XM_422625	0.0500002	0.0310064	1.53619	1.53619	2.86608	1
GgaAffx.26586.1.S1_s_at	422213	SLC7A3	solute carrier family 7 (cationic amino acid transporter, y+ system), member 3	XM_420204	0.0054731	0.00398858	1.53504	1.53504	5.07463	1
Gga.1812.1.S1_at	378803	TNFRSF11B	tumor necrosis factor receptor superfamily, member 11b (osteoprotegerin)	NM_001033641	0.0452562	0.00659509	1.53251	1.53251	2.95726	1
Gga.5386.1.S1_at	395096	TNFRSF6B	tumor necrosis factor receptor superfamily, member 6b, decoy	XM_417434	0.00398362	0.00336484	1.53239	1.53239	5.42844	1
Gga.9387.1.S1_at	416945	GGT1	gamma-glutamyltransferase 1	XM_415238	0.0416971	0.0525423	1.53102	1.53102	3.03268	1
Gga.9443.1.S1_s_at	428633	CNR1	cannabinoid receptor 1 (brain)	NM_001038652 /// XM_001233603	0.0557337	0.0454971	1.52828	1.52828	2.76753	1
Gga.19180.1.S1_s_at	423888	MXI1	MAX interactor 1	NM_001012911	0.00438983	0.00185467	1.52743	1.52743	5.31919	1
GgaAffx.6820.1.S1_at	772374	TMEM195	transmembrane protein 195	XM_001235520	0.0105135	0.00136582	1.52713	1.52713	4.37874	1
Gga.255.1.S1_at	395468	CCL4	chemokine (C-C motif) ligand 4	NM_204720	0.149547	0.136505	1.52519	1.52519	1.90174	1
Gga.11659.1.S1_at	416024	MGLL	monoglyceride lipase	XM_414365	0.191201	0.0601438	1.5241	1.5241	1.69245	1
GgaAffx.23076.1.S1_s_at	423308	STRN3	striatin, calmodulin binding protein 3	XM_421225	0.188976	0.0298094	1.52361	1.52361	1.70238	1
Gga.16141.1.S1_at	---	---	---	---	0.00190712	0.000159249	1.52245	1.52245	6.29009	1
Gga.11086.1.S1_at	421745	DSE	Dermatan sulfate epimerase	XM_419777	0.00352251	0.000206825	1.52215	1.52215	5.56826	1
GgaAffx.20275.1.S1_s_at	396092	ALCAM	activated leukocyte cell adhesion molecule	NM_205179	0.0496505	0.0224855	1.52115	1.52115	2.87248	1
GgaAffx.24712.1.S1_at	427313	CCDC125	coiled-coil domain containing 125	XM_424893	0.00751476	0.000597027	1.51844	1.51844	4.73159	1
GgaAffx.11525.1.S1_s_at	424910	CLDN1	claudin 1	NM_001013611	0.197633	0.0879477	1.5181	1.5181	1.66436	1
Gga.4830.1.S1_at	395237	SFRP1	secreted frizzled-related protein 1	NM_204553	0.00817888	0.0108412	1.51662	1.51662	4.6416	1
Gga.17936.1.S1_at	396332	SEMA3D	sema domain, immunoglobulin domain (Ig), short basic domain, secreted, (semaphor	NM_205373	0.0105768	0.000981735	1.51591	1.51591	4.37252	1
Gga.3076.1.S1_at	395973	KCNJ8	potassium inwardly-rectifying channel, subfamily J, member 8	XM_416431	0.266737	0.051154	1.51581	1.51581	1.41028	1
Gga.2207.1.S1_at	419126	RBL1	Retinoblastoma-like 1 (p107)	XM_417312	0.0012888	0.000969938	1.51462	1.51462	6.7734	1
GgaAffx.20790.1.S1_s_at	---	---	---	---	0.00154128	0.00443259	1.51413	1.51413	6.55054	1
Gga.13821.1.S1_at	---	---	---	---	0.0530564	0.029949	1.51317	1.51317	2.81212	1
Gga.8052.1.S1_at	---	---	---	---	0.405361	0.255384	1.51313	1.51313	1.05269	1
Gga.2529.1.S1_a_at	374136	IL1RL1	interleukin 1 receptor-like 1	NM_001024590 /// NM_001024591 /// NM_204275	0.0740592	0.0445356	1.51251	1.51251	2.51293	1
GgaAffx.8715.1.S1_s_at	430674	C10orf137	chromosome 10 open reading frame 137	XM_428227	0.094668	0.0820811	1.5124	1.5124	2.29676	1
GgaAffx.9485.1.S1_at	421068	ABHD3	abhydrolase domain containing 3	XM_419156	0.10939	0.20685	1.51195	1.51195	2.17092	1
GgaAffx.20141.1.S1_at	395191	OTX2	orthodenticle homeobox 2	NM_204520	0.0971161	0.36307	1.51175	1.51175	2.27445	1
Gga.5419.1.S1_at	424990	CLDN11	claudin 11 (oligodendrocyte transmembrane protein)	XM_422797	0.0361805	0.0505683	1.51056	1.51056	3.16447	1
Gga.19569.1.S1_at	---	---	---	---	0.0400682	0.0238537	1.51051	1.51051	3.06955	1
GgaAffx.6071.1.S1_at	428729	MFAP3L	microfibrillar-associated protein 3-like	XM_426287	0.0568916	0.05102	1.51031	1.51031	2.74894	1
Gga.13512.1.S1_at	---	---	---	---	0.0239498	0.311378	1.51022	1.51022	3.55604	1
Gga.4457.1.S1_s_at	424912	BCL6	B-cell CLL/lymphoma 6 (zinc finger protein 51)	NM_001012930	0.0163186	0.00320064	1.5094	1.5094	3.93222	1
GgaAffx.20206.1.S1_at	---	---	---	---	0.0249591	0.00607236	1.50545	1.50545	3.51627	1
Gga.1210.1.S1_at	404779	CCRN4L	CCR4 carbon catabolite repression 4-like (S. cerevisiae)	NM_001009928	0.00282035	0.000362077	1.50494	1.50494	5.82503	1
GgaAffx.23061.5.S1_s_at	422450 /// 422452	LOC422450 /// TBC1D9	similar to KIAA0882 protein /// TBC1 domain family, member 9 (with GRAM domain)	XM_001232385 /// XM_001232401 /// XM_420416	0.049573	0.035967	1.50393	1.50393	2.8739	1
Gga.105.1.S1_at	374147	BMPR2	bone morphogenetic protein receptor, type II (serine/threonine kinase)	NM_001001465	0.000405598	0.000317364	1.50307	1.50307	8.30925	1
Gga.17584.1.S1_at	---	---	---	---	0.0110751	0.00524287	1.50222	1.50222	4.32499	1
GgaAffx.1975.1.S1_at	429211	OXTR	oxytocin receptor	NM_001031569	0.324324	0.0761294	1.50197	1.50197	1.2442	1
GgaAffx.4552.1.S1_at	427678	GRIN2A	glutamate receptor, ionotropic, N-methyl D-aspartate 2A	XM_425252	0.244883	0.166172	1.50147	1.50147	1.48271	1
GgaAffx.10087.1.S1_at	421838	C6orf159	chromosome 6 open reading frame 159	XM_419859	0.00237663	0.00400657	1.50104	1.50104	6.02639	1
GgaAffx.20698.1.S1_at	419341	TSHZ2	teashirt family zinc finger 2	XM_417506	0.018631	0.0558061	1.5007	1.5007	3.80091	1
Gga.9133.1.S1_at	417536	LOC417536	Chemokine ah221	NM_001030712	0.325859	0.242089	1.50029	1.50029	1.24017	1
Gga.5548.1.S1_at	770430	NPM3	nucleophosmin/nucleoplasmin, 3	XM_001233763	0.252035	0.0555037	1.49951	1.49951	1.45832	1
Gga.2640.1.S1_at	395437	CFC1B	cripto, FRL-1, cryptic family 1B	NM_204700	0.0191975	0.0735214	1.49865	1.49865	3.77143	1
Gga.9481.1.S1_s_at	395772	LOC395772	otokeratin	NM_204932	0.00056371	0.00548575	1.49815	1.49815	7.85444	1
Gga.8302.1.S1_at	---	---	---	---	0.00935143	0.0014588	1.49793	1.49793	4.50062	1
Gga.4661.2.S1_at	429035	TUBA1C	tubulin, alpha 1c	XM_426592	0.0504101	0.00388599	1.49758	1.49758	2.85864	1
GgaAffx.9792.1.S1_at	427292	LOC427292	hypothetical LOC427292	XM_424874	0.00348469	0.000868394	1.49738	1.49738	5.58061	1
GgaAffx.25896.1.S1_s_at	395443	SLC1A3	solute carrier family 1 (glial high affinity glutamate transporter), member 3	XM_425011	0.396301	0.447766	1.49657	1.49657	1.07225	1
Gga.19275.1.A1_at	416271	MYOZ3	myozenin 3	XM_414589	0.268784	0.0413636	1.49611	1.49611	1.4038	1
Gga.3950.1.S2_at	378779	BMP2	bone morphogenetic protein 2	NM_204358	0.153463	0.0471	1.49605	1.49605	1.87964	1
GgaAffx.21787.1.S1_s_at	395164	BETA3	bHLH transcription factor beta3	NM_204503	0.0360572	0.0403944	1.49588	1.49588	3.16766	1
Gga.9850.1.S1_at	420589	ARL4A	ADP-ribosylation factor-like 4A	XM_418690	0.0214476	0.00826574	1.49508	1.49508	3.663	1
GgaAffx.2792.1.A1_at	770379	LOC770379	hypothetical protein LOC770379	XM_001233713	0.0195906	0.0973107	1.49408	1.49408	3.75153	1
Gga.15090.1.S1_s_at	419341	TSHZ2	teashirt family zinc finger 2	XM_417506	0.0315862	0.0335652	1.49262	1.49262	3.29195	1
GgaAffx.23879.1.S1_s_at	396494	EGFR	epidermal growth factor receptor (erythroblastic leukemia viral (v-erb-b) oncoge	NM_205497	0.00315616	0.00251874	1.49071	1.49071	5.69444	1
GgaAffx.4877.1.A1_at	---	---	---	---	0.0211386	0.0415533	1.49021	1.49021	3.67714	1
GgaAffx.10745.1.S1_at	418717	IL18R1	interleukin 18 receptor 1	NM_001145225 /// XM_416916	0.0674935	0.0106204	1.48958	1.48958	2.59554	1
Gga.16475.1.S1_at	---	---	---	---	0.0469664	0.0298021	1.48843	1.48843	2.92325	1
Gga.11663.1.S1_at	424409	RGS16	Regulator of G-protein signaling 16	XM_422252	0.0615185	0.386974	1.48838	1.48838	2.67853	1
GgaAffx.12027.1.S1_s_at	424576	SLC6A9	solute carrier family 6 (neurotransmitter transporter, glycine), member 9	NM_001031279	0.0722499	0.0536314	1.48662	1.48662	2.53489	1
Gga.18012.1.S1_at	---	---	---	---	0.0193332	0.0144003	1.48312	1.48312	3.76451	1
GgaAffx.8368.7.S1_s_at	418186	SLCO1C1	solute carrier organic anion transporter family, member 1C1	NM_001039097	0.137802	0.171553	1.48144	1.48144	1.97179	1
Gga.6520.1.S1_at	420045	KRT20	keratin 20	XM_418168	0.0231647	0.132077	1.48134	1.48134	3.58824	1
GgaAffx.11404.1.S1_at	423888	MXI1	MAX interactor 1	NM_001012911	0.000952173	0.00096314	1.48012	1.48012	7.15926	1
Gga.10117.2.S1_a_at	---	---	---	---	0.274577	0.137885	1.47991	1.47991	1.38572	1
Gga.13764.1.S1_at	---	---	---	---	0.110869	0.0342724	1.47986	1.47986	2.15927	1
Gga.18863.1.S1_at	---	---	---	---	0.102502	0.0516257	1.47926	1.47926	2.22741	1
Gga.5419.2.A1_at	424990	CLDN11	Claudin 11 (oligodendrocyte transmembrane protein)	XM_422797	0.00951067	0.0729236	1.47904	1.47904	4.48297	1
Gga.956.1.S1_at	395326	NFIL3	nuclear factor, interleukin 3 regulated	NM_204618	0.023883	0.00558297	1.47599	1.47599	3.55873	1
GgaAffx.25392.2.S1_s_at	415906	PFKFB4	6-phosphofructo-2-kinase/fructose-2,6-biphosphatase 4	NM_001030584 /// XM_001232887	0.00933088	0.0424631	1.47563	1.47563	4.50293	1
GgaAffx.8974.1.S1_s_at	423112 /// 768377	CHKA /// LOC768377	choline kinase alpha /// hypothetical protein LOC768377	XM_001231256 /// XM_421045	0.0353244	0.0381783	1.47538	1.47538	3.18685	1
GgaAffx.21379.1.S1_at	---	---	---	---	0.0128623	0.00714994	1.4741	1.4741	4.17182	1
Gga.13536.1.S1_s_at	419514	GFPT1	glutamine--fructose-6-phosphate transaminase 1	NM_001030882	4.73065e-05	4.12859e-05	1.4725	1.4725	11.6642	1
GgaAffx.7796.1.S1_at	430411	SLC39A8	solute carrier family 39 (zinc transporter), member 8	XM_427970	0.253019	0.199611	1.47203	1.47203	1.45502	1
Gga.11845.1.S1_at	423144	TMEM16A	transmembrane protein 16A	XM_421072	0.6472	0.312406	1.47025	1.47025	0.629352	1
Gga.10902.1.S1_at	418932	RASL11A	RAS-like, family 11, member A	XM_417126	0.121295	0.123495	1.46971	1.46971	2.08155	1
GgaAffx.1234.1.S1_at	428934	GRID1	glutamate receptor, ionotropic, delta 1	XM_426488	0.176243	0.0479476	1.46922	1.46922	1.76167	1
Gga.15981.1.S1_at	417707	NAMPT	nicotinamide phosphoribosyltransferase	NM_001030728	0.0356422	0.00759187	1.46876	1.46876	3.17848	1
Gga.14071.1.S1_at	---	---	---	---	0.000211351	0.00413222	1.46843	1.46843	9.25379	1
Gga.10787.1.S1_at	421368	BATF3	basic leucine zipper transcription factor, ATF-like 3	XM_419428	0.00970323	0.0787519	1.46763	1.46763	4.46206	1
Gga.256.1.S2_at	374049	TPD52L1	Tumor protein D52-like 1	NM_204215	0.0256557	0.0491412	1.46761	1.46761	3.48983	1
GgaAffx.26747.1.S1_s_at	415465	ADAMTSL3	ADAMTS-like 3	XM_413844	0.101511	0.0184447	1.46711	1.46711	2.23587	1
GgaAffx.20891.1.S1_at	771271	KCNE4	Potassium voltage-gated channel, Isk-related family, member 4	XM_001234562	0.0152565	0.00655038	1.46665	1.46665	3.99948	1
Gga.5856.1.S1_at	418719	SLC9A2	solute carrier family 9 (sodium/hydrogen exchanger), member 2	XM_416918	0.00795712	0.00553484	1.46655	1.46655	4.67074	1
GgaAffx.6566.1.S1_at	428741	MMRN1	multimerin 1	XM_426299	0.103117	0.0143687	1.46637	1.46637	2.22221	1
Gga.17359.1.S1_at	422895	LOC422895	hypothetical gene supported by CR390900	XM_420837	0.176589	0.259562	1.46607	1.46607	1.76	1
Gga.1481.1.S1_at	415407	PRTG	protogenin homolog (Gallus gallus)	NM_001030548	0.135061	0.0408357	1.46578	1.46578	1.98903	1
GgaAffx.10009.1.S1_at	422892	POLN	polymerase (DNA directed) nu	XM_420834	0.0137066	0.002838	1.46534	1.46534	4.10734	1
Gga.13.1.S1_s_at	374223	LEPR	leptin receptor	NM_204323	0.014871	0.0101394	1.46449	1.46449	4.02516	1
Gga.11918.1.S1_at	418432	NSUN3	NOL1/NOP2/Sun domain family, member 3	XM_416643	0.0536976	0.0118888	1.46349	1.46349	2.80123	1
Gga.826.1.S1_s_at	396495	IL8	interleukin 8	NM_205498	0.0907091	0.0586745	1.46286	1.46286	2.33414	1
Gga.8567.1.S1_at	420027	STAT3	signal transducer and activator of transcription 3 (acute-phase response factor)	NM_001030931 /// XM_001231210	0.0258049	0.0221297	1.46266	1.46266	3.48426	1
Gga.19100.1.S1_at	424747	DGKD	Diacylglycerol kinase, delta 130kDa	XM_422569	0.0608295	0.00957759	1.4625	1.4625	2.68865	1
GgaAffx.2994.1.S1_at	415594 /// 776238	DMXL2 /// LOC776238	Dmx-like 2 /// similar to rabconnectin	XM_001235770 /// XR_026957	0.0863962	0.0524225	1.46214	1.46214	2.37689	1
Gga.16930.1.S1_at	---	---	---	---	0.0402412	0.0453128	1.46158	1.46158	3.06556	1
Gga.11827.2.S1_a_at	415531	LOC415531	similar to organic solute transporter beta	XM_001231825 /// XM_413900	0.141452	0.265784	1.46092	1.46092	1.94938	1
Gga.8241.1.S1_at	421697	TCF21	transcription factor 21	XM_419734	0.134404	0.224596	1.46033	1.46033	1.99322	1
Gga.17597.1.S1_at	---	---	---	---	0.329904	0.0553383	1.45907	1.45907	1.22965	1
GgaAffx.6981.1.S1_at	---	---	---	---	0.69497	0.240479	1.45856	1.45856	0.559015	1
Gga.19208.1.S1_at	---	---	---	---	0.0770042	0.0280852	1.45784	1.45784	2.47837	1
GgaAffx.1682.2.S1_s_at	416803	GPR133	G protein-coupled receptor 133	XM_415094	0.0150312	0.00414023	1.45776	1.45776	4.0144	1
GgaAffx.23244.1.S1_at	395407	LOC395407	fibroblast growth factor receptor-like embryonic kinase	XM_414474	0.0252461	0.00285048	1.4566	1.4566	3.50528	1
GgaAffx.9657.1.S1_at	---	---	---	---	0.29664	0.0687239	1.45654	1.45654	1.32012	1
Gga.6197.1.S1_s_at	420274	TMEM74	transmembrane protein 74	XM_418386	0.00116464	0.0263838	1.45651	1.45651	6.90128	1
GgaAffx.10072.1.S1_at	771973	HTR1E	5-hydroxytryptamine (serotonin) receptor 1E	XM_001235178	0.492446	0.132839	1.45609	1.45609	0.881883	1
Gga.17632.1.S1_at	---	---	---	---	0.399264	0.0789843	1.45594	1.45594	1.06581	1
Gga.9320.1.S1_at	423045	WEE1	WEE1 homolog (S. pombe)	NM_001031181	0.0724794	0.0171829	1.45585	1.45585	2.53207	1
Gga.3950.1.S1_at	378779	BMP2	bone morphogenetic protein 2	NM_204358	0.297373	0.113261	1.45481	1.45481	1.31803	1
Gga.10213.1.S1_at	---	---	---	---	0.148137	0.093182	1.45459	1.45459	1.90984	1
Gga.19089.1.S1_at	---	---	---	---	0.0671026	0.0169197	1.45421	1.45421	2.60072	1
Gga.17391.1.S1_at	427995	PTCHD1	Patched domain containing 1	XM_425565	0.0681664	0.0396177	1.45237	1.45237	2.58668	1
GgaAffx.26094.1.S1_at	415392	LARP6	La ribonucleoprotein domain family, member 6	XM_413777	0.0813331	0.0604405	1.45212	1.45212	2.43005	1
GgaAffx.11425.1.S1_at	424256	UMPS	uridine monophosphate synthetase (orotate phosphoribosyl transferase and orotidi	NM_001031260	0.278849	0.106924	1.45202	1.45202	1.37263	1
GgaAffx.10670.1.S1_at	428667	LOC428667	similar to ophanin	XM_426225	0.121231	0.300498	1.45052	1.45052	2.08201	1
Gga.14984.1.S1_at	419209	SULF2	Sulfatase 2	XM_417386	0.087051	0.00709873	1.45014	1.45014	2.37025	1
Gga.16505.1.S1_s_at	---	---	---	---	0.0712025	0.0332644	1.44979	1.44979	2.54787	1
Gga.11764.2.S1_a_at	423003	GCHFR	GTP cyclohydrolase I feedback regulator	XM_420935	0.08587	0.292903	1.44977	1.44977	2.38226	1
Gga.18371.1.S1_s_at	415392	LARP6	La ribonucleoprotein domain family, member 6	XM_413777	0.154074	0.0467137	1.4496	1.4496	1.87625	1
GgaAffx.1574.1.S1_at	417537	LOC417537	similar to Nf2a	XM_415783	0.0212507	0.101136	1.44849	1.44849	3.67199	1
Gga.17306.1.S1_at	---	---	---	---	4.62625e-05	0.0011997	1.44831	1.44831	11.7029	1
Gga.16308.1.S1_at	---	---	---	---	0.00194369	0.000344566	1.44758	1.44758	6.26712	1
Gga.17361.1.S1_s_at	423631	RASGEF1A	RasGEF domain family, member 1A	NM_001031219	0.224901	0.0905952	1.44524	1.44524	1.55481	1
GgaAffx.22707.2.S1_s_at	---	---	---	---	0.0120863	0.00199242	1.44513	1.44513	4.2353	1
Gga.446.1.S1_at	395747	ETV4	ets variant gene 4 (E1A enhancer binding protein, E1AF)	XM_418106	0.00933111	0.00414756	1.44509	1.44509	4.5029	1
Gga.708.1.S1_x_at	396208	NFIC	nuclear factor I/C (CCAAT-binding transcription factor)	NM_205271 /// XM_001236960	0.0500694	0.0255603	1.44471	1.44471	2.86482	1
GgaAffx.21049.1.S1_at	428281	EFTUD2	elongation factor Tu GTP binding domain containing 2	NM_001031501	0.55148	0.155398	1.44457	1.44457	0.779713	1
GgaAffx.22101.1.S1_s_at	423112	CHKA	choline kinase alpha	XM_421045	0.0346344	0.0557463	1.44404	1.44404	3.20532	1
Gga.17695.1.S1_at	---	---	---	---	0.0256728	0.00283048	1.44397	1.44397	3.48919	1
Gga.11476.1.S1_at	420790	IGFBP3	insulin-like growth factor binding protein 3	NM_001101034 /// XM_418885	0.0138592	0.00369288	1.44382	1.44382	4.09615	1
GgaAffx.8702.1.S1_at	421009	ZNF516	zinc finger protein 516	XM_419095	0.00583082	0.00278546	1.44373	1.44373	5.00533	1
Gga.3253.1.S1_at	408049	CDH10	cadherin 10, type 2 (T2-cadherin)	NM_214673	0.209527	0.0514624	1.44371	1.44371	1.61481	1
GgaAffx.8787.1.S1_at	423960 /// 426270	DOCK1 /// LOC426270	dedicator of cytokinesis 1 /// similar to DOCK180 protein	XM_421819 /// XM_423933	0.00251314	0.000944222	1.44367	1.44367	5.96034	1
Gga.15728.1.S1_at	418443	RCJMB04_7f20	RCSD domain containing 1	NM_001030789	0.0230683	0.548431	1.44345	1.44345	3.59228	1
Gga.5660.1.S1_at	---	---	---	---	0.000106408	4.57294e-05	1.44332	1.44332	10.3151	1
GgaAffx.11296.1.S1_at	415568	TLE3	transducin-like enhancer of split 3 (E(sp1) homolog, Drosophila)	XR_026981	0.0382678	0.0091385	1.44312	1.44312	3.11221	1
Gga.2668.1.S1_a_at	396266	RARB	retinoic acid receptor, beta	NM_205326	0.00264647	0.000327663	1.44306	1.44306	5.89951	1
Gga.18574.1.S1_at	---	---	---	---	0.0463256	0.0164597	1.44218	1.44218	2.93584	1
Gga.7617.1.S1_at	---	---	---	---	0.000705863	0.00562229	1.44197	1.44197	7.55192	1
Gga.17979.1.S1_at	---	---	---	---	0.0321242	0.00644359	1.44144	1.44144	3.27602	1
Gga.11405.1.S1_at	423821	CCNJ	Cyclin J	XM_421691	0.0502394	0.33759	1.44141	1.44141	2.86173	1
Gga.15044.1.S1_at	---	---	---	---	0.0374981	0.00940733	1.44109	1.44109	3.13112	1
Gga.13310.1.S1_at	418150	B4GALNT3	beta-1,4-N-acetyl-galactosaminyl transferase 3	XM_416381	0.00729834	0.00134606	1.4399	1.4399	4.7628	1
GgaAffx.25453.1.S1_at	431656	LOC431656	hypothetical LOC431656	XM_429208	0.125729	0.0279242	1.43959	1.43959	2.05061	1
Gga.645.1.S2_at	396087	SKIL	SKI-like oncogene	NM_205174	0.0115646	0.0117858	1.43884	1.43884	4.2805	1
Gga.9170.1.S1_at	426747	PLA2G2E	Phospholipase A2, group IIE	XM_424364	0.00237046	0.000196936	1.4388	1.4388	6.02948	1
GgaAffx.11201.3.S1_s_at	100073346 /// 426274 /// 768669 /// 771173	LOC768669 /// TLR16 /// TLR6	similar to toll-like receptor 1 /// toll-like receptor 16 /// toll-like receptor	NM_001007488 /// NM_001081709 /// NM_001098854 /// XM_001234468 /// XR_026646	0.0796727	0.0216952	1.43819	1.43819	2.44826	1
Gga.2303.1.S1_at	396086	RAD51	RAD51 homolog (RecA homolog, E. coli) (S. cerevisiae)	NM_205173	0.324212	0.0576765	1.43807	1.43807	1.24449	1
GgaAffx.2936.1.S1_at	415774	SLC7A10	solute carrier family 7, (neutral amino acid transporter, y+ system) member 10	XM_414136	0.300947	0.210293	1.43783	1.43783	1.30787	1
Gga.8034.1.S1_at	---	---	---	---	0.011153	0.166172	1.43767	1.43767	4.31777	1
Gga.14136.1.S1_at	---	---	---	---	0.0759901	0.040189	1.43745	1.43745	2.49011	1
Gga.10583.2.S1_a_at	423588	GNPNAT1	glucosamine-phosphate N-acetyltransferase 1	XM_421476	0.00537413	0.0228781	1.43662	1.43662	5.09468	1
GgaAffx.7512.1.S1_at	---	---	---	---	0.00139231	0.000641912	1.43625	1.43625	6.67671	1
Gga.244.1.S1_at	395452	LOC395452	11-cis retinol dehydrogenase	NM_204713	0.0949446	0.133662	1.43619	1.43619	2.29421	1
Gga.2770.2.S1_s_at	421044	LOC421044	similar to Protein C18orf1	NM_001031013	0.0729977	0.0294987	1.43537	1.43537	2.52574	1
Gga.5089.1.S1_at	---	---	---	---	0.440413	0.221493	1.43532	1.43532	0.980472	1
Gga.3275.1.S1_a_at	---	---	---	---	0.00999355	0.00572367	1.43436	1.43436	4.43136	1
Gga.834.1.S1_s_at	425056	CYP17A1	cytochrome P450, family 17, subfamily A, polypeptide 1	NM_001001901	0.158193	0.0308753	1.43413	1.43413	1.85372	1
GgaAffx.20941.1.S1_s_at	424747	DGKD	diacylglycerol kinase, delta 130kDa	XM_422569	0.073242	0.0261588	1.43324	1.43324	2.52277	1
Gga.4370.2.S1_s_at	424295	MCM6	minichromosome maintenance complex component 6	NM_001006527	0.0877547	0.0542845	1.43299	1.43299	2.36318	1
GgaAffx.24638.1.S1_at	427276	HISPPD1	histidine acid phosphatase domain containing 1	XM_424859	0.0530962	0.00347488	1.43228	1.43228	2.81144	1
Gga.3665.1.S1_a_at	373927	CDH20	cadherin 20, type 2	NM_204134	0.146847	0.0494014	1.43217	1.43217	1.91732	1
Gga.17201.1.S1_at	---	---	---	---	0.166575	0.055664	1.43195	1.43195	1.8097	1
GgaAffx.24966.2.S1_s_at	---	---	---	---	0.136874	0.0670672	1.43191	1.43191	1.97759	1
GgaAffx.2139.1.S1_at	415714	DPEP2	dipeptidase 2	XM_414081	0.0500981	0.0527935	1.43062	1.43062	2.8643	1
GgaAffx.13168.1.S1_s_at	421035	SLMO1	slowmo homolog 1 (Drosophila)	NM_001031011	0.0136577	0.00523963	1.4304	1.4304	4.11096	1
Gga.6546.1.S1_at	---	---	---	---	0.301719	0.0483166	1.43033	1.43033	1.3057	1
Gga.17534.1.S1_at	---	---	---	---	0.0297527	0.00593905	1.43013	1.43013	3.34851	1
Gga.6172.1.S1_at	423932	INPP5F	inositol polyphosphate-5-phosphatase F	XM_421792	0.000386159	0.000564467	1.43002	1.43002	8.37836	1
GgaAffx.7796.1.S1_s_at	430411	SLC39A8	solute carrier family 39 (zinc transporter), member 8	XM_427970	0.0949737	0.161389	1.42953	1.42953	2.29394	1
GgaAffx.8168.1.S1_s_at	418127	SLC13A4	solute carrier family 13 (sodium/sulfate symporters), member 4	XM_416360	0.349362	0.357576	1.429	1.429	1.18067	1
Gga.8238.1.S1_at	419559	EDN2	endothelin 2	XM_417707	0.0543671	0.24514	1.42725	1.42725	2.79	1
Gga.14417.2.S1_a_at	419837	SLC41A1	Solute carrier family 41, member 1	XM_417968	0.00142067	0.000174458	1.42712	1.42712	6.65158	1
GgaAffx.7501.1.S1_at	395166	FAT4	FAT tumor suppressor homolog 4 (Drosophila)	XM_420617	0.388104	0.124355	1.42541	1.42541	1.09031	1
Gga.16758.1.S1_s_at	415527	CLPX	ClpX caseinolytic peptidase X homolog (E. coli)	NM_001030552	0.000391254	0.000516674	1.42497	1.42497	8.35988	1
GgaAffx.22012.1.S1_at	420457	LARP5	La ribonucleoprotein domain family, member 5	XM_418559	0.743861	0.229826	1.42398	1.42398	0.488849	1
GgaAffx.8640.1.S1_at	426167	AKAP8	A kinase (PRKA) anchor protein 8	XM_423831	0.146865	0.0388046	1.42384	1.42384	1.91722	1
Gga.261.3.S1_a_at	395660	PRLR	prolactin receptor	NM_204854	0.00693454	0.0987261	1.42368	1.42368	4.81761	1
Gga.17591.1.S1_at	418513	DOPEY2	Dopey family member 2	XM_001232722	0.243624	0.0692474	1.42264	1.42264	1.48707	1
Gga.4567.3.S1_a_at	416495	ATP5J2	ATP synthase, H+ transporting, mitochondrial F0 complex, subunit F2	XM_001233183 /// XM_001233196	0.12412	0.0877	1.4226	1.4226	2.0617	1
GgaAffx.11756.1.S1_at	421511	GPR137B	G protein-coupled receptor 137B	NM_001031062	0.0109619	0.00657618	1.42237	1.42237	4.33558	1
Gga.8144.2.S1_at	422366	FAM70A	family with sequence similarity 70, member A	XM_420338	0.0276102	0.0434704	1.42099	1.42099	3.41958	1
GgaAffx.20173.1.S1_s_at	422450 /// 422452	LOC422450 /// TBC1D9	similar to KIAA0882 protein /// TBC1 domain family, member 9 (with GRAM domain)	XM_001232385 /// XM_001232401 /// XM_420416	0.0910296	0.014159	1.42064	1.42064	2.33105	1
Gga.14090.1.S1_at	---	---	---	---	0.0305284	0.037918	1.42052	1.42052	3.32413	1
Gga.15716.1.S1_at	395905	EIF4G2	Eukaryotic translation initiation factor 4 gamma, 2	NM_001043349 /// NM_001099860	0.000288181	0.000148719	1.42027	1.42027	8.79704	1
Gga.16540.1.S1_s_at	423750	HELLS	helicase, lymphoid-specific	XM_421626	0.0448715	0.0250464	1.42004	1.42004	2.9651	1
Gga.12642.2.S1_a_at	424434	LOC424434	hypothetical LOC424434	XM_422276	0.206918	0.132602	1.4199	1.4199	1.62543	1
Gga.7840.1.S1_at	407088	MASP1	mannan-binding lectin serine peptidase 1 (C4/C2 activating component of Ra-react	NM_213586	0.488455	0.154811	1.41983	1.41983	0.88913	1
Gga.2464.1.S1_at	396489	GLUL	glutamate-ammonia ligase (glutamine synthetase)	NM_205493	0.185377	0.168764	1.41842	1.41842	1.71871	1
Gga.487.1.S1_at	395825	SEMA3A	sema domain, immunoglobulin domain (Ig), short basic domain, secreted, (semaphor	NM_204977	0.0183724	0.00666487	1.41679	1.41679	3.81469	1
Gga.12057.1.S1_at	422403	LRAT	lecithin retinol acyltransferase (phosphatidylcholine--retinol O-acyltransferase	XM_420371	0.144817	0.217091	1.41608	1.41608	1.92924	1
Gga.12192.1.S1_at	427446	OSMR	oncostatin M receptor	XM_425020	0.0675307	0.0219508	1.41602	1.41602	2.59504	1
Gga.16294.1.S1_a_at	426369	SEC61A2	Sec61 alpha 2 subunit (S. cerevisiae)	XM_424024	0.0597159	0.00666176	1.41583	1.41583	2.70527	1
Gga.7868.1.S1_at	---	---	---	---	0.0316148	0.00896476	1.4156	1.4156	3.29109	1
GgaAffx.21555.1.S1_s_at	420944	VWC2	von Willebrand factor C domain containing 2	XM_419028	0.086258	0.198522	1.4153	1.4153	2.37829	1
Gga.13442.1.S1_at	395511	RDX	radixin	NM_204751	0.135783	0.0350422	1.41484	1.41484	1.98446	1
GgaAffx.2058.1.S1_s_at	423669	CHUK	conserved helix-loop-helix ubiquitous kinase	NM_001012904	0.114057	0.01738	1.41472	1.41472	2.13472	1
Gga.3878.1.S1_at	374096	SMAD6	SMAD family member 6	NM_204248	0.00931588	0.0115426	1.41361	1.41361	4.50461	1
GgaAffx.25896.1.S1_at	395443	SLC1A3	solute carrier family 1 (glial high affinity glutamate transporter), member 3	XM_425011	0.562801	0.569397	1.41356	1.41356	0.761068	1
GgaAffx.25107.6.S1_s_at	418779	DOCK9	dedicator of cytokinesis 9	XM_416974	0.0602801	0.00990685	1.4135	1.4135	2.69681	1
Gga.12486.1.S1_at	420595	TSPAN13	tetraspanin 13	XM_418697	0.0966216	0.0281792	1.4132	1.4132	2.27891	1
GgaAffx.1747.1.S1_at	423638	ECD	ecdysoneless homolog (Drosophila)	XM_421522	0.0501833	0.00436286	1.41302	1.41302	2.86275	1
Gga.6180.1.S2_at	395132	SMAD3	SMAD family member 3	NM_204475	0.00913918	0.0115251	1.41253	1.41253	4.52466	1
GgaAffx.2423.1.S1_s_at	419679	MFSD2	major facilitator superfamily domain containing 2	XM_417826	0.114648	0.0345368	1.4118	1.4118	2.13025	1
Gga.3982.1.S1_at	396361	INHBA	inhibin, beta A	NM_205396	0.0170651	0.230867	1.41119	1.41119	3.88774	1
Gga.17511.1.S1_at	---	---	---	---	0.0430737	0.0204804	1.41091	1.41091	3.00272	1
Gga.476.1.S1_at	395810	TEAD3	TEA domain family member 3	XM_419267	0.245893	0.0437939	1.41069	1.41069	1.47922	1
Gga.9681.1.S1_at	421143	FAM77D	family with sequence similarity 77, member D	XM_419225	0.190233	0.0802431	1.40955	1.40955	1.69675	1
GgaAffx.12471.1.S1_s_at	421044	LOC421044	similar to Protein C18orf1	NM_001031013	0.00826099	0.0018264	1.40942	1.40942	4.63103	1
Gga.15207.1.S1_at	---	---	---	---	0.0626886	0.0710832	1.40926	1.40926	2.66162	1
GgaAffx.21653.1.S1_s_at	421992	DTNB	dystrobrevin, beta	NM_001031095	0.0183686	0.0167249	1.40924	1.40924	3.81489	1
Gga.18335.1.S1_at	---	---	---	---	0.0523718	0.0057161	1.40906	1.40906	2.82392	1
GgaAffx.3789.1.S1_at	422234	GPC4	glypican 4	XM_420222	0.0178755	0.0547326	1.40887	1.40887	3.84177	1
Gga.10652.1.S1_at	374031	NOTCH2	Notch homolog 2 (Drosophila)	XM_001233595	0.544361	0.100405	1.40783	1.40783	0.79158	1
GgaAffx.20317.1.S1_at	425455	LOC425455	hypothetical gene supported by CR353498	XM_430253	0.337968	0.10726	1.40713	1.40713	1.20903	1
Gga.985.1.S1_s_at	428310	HSP25	heat shock protein 25	NM_001010842	0.294801	0.101487	1.40609	1.40609	1.32541	1
GgaAffx.11696.1.S1_s_at	416027	MCM2	minichromosome maintenance complex component 2	NM_001006139	0.0800841	0.0707122	1.40529	1.40529	2.44371	1
Gga.14590.1.S1_s_at	416024	MGLL	Monoglyceride lipase	XM_414365	0.21365	0.0750966	1.40479	1.40479	1.59829	1
GgaAffx.25884.1.S1_at	771165	ARRDC2	arrestin domain containing 2	XM_001233359	0.538714	0.113501	1.40462	1.40462	0.801074	1
GgaAffx.6113.1.S1_at	423959	LOC423959	hypothetical LOC423959	XM_421818	0.00324891	0.00237828	1.40391	1.40391	5.66104	1
Gga.12478.1.S1_at	420076	JSRP1	junctional sarcoplasmic reticulum protein 1	XM_001232355 /// XM_429733	0.0012555	0.0129507	1.4024	1.4024	6.80633	1
GgaAffx.4562.1.S1_at	416640	CARHSP1	calcium regulated heat stable protein 1, 24kDa	XM_414938	0.0509242	0.0286148	1.40187	1.40187	2.8494	1
GgaAffx.1210.1.S1_at	426990	ROGDI	rogdi homolog (Drosophila)	XM_424594	0.0335224	0.0290114	1.40154	1.40154	3.23593	1
Gga.12229.1.S1_at	723973	CAMK4	calcium/calmodulin-dependent protein kinase IV	NM_001034813	0.031831	0.0193019	1.40151	1.40151	3.28466	1
GgaAffx.22940.1.S1_at	423935	BRWD2	bromodomain and WD repeat domain containing 2	XM_421795	0.00944931	0.00327945	1.40147	1.40147	4.48974	1
Gga.13161.1.S1_at	---	---	---	---	0.0916115	0.018753	1.40137	1.40137	2.32547	1
GgaAffx.20320.1.S1_s_at	422968	TMEM16C	transmembrane protein 16C	XM_428890	0.00172028	0.000385364	1.4013	1.4013	6.41552	1
Gga.11996.1.S1_at	418057	RASD2	RASD family, member 2	XM_416293	0.0567707	0.0371729	1.40117	1.40117	2.75087	1
Gga.13150.1.S1_at	771427	PRICKLE2	Prickle homolog 2 (Drosophila)	XM_001234703	0.00226456	0.00112234	1.40088	1.40088	6.0838	1
Gga.5575.1.S1_at	426369	SEC61A2	Sec61 alpha 2 subunit (S. cerevisiae)	XM_424024	7.91652e-05	4.19523e-05	1.40052	1.40052	10.7949	1
GgaAffx.24380.1.S1_at	418239	PRR5-ARHGAP8	PRR5-ARHGAP8 readthrough	XM_416463	0.247091	0.0595124	1.3999	1.3999	1.4751	1
Gga.1125.1.S1_s_at	417972	GBE	eye-globin	NM_001008786	0.0304624	0.554356	1.39892	1.39892	3.32618	1
GgaAffx.9598.1.S1_s_at	431605	PSIP1	PC4 and SFRS1 interacting protein 1	NM_001031610	0.00111665	0.00079595	1.39858	1.39858	6.95477	1
Gga.2668.4.S1_a_at	396266	RARB	retinoic acid receptor, beta	NM_205326	0.0437637	0.0576542	1.39842	1.39842	2.98808	1
GgaAffx.12162.1.S1_at	417792	PPHLN1	periphilin 1	NM_001030737	0.105757	0.0185532	1.39826	1.39826	2.20023	1
Gga.13255.1.S2_at	378898	DDAH1	dimethylarginine dimethylaminohydrolase 1	NM_204382	0.0904757	0.0274255	1.3977	1.3977	2.3364	1
Gga.15780.1.S1_at	416855	WDR66	WD repeat domain 66	XM_415147	0.424799	0.300755	1.39747	1.39747	1.01199	1
Gga.8920.1.S1_at	---	---	---	---	0.0312708	0.030486	1.39676	1.39676	3.30142	1
Gga.17146.1.S1_at	416024	MGLL	monoglyceride lipase	XM_414365	0.279229	0.130709	1.39631	1.39631	1.37147	1
Gga.16385.1.S1_s_at	427336	KIAA0368	KIAA0368	XM_424915	0.010993	0.00528498	1.39606	1.39606	4.33266	1
Gga.13534.1.S1_at	---	---	---	---	0.221924	0.0423361	1.39549	1.39549	1.56609	1
GgaAffx.24089.1.S1_s_at	418153	ERC1	ELKS/RAB6-interacting/CAST family member 1	XM_001235142 /// XM_416384	0.389873	0.0706431	1.39515	1.39515	1.08638	1
GgaAffx.4176.3.S1_s_at	416953	RAB36	RAB36, member RAS oncogene family	XM_415245	0.0152569	0.0125664	1.3939	1.3939	3.99945	1
GgaAffx.13042.1.S1_s_at	418066	PWP1	PWP1 homolog (S. cerevisiae)	NM_001030761	0.00644827	0.0156028	1.39386	1.39386	4.89598	1
Gga.19204.1.S1_at	---	---	---	---	0.35909	0.168056	1.39311	1.39311	1.15714	1
Gga.537.2.S1_a_at	395909	VEGFA	vascular endothelial growth factor A	NM_001110355 /// NM_205042	0.000102029	0.00872685	1.3931	1.3931	10.3824	1
Gga.12499.1.S1_at	416455	C7orf50	Chromosome 7 open reading frame 50	XM_414763	0.00457522	0.0517745	1.39304	1.39304	5.27295	1
Gga.11435.1.S1_at	427360	LOC427360	Similar to multi PDZ domain protein MUPP1	XR_026861	0.00399245	0.00800453	1.39304	1.39304	5.42594	1
Gga.1644.1.S1_a_at	416024	MGLL	Monoglyceride lipase	XM_414365	0.133857	0.0639277	1.39242	1.39242	1.99672	1
Gga.1186.2.S1_a_at	425231	ZNRF1	zinc and ring finger 1	XR_027014	0.0330796	0.00710444	1.39167	1.39167	3.24843	1
GgaAffx.26028.1.S1_at	420046	KRT222P	keratin 222 pseudogene	XM_418169	0.227596	0.0513983	1.39139	1.39139	1.54471	1
Gga.9884.1.S1_at	427250	LOC427250	similar to KIAA1412 protein	XR_027225	0.0091014	0.00119399	1.39064	1.39064	4.52901	1
Gga.17167.1.S1_at	374214	GABRA1	gamma-aminobutyric acid (GABA) A receptor, alpha 1	NM_204318	0.00998935	0.215341	1.3906	1.3906	4.4318	1
Gga.16331.1.S1_at	---	---	---	---	0.0227534	0.00775463	1.39058	1.39058	3.60559	1
Gga.17403.1.S1_at	---	---	---	---	0.00117139	0.0128355	1.39055	1.39055	6.89396	1
Gga.274.1.S1_at	395509	PDGFRA	platelet-derived growth factor receptor, alpha polypeptide	NM_204749	0.536005	0.196282	1.39047	1.39047	0.805654	1
Gga.13444.1.S1_at	---	---	---	---	0.3679	0.0669608	1.3901	1.3901	1.13634	1
GgaAffx.26344.1.S1_at	419218	ZNFX1	zinc finger, NFX1-type containing 1	XM_417395	0.23467	0.0898181	1.38958	1.38958	1.51879	1
GgaAffx.24607.4.S1_s_at	431603	ADAMTSL1	ADAMTS-like 1	XM_429157	0.0381267	0.0853	1.3893	1.3893	3.11565	1
Gga.6371.2.S1_a_at	419932	BTG2	BTG family, member 2	XM_418053	0.102863	0.0181765	1.3891	1.3891	2.22436	1
GgaAffx.9807.1.S1_at	427297	HOOK3	hook homolog 3 (Drosophila)	XR_027020	0.228828	0.0313607	1.38843	1.38843	1.54014	1
GgaAffx.21171.1.S1_s_at	419932	BTG2	BTG family, member 2	XM_418053	0.0191533	0.00752614	1.38804	1.38804	3.7737	1
GgaAffx.22012.2.S1_s_at	420457	LARP5	La ribonucleoprotein domain family, member 5	XM_418559	0.276278	0.0678994	1.38804	1.38804	1.38048	1
Gga.1587.1.A1_at	---	---	---	---	0.0537172	0.0599991	1.3875	1.3875	2.8009	1
Gga.12454.1.S1_at	427223	RLN3	relaxin 3	NM_001113200 /// XM_424810	0.00118208	0.24003	1.38734	1.38734	6.88244	1
Gga.6108.1.S1_at	---	---	---	---	0.357141	0.0647502	1.38727	1.38727	1.16181	1
GgaAffx.13152.1.A1_at	---	---	---	---	0.0178152	0.00267006	1.38653	1.38653	3.84511	1
Gga.14794.1.A1_at	---	---	---	---	0.0608351	0.0232383	1.38644	1.38644	2.68857	1
GgaAffx.8463.1.S1_at	415594 /// 776238	DMXL2 /// LOC776238	Dmx-like 2 /// similar to rabconnectin	XM_001235770 /// XR_026957	0.0196971	0.0358989	1.38642	1.38642	3.74621	1
GgaAffx.12565.1.S1_at	426048	NCLN	nicalin homolog (zebrafish)	NM_001031354	0.0158827	0.0022213	1.38545	1.38545	3.95923	1
Gga.4107.1.S1_at	374093	CRY1	cryptochrome 1 (photolyase-like)	NM_204245	0.00507531	0.00101134	1.38522	1.38522	5.15775	1
GgaAffx.26624.2.S1_s_at	427502	TRPM7	transient receptor potential cation channel, subfamily M, member 7	NM_001177555 /// XM_425074	0.000608898	0.000228167	1.38432	1.38432	7.74997	1
Gga.13106.1.S1_at	---	---	---	---	0.0480076	0.00718836	1.38427	1.38427	2.90319	1
GgaAffx.9828.1.S1_at	---	---	---	---	0.0174739	0.0113355	1.38417	1.38417	3.86426	1
Gga.10777.1.S1_s_at	423785	PGBD3	piggyBac transposable element derived 3	XM_421656	0.0462757	0.0110554	1.38394	1.38394	2.93682	1
GgaAffx.3084.1.S1_s_at	424799	COL4A4	collagen, type IV, alpha 4	XM_422615	0.0498256	0.0512997	1.38389	1.38389	2.86927	1
GgaAffx.4625.1.S1_at	423848	PPRC1	peroxisome proliferator-activated receptor gamma, coactivator-related 1	XM_421717	0.116002	0.0458459	1.38377	1.38377	2.12009	1
GgaAffx.1066.1.S1_at	427799	LOC427799	hypothetical LOC427799	XR_026968	0.0647673	0.0683366	1.3835	1.3835	2.63239	1
GgaAffx.3322.1.S1_s_at	427553	CDH8	cadherin 8, type 2	NM_001100289 /// XM_425125	0.000291266	0.00174462	1.38338	1.38338	8.78159	1
Gga.2734.1.S2_at	396092	ALCAM	activated leukocyte cell adhesion molecule	NM_205179	0.0512675	0.00344164	1.38296	1.38296	2.84329	1
Gga.10092.1.S1_at	427995	PTCHD1	patched domain containing 1	XM_425565	0.056582	0.0315723	1.38231	1.38231	2.75387	1
GgaAffx.1795.3.S1_s_at	424780	TFDP2	transcription factor Dp-2 (E2F dimerization partner 2)	NM_001184713 /// XM_422598	0.0110618	0.00113899	1.38217	1.38217	4.32622	1
GgaAffx.23739.1.S1_at	422687	ARSJ	arylsulfatase family, member J	XM_420639	0.00321467	0.00039941	1.38197	1.38197	5.67324	1
Gga.17492.1.S1_at	418431	ARL13B	ADP-ribosylation factor-like 13B	XM_416642	0.171714	0.114543	1.38177	1.38177	1.78382	1
GgaAffx.22457.1.S1_s_at	422345	ACSL4	acyl-CoA synthetase long-chain family member 4	XM_420317	0.232743	0.0883201	1.38127	1.38127	1.52577	1
GgaAffx.24739.1.S1_at	420190	JPH1	junctophilin 1	XM_418302	0.206221	0.0576541	1.38081	1.38081	1.62829	1
GgaAffx.23995.1.S1_at	420868	BMP6	bone morphogenetic protein 6	XM_418956	0.0564947	0.0734777	1.38039	1.38039	2.75527	1
Gga.11924.1.S1_at	417462	NSUN5	NOP2/Sun domain family, member 5	XM_415710	0.00847815	0.00291176	1.38036	1.38036	4.60362	1
Gga.6424.1.S1_s_at	---	---	---	---	0.0768114	0.0160308	1.38031	1.38031	2.48059	1
GgaAffx.10353.1.S1_at	418546	CRYAA	crystallin, alpha A	NM_001030797	0.712192	0.479655	1.37982	1.37982	0.534145	1
Gga.8213.1.S1_at	431499	LOC431499	similar to hypothetical protein	NM_001031606	0.291948	0.23576	1.37882	1.37882	1.33366	1
Gga.13174.1.S1_at	---	---	---	---	0.00931343	0.0478981	1.37869	1.37869	4.50488	1
Gga.9646.1.S1_at	416344	YIPF5	Yip1 domain family, member 5	XM_414661	0.262674	0.0409435	1.37824	1.37824	1.42329	1
Gga.10461.1.S1_at	421886	HMGCLL1	3-hydroxymethyl-3-methylglutaryl-Coenzyme A lyase-like 1	XM_419903	0.201145	0.0579453	1.37824	1.37824	1.64942	1
Gga.7646.1.S1_at	---	---	---	---	0.0137836	0.00686785	1.37783	1.37783	4.10168	1
Gga.5930.1.S1_at	---	---	---	---	0.0233468	0.00791169	1.3778	1.3778	3.58067	1
Gga.9967.1.S1_at	421009	ZNF516	zinc finger protein 516	XM_419095	0.00339508	0.00443738	1.37676	1.37676	5.61045	1
Gga.1186.1.S1_at	---	---	---	---	0.0186482	0.00470341	1.37632	1.37632	3.8	1
Gga.20041.1.S1_at	395454	PCSK6	proprotein convertase subtilisin/kexin type 6	XM_413892	0.115746	0.0107029	1.37592	1.37592	2.12201	1
GgaAffx.9495.1.S1_at	427207	GCNT4	glucosaminyl (N-acetyl) transferase 4, core 2 (beta-1,6-N-acetylglucosaminyltran	XM_424794	0.00777144	0.00172889	1.37583	1.37583	4.69582	1
Gga.13140.2.S1_at	426862	IVNS1ABP	influenza virus NS1A binding protein	XM_424470	0.0534554	0.00852983	1.37562	1.37562	2.80533	1
GgaAffx.12121.1.S1_at	424700	PDE4B	phosphodiesterase 4B, cAMP-specific (phosphodiesterase E4 dunce homolog, Drosoph	NM_001031291	0.0264812	0.00916962	1.37513	1.37513	3.45948	1
Gga.11132.1.S1_at	421891	LRRC1	leucine rich repeat containing 1	XM_419907	0.0593005	0.00718338	1.37454	1.37454	2.71155	1
Gga.16340.1.S1_s_at	416291	ADAMTS2	ADAM metallopeptidase with thrombospondin type 1 motif, 2	XM_414611	0.0681329	0.0109864	1.37436	1.37436	2.58712	1
GgaAffx.6894.1.S1_s_at	420606	LOC420606	similar to multidrug resistance protein 1a	XM_418707	0.123051	0.195858	1.37365	1.37365	2.06916	1
GgaAffx.9184.1.S1_at	425734	HEATR1	HEAT repeat containing 1	XM_422958	0.0242999	0.00181091	1.37319	1.37319	3.54204	1
Gga.7597.1.S1_at	---	---	---	---	1.12475e-05	2.92843e-05	1.37292	1.37292	14.3359	1
Gga.263.1.S1_at	395484	OTOR	otoraplin	NM_204732	0.366716	0.158322	1.37274	1.37274	1.13911	1
GgaAffx.25498.4.S1_s_at	416801	MMP17	matrix metallopeptidase 17 (membrane-inserted)	XM_415092	0.0238148	0.00336251	1.37272	1.37272	3.56149	1
GgaAffx.4808.1.S1_s_at	420500	ARHGAP21	Rho GTPase activating protein 21	NM_001177357 /// XM_418602	0.166495	0.0614104	1.37271	1.37271	1.81011	1
Gga.10017.1.S1_at	777533	LOC777533	hypothetical protein LOC777533	XM_001236979	0.0808288	0.0521519	1.37264	1.37264	2.43554	1
Gga.13258.1.S1_at	---	---	---	---	0.00775337	0.00476212	1.3725	1.3725	4.69829	1
GgaAffx.8074.1.S1_at	425843	ADAM12	ADAM metallopeptidase domain 12 (meltrin alpha)	NM_001142850 /// XM_423549	0.360217	0.0703295	1.37195	1.37195	1.15445	1
GgaAffx.20468.1.S1_at	416803	GPR133	G protein-coupled receptor 133	XM_415094	0.00843329	0.0024578	1.37083	1.37083	4.60922	1
Gga.1951.1.S2_at	395771	GJB6	gap junction protein, beta 6, 30kDa	NM_204931	0.47856	0.108254	1.37043	1.37043	0.90731	1
Gga.8511.1.S1_at	395097	IGF2	insulin-like growth factor 2 (somatomedin A)	NM_001030342 /// XM_421026	0.000347071	0.00780011	1.36953	1.36953	8.52965	1
GgaAffx.24297.1.S1_at	396409	PTPN2	protein tyrosine phosphatase, non-receptor type 2	XM_419126	0.00596281	0.00146586	1.36952	1.36952	4.98093	1
GgaAffx.26644.1.S1_at	427842	WSCD1	WSC domain containing 1	XM_425416	0.493778	0.138158	1.369	1.369	0.879474	1
Gga.1090.2.S1_at	---	---	---	---	0.379363	0.37076	1.36871	1.36871	1.10995	1
GgaAffx.6023.1.S1_at	417797	TWF1	twinfilin, actin-binding protein, homolog 1 (Drosophila)	NM_001030739	0.00878031	0.00562324	1.36803	1.36803	4.56673	1
Gga.7640.2.S1_at	422345	ACSL4	Acyl-CoA synthetase long-chain family member 4	XM_420317	0.045131	0.0271968	1.36728	1.36728	2.9598	1
Gga.16762.1.S1_at	417748	GPR37	G protein-coupled receptor 37 (endothelin receptor type B-like)	NM_001081699 /// XM_415992	0.132418	0.218143	1.36722	1.36722	2.00601	1
Gga.708.3.S1_a_at	396208	NFIC	nuclear factor I/C (CCAAT-binding transcription factor)	NM_205271 /// XM_001236960	0.17137	0.0509831	1.36677	1.36677	1.78553	1
Gga.6962.2.S1_s_at	421511	GPR137B	G protein-coupled receptor 137B	NM_001031062	0.0433192	0.0150655	1.3662	1.3662	2.99748	1
Gga.16054.1.S1_at	422935	PANK2	Pantothenate kinase 2 (Hallervorden-Spatz syndrome)	XM_420873	0.00357605	0.00218402	1.36619	1.36619	5.55103	1
GgaAffx.20097.1.S1_at	423619	RGR	retinal G protein coupled receptor	NM_001031216	0.138709	0.711678	1.36589	1.36589	1.96617	1
Gga.3213.1.S1_at	396142	E2F1	E2F transcription factor 1	NM_205219	0.00257399	0.00701977	1.36548	1.36548	5.93215	1
Gga.12464.1.S1_at	---	---	---	---	0.209678	0.0793807	1.36546	1.36546	1.61419	1
Gga.17872.1.S1_at	---	---	---	---	0.0359905	0.0026341	1.36497	1.36497	3.16939	1
Gga.12240.1.S1_at	415361	ACSBG1	acyl-CoA synthetase bubblegum family member 1	XM_413747	0.220182	0.269491	1.36496	1.36496	1.57277	1
Gga.9317.1.S1_at	---	---	---	---	0.0388508	0.0172864	1.36438	1.36438	3.09816	1
Gga.10765.1.S1_s_at	422846	LYAR	Ly1 antibody reactive homolog (mouse)	XM_420792	0.0736104	0.0408277	1.36343	1.36343	2.51832	1
GgaAffx.20481.1.S1_at	---	---	---	---	0.0783812	0.061903	1.36335	1.36335	2.4627	1
GgaAffx.22312.2.S1_s_at	420494	MYO3A	myosin IIIA	XM_418597	0.12414	0.383411	1.36319	1.36319	2.06156	1
GgaAffx.21175.1.S1_at	426324	LOC426324	Similar to MCTP2	XM_430381	0.314129	0.124132	1.36264	1.36264	1.2714	1
Gga.3731.2.S1_a_at	396164	HIC1	hypermethylated in cancer 1	NM_205236	0.120525	0.0369076	1.36258	1.36258	2.08705	1
GgaAffx.9429.4.A1_at	---	---	---	---	0.0270652	0.00648037	1.36255	1.36255	3.43862	1
Gga.19977.1.S1_s_at	418779	DOCK9	dedicator of cytokinesis 9	XM_416974	0.0456966	0.0400272	1.36196	1.36196	2.94837	1
GgaAffx.8868.2.S1_s_at	421052	FAM38B	family with sequence similarity 38, member B	XM_419138	0.0477384	0.0158494	1.36131	1.36131	2.90834	1
Gga.11655.1.S1_at	415633	GPR56	G protein-coupled receptor 56	XM_413999	0.0222687	0.0696376	1.36125	1.36125	3.62647	1
Gga.3330.1.S1_at	395657	SPON1	spondin 1, extracellular matrix protein	NM_204851	0.151363	0.249391	1.36103	1.36103	1.89142	1
GgaAffx.1540.1.S1_s_at	423619	RGR	retinal G protein coupled receptor	NM_001031216	0.0694054	0.658506	1.36061	1.36061	2.57063	1
GgaAffx.12922.1.S1_at	419514	GFPT1	glutamine--fructose-6-phosphate transaminase 1	NM_001030882	2.17469e-05	2.08319e-05	1.36058	1.36058	13.0626	1
Gga.6162.1.S1_s_at	423224 /// 423225	LOC423224 /// SPTBN5	similar to beta chain spectrin /// spectrin, beta, non-erythrocytic 5	XM_421148 /// XM_421149	0.0187214	0.0447055	1.36046	1.36046	3.79614	1
Gga.4632.4.S1_a_at	419895	RPL10A	ribosomal protein L10a	XM_418020	0.010018	0.00342447	1.36009	1.36009	4.42882	1
Gga.17863.1.S1_at	---	---	---	---	0.0500683	0.00861036	1.36008	1.36008	2.86484	1
Gga.10720.1.S1_at	---	---	---	---	0.129819	0.149645	1.35981	1.35981	2.02305	1
GgaAffx.25156.1.S1_s_at	418908	STARD13	StAR-related lipid transfer (START) domain containing 13	XM_417104	0.00786704	0.0175258	1.35941	1.35941	4.68282	1
GgaAffx.2722.1.S1_at	769924	GNA12	guanine nucleotide binding protein (G protein) alpha 12	XM_001233236	0.576335	0.168286	1.359	1.359	0.739124	1
Gga.19071.1.S1_a_at	425974	LOC425974	hypothetical gene supported by CR406690	XM_430346	0.0257145	0.324275	1.35886	1.35886	3.48763	1
Gga.11611.1.S1_at	417831	WIF1	WNT inhibitory factor 1	XM_416072	0.0975388	0.271159	1.35882	1.35882	2.27066	1
Gga.245.1.S1_at	395453	FGF18	fibroblast growth factor 18	NM_204714	0.547076	0.0957644	1.35864	1.35864	0.78704	1
GgaAffx.1053.1.S1_at	419999	PIP4K2B	phosphatidylinositol-5-phosphate 4-kinase, type II, beta	XM_418120	0.0068471	0.00168624	1.35863	1.35863	4.83125	1
Gga.8654.1.S1_at	424821	RBP1	retinol binding protein 1, cellular	XM_422635	0.117552	0.658473	1.35858	1.35858	2.10862	1
GgaAffx.23081.2.S1_s_at	421399	PLEKHH2	pleckstrin homology domain containing, family H (with MyTH4 domain) member 2	XM_419455	0.00505627	0.000696933	1.35858	1.35858	5.1619	1
Gga.9046.1.S1_at	417230	SLC25A25	solute carrier family 25 (mitochondrial carrier; phosphate carrier), member 25	XM_001233164 /// XM_415513	0.00530066	0.015354	1.35811	1.35811	5.10982	1
Gga.10957.1.S1_s_at	420154	UHRF1	ubiquitin-like, containing PHD and RING finger domains, 1	XM_418269	0.139691	0.0987461	1.35809	1.35809	1.96011	1
Gga.7876.1.S1_at	421462	TTC27	tetratricopeptide repeat domain 27	NM_001012567	0.0215675	0.0197631	1.35788	1.35788	3.65758	1
Gga.4768.1.S1_at	396250	ETS2	v-ets erythroblastosis virus E26 oncogene homolog 2 (avian)	NM_205312	0.0464671	0.0508663	1.35774	1.35774	2.93304	1
Gga.13992.1.S1_at	---	---	---	---	0.107722	0.0318026	1.35767	1.35767	2.18425	1
GgaAffx.23312.2.S1_s_at	772284	TMEM48	transmembrane protein 48	XM_001235441	0.233875	0.0587073	1.35759	1.35759	1.52166	1
Gga.7458.1.S1_at	---	---	---	---	0.108284	0.0423044	1.35756	1.35756	2.17973	1
GgaAffx.8256.1.S1_at	395891	CACNA1C	calcium channel, voltage-dependent, L type, alpha 1C subunit	XM_416388	0.0306599	0.00914671	1.35747	1.35747	3.32006	1
Gga.17916.1.S1_at	---	---	---	---	0.00525088	0.000544609	1.35717	1.35717	5.12021	1
Gga.19101.1.S1_at	---	---	---	---	0.205737	0.17796	1.35689	1.35689	1.63028	1
Gga.4729.2.S1_at	417823	RPL18A	Ribosomal protein L18a	XM_416064	0.120042	0.0413844	1.35683	1.35683	2.09052	1
Gga.2971.2.S1_at	426961	C3orf64	chromosome 3 open reading frame 64	NM_001031409	0.993598	0.691988	1.35635	1.35635	0.0564101	1
Gga.9003.1.S1_at	---	---	---	---	0.0694461	0.0237606	1.35631	1.35631	2.5701	1
Gga.2353.1.S1_at	425026	TIPARP	TCDD-inducible poly(ADP-ribose) polymerase	XM_422828	0.00298612	0.00296759	1.35614	1.35614	5.75856	1
Gga.15325.1.S1_at	---	---	---	---	0.379793	0.0712551	1.35544	1.35544	1.10897	1
Gga.14892.1.S1_at	---	---	---	---	0.219041	0.0558771	1.35542	1.35542	1.57717	1
Gga.7758.1.S1_at	423969	TCERG1L	transcription elongation regulator 1-like	XM_421827	0.147637	0.220739	1.35464	1.35464	1.91273	1
GgaAffx.21179.1.S1_at	---	---	---	---	0.000690839	0.000552821	1.3545	1.3545	7.58058	1
Gga.17478.1.S1_at	---	---	---	---	0.000528652	0.000449257	1.35439	1.35439	7.94203	1
Gga.15752.1.S1_at	418081	CHST11	carbohydrate (chondroitin 4) sulfotransferase 11	XM_416316	0.00645758	0.00943234	1.35418	1.35418	4.89442	1
Gga.13585.1.S1_at	417439	FAM20A	family with sequence similarity 20, member A	XM_415690	0.449348	0.0952178	1.35397	1.35397	0.962867	1
GgaAffx.10261.1.A1_s_at	422949	ALMS1	Alstrom syndrome 1	XM_420887	0.264017	0.0402599	1.35373	1.35373	1.41897	1
GgaAffx.26461.1.S1_at	424466	CDC14A	CDC14 cell division cycle 14 homolog A (S. cerevisiae)	NM_001177736 /// XR_026921	0.485479	0.475343	1.35359	1.35359	0.894565	1
Gga.8256.1.S1_at	424862	SLCO2A1	solute carrier organic anion transporter family, member 2A1	XM_422673	0.155679	0.0159669	1.35338	1.35338	1.8674	1
GgaAffx.20318.1.S1_at	---	---	---	---	0.0128709	0.00178503	1.3532	1.3532	4.17114	1
GgaAffx.6144.1.S1_s_at	421360	PTPN14	protein tyrosine phosphatase, non-receptor type 14	XM_001233468 /// XM_419419	0.0884181	0.0237545	1.35236	1.35236	2.35657	1
Gga.19185.1.S1_at	---	---	---	---	0.10062	0.175316	1.3523	1.3523	2.24355	1
Gga.3323.1.S1_s_at	420197	FABP5	fatty acid binding protein 5	NM_001006346	0.0621618	0.196765	1.35196	1.35196	2.66919	1
Gga.905.1.S1_at	374162	MKRN2	makorin, ring finger protein, 2	NM_204288	0.00724234	0.000712382	1.35157	1.35157	4.77104	1
Gga.12208.1.S1_a_at	425297	GINS1	GINS complex subunit 1 (Psf1 homolog)	NM_001012603	0.0555172	0.111922	1.35148	1.35148	2.77105	1
Gga.8969.1.S1_at	426746	OTUD3	OTU domain containing 3	XM_424363	0.165337	0.0524105	1.35147	1.35147	1.81605	1
Gga.4332.1.S1_at	396188	HSP90AB1	heat shock 90kDa protein 1, beta	NM_206959	0.00582937	0.023753	1.35146	1.35146	5.0056	1
Gga.1602.1.S1_at	420075	LINGO3	leucine rich repeat and Ig domain containing 3	XM_418194	0.0773439	0.22695	1.35118	1.35118	2.47448	1
Gga.17109.1.S1_at	---	---	---	---	0.0341304	0.0078267	1.35096	1.35096	3.21906	1
Gga.18193.1.S1_at	---	---	---	---	0.266128	0.290226	1.35093	1.35093	1.41222	1
GgaAffx.1777.1.S1_at	424368	UAP1	UDP-N-acteylglucosamine pyrophosphorylase 1	XR_027008	0.0172123	0.0491403	1.35073	1.35073	3.87921	1
Gga.14373.1.S1_at	771699	LOC771699	Similar to nebulin	XM_001234946	0.0352633	0.00625036	1.35049	1.35049	3.18847	1
Gga.11702.2.S1_s_at	422642	SDAD1	SDA1 domain containing 1	XM_420597	0.037713	0.0376312	1.35038	1.35038	3.1258	1
Gga.3141.2.S1_at	428633	CNR1	cannabinoid receptor 1 (brain)	NM_001038652 /// XM_001233603	0.0931469	0.0671605	1.3495	1.3495	2.31092	1
Gga.18018.1.S1_s_at	427171	PIK3R1	phosphoinositide-3-kinase, regulatory subunit 1 (p85 alpha)	XM_001232235 /// XM_424759	0.0174554	0.0475834	1.34944	1.34944	3.86531	1
GgaAffx.20473.1.S1_at	---	---	---	---	0.256997	0.042295	1.34925	1.34925	1.44181	1
GgaAffx.8255.1.S1_at	395891	CACNA1C	calcium channel, voltage-dependent, L type, alpha 1C subunit	XM_416388	0.128889	0.0481443	1.34925	1.34925	2.02924	1
Gga.3665.1.S2_at	373927	CDH20	Cadherin 20, type 2	NM_204134	0.229651	0.150922	1.34887	1.34887	1.5371	1
GgaAffx.4942.1.S1_at	---	---	---	---	0.209586	0.0265514	1.34868	1.34868	1.61457	1
Gga.14638.1.S1_at	---	---	---	---	0.0171935	0.00969673	1.34866	1.34866	3.8803	1
GgaAffx.11281.1.S1_at	425564	LOC425564	similar to death receptor 3	XM_423315	0.0582928	0.00656129	1.34818	1.34818	2.72699	1
Gga.4038.1.S1_at	---	---	---	---	0.00518223	0.00159148	1.34814	1.34814	5.13472	1
Gga.408.1.S1_at	395700	RPE65	retinal pigment epithelium-specific protein 65kDa	NM_204884	0.0392633	0.607737	1.34781	1.34781	3.08836	1
Gga.11053.1.S1_s_at	418142	IPO8	importin 8	XM_416373	0.0103167	0.00226675	1.3478	1.3478	4.39832	1
Gga.250.1.S1_at	395461	ESPN	espin	XM_417532	0.0948148	0.325452	1.34745	1.34745	2.2954	1
GgaAffx.21584.1.S1_at	---	---	---	---	0.575832	0.205701	1.3472	1.3472	0.739934	1
Gga.1210.1.S2_at	404779	CCRN4L	CCR4 carbon catabolite repression 4-like (S. cerevisiae)	NM_001009928	0.0407522	0.00287069	1.3469	1.3469	3.05387	1
Gga.19042.1.S1_s_at	422052	CDC5L	CDC5 cell division cycle 5-like (S. pombe)	XM_420058	0.0229895	0.0248707	1.34676	1.34676	3.59559	1
Gga.971.1.S1_at	395335	CISH	cytokine inducible SH2-containing protein	NM_204626	0.141691	0.0240682	1.34638	1.34638	1.94793	1
Gga.19612.1.S1_at	---	---	---	---	0.00427425	0.0104374	1.34635	1.34635	5.34911	1
Gga.6250.1.S1_at	425664	SELENBP1	selenium binding protein 1	XM_423397	0.000347113	0.0353549	1.34629	1.34629	8.52948	1
GgaAffx.3315.1.S1_at	424819	CLSTN2	calsyntenin 2	XM_422633	0.304644	0.0519333	1.3462	1.3462	1.29749	1
Gga.13182.1.S1_at	---	---	---	---	0.0695764	0.0823637	1.34609	1.34609	2.56843	1
Gga.13078.1.S1_at	---	---	---	---	0.386362	0.0808185	1.34563	1.34563	1.09419	1
Gga.18910.1.S1_s_at	396368	GNAI1	guanine nucleotide binding protein (G protein), alpha inhibiting activity polype	NM_205403	0.0743975	0.0676688	1.34557	1.34557	2.50888	1
Gga.15242.1.S1_at	---	---	---	---	0.00724898	0.0366353	1.34556	1.34556	4.77006	1
GgaAffx.21645.1.S1_at	415952	CENPP	Centromere protein P	NM_001044635	0.00172698	0.00119726	1.34541	1.34541	6.41077	1
Gga.11450.1.S1_at	418196	ETNK1	ethanolamine kinase 1	XM_416426	0.00315223	0.00169201	1.34521	1.34521	5.69587	1
GgaAffx.26532.1.S1_at	417667	MSI2	musashi homolog 2 (Drosophila)	XM_415912	0.000636809	0.000313886	1.34452	1.34452	7.68961	1
GgaAffx.1717.2.S1_s_at	429124	PCOLCE2	procollagen C-endopeptidase enhancer 2	XM_426680	0.0275121	0.0595542	1.34386	1.34386	3.42298	1
Gga.11967.1.S1_at	418795	GPC5	Glypican 5	XM_416990	0.0838658	0.0120454	1.34383	1.34383	2.40303	1
Gga.11993.1.S1_s_at	424631	RNF11	ring finger protein 11	NM_001006540	0.00606723	0.00687131	1.34366	1.34366	4.96203	1
Gga.14578.1.S1_at	---	---	---	---	0.0884669	0.0423757	1.34325	1.34325	2.35609	1
Gga.4384.1.S1_at	374012	BIRC2	baculoviral IAP repeat-containing 2	NM_001007822	0.0442101	0.0889533	1.34293	1.34293	2.97875	1
Gga.686.1.S1_at	396165	BMP4	bone morphogenetic protein 4	NM_205237	0.337856	0.0469169	1.34258	1.34258	1.20931	1
Gga.16780.1.S1_at	425121 /// 429228	KLHL5 /// LOC429228	kelch-like 5 (Drosophila) /// similar to KLHL5 protein	XM_422912 /// XM_426784	0.0213428	0.00517122	1.34258	1.34258	3.66777	1
Gga.280.1.S1_at	395518	MAFK	v-maf musculoaponeurotic fibrosarcoma oncogene homolog K	NM_204756	0.0161047	0.00104497	1.34251	1.34251	3.94538	1
GgaAffx.10212.1.S1_at	---	---	---	---	0.122798	0.0462774	1.34202	1.34202	2.07094	1
Gga.14302.1.S1_s_at	416800	ULK1	unc-51-like kinase 1 (C. elegans)	XM_415091	0.0741888	0.0132341	1.34106	1.34106	2.51137	1
GgaAffx.9457.1.S1_at	---	---	---	---	0.0185273	0.0191599	1.34104	1.34104	3.80641	1
GgaAffx.3524.1.S1_at	427639	ARSI	arylsulfatase family, member I	XM_425212	0.00806358	0.00305256	1.34099	1.34099	4.65664	1
Gga.7842.1.S1_at	771165	ARRDC2	Arrestin domain containing 2	XM_001233359	0.168456	0.0713408	1.3409	1.3409	1.80013	1
Gga.5483.1.S1_s_at	423669	CHUK	conserved helix-loop-helix ubiquitous kinase	NM_001012904	0.0579269	0.0120782	1.34057	1.34057	2.73267	1
Gga.14079.1.S1_at	423048	LOC423048	Similar to RAB6 interacting protein 1	XR_026988	0.000300023	2.90542e-05	1.34036	1.34036	8.73872	1
Gga.3321.1.S1_s_at	396138	GRIA3	glutamate receptor, ionotrophic, AMPA 3	NM_001112799 /// NM_205215	0.425018	0.384475	1.34033	1.34033	1.01154	1
Gga.15846.1.S1_at	---	---	---	---	0.117999	0.0423989	1.33999	1.33999	2.10534	1
GgaAffx.25180.2.A1_at	771527	LOC771527	hypothetical protein LOC771527	XM_001233767	0.0576907	0.0666205	1.33975	1.33975	2.73635	1
Gga.11128.1.A1_at	---	---	---	---	0.0302478	0.00573076	1.33872	1.33872	3.33287	1
GgaAffx.10072.2.A1_at	771973	HTR1E	5-hydroxytryptamine (serotonin) receptor 1E	XM_001235178	0.691432	0.339241	1.3386	1.3386	0.564151	1
Gga.11590.1.S1_a_at	---	---	---	---	0.0847632	0.0363709	1.33824	1.33824	2.39366	1
GgaAffx.12275.1.S1_s_at	424295	MCM6	minichromosome maintenance complex component 6	NM_001006527	0.0219042	0.0279906	1.33819	1.33819	3.64251	1
Gga.6326.1.S1_s_at	423693	LOC423693	similar to Gu protein	XM_421574	0.0674238	0.0591067	1.33813	1.33813	2.59646	1
Gga.13179.1.S1_at	---	---	---	---	0.036342	0.00724303	1.33801	1.33801	3.16031	1
GgaAffx.6009.1.S1_at	422425	SPOCK3	sparc/osteonectin, cwcv and kazal-like domains proteoglycan (testican) 3	XM_420393	0.0531369	0.299888	1.33792	1.33792	2.81075	1
Gga.17895.1.S1_at	---	---	---	---	0.158045	0.0488191	1.33749	1.33749	1.85452	1
GgaAffx.25800.3.S1_s_at	776927	LOC776927	similar to HBxAg transactivated protein 2	XM_001236418	0.19211	0.0449894	1.33725	1.33725	1.68842	1
AF243438.CDS62.S1_s_at	396264	LOC396264	MDV alpha TIF	NM_205324	0.0209504	0.00241959	1.33713	1.33713	3.68586	1
GgaAffx.11747.1.S1_at	422902	SLBP	stem-loop (histone) binding protein	NM_001004403	0.0843712	0.2006	1.33701	1.33701	2.39774	1
Gga.249.1.S1_at	395458	SLC6A2	solute carrier family 6 (neurotransmitter transporter, noradrenalin), member 2	NM_204716	0.00828989	0.144022	1.33697	1.33697	4.62734	1
Gga.17984.1.S1_at	420606	LOC420606	Similar to multidrug resistance protein 1a	XM_418707	0.120037	0.272966	1.33609	1.33609	2.09055	1
Gga.3851.1.S1_at	396047	SNAI1	snail homolog 1 (Drosophila)	NM_205142	0.0160865	0.152362	1.33587	1.33587	3.9465	1
GgaAffx.2975.1.S1_at	415594 /// 776238	DMXL2 /// LOC776238	Dmx-like 2 /// similar to rabconnectin	XM_001235770 /// XR_026957	0.0630515	0.00822006	1.33557	1.33557	2.65644	1
GgaAffx.25891.1.S1_at	416438	NPTX2	neuronal pentraxin II	XM_414750	0.00801558	0.0305193	1.33535	1.33535	4.66297	1
Gga.1335.1.S1_at	395809	SLC4A2	solute carrier family 4, anion exchanger, member 2 (erythrocyte membrane protein	NM_204963 /// XM_001231601	0.114374	0.0175093	1.33524	1.33524	2.13232	1
GgaAffx.12952.1.S1_at	428246	USP28	ubiquitin specific peptidase 28	NM_001031496	0.000870274	0.00145766	1.33517	1.33517	7.27606	1
Gga.2998.1.S1_at	420442	INSIG1	insulin induced gene 1	NM_001030966	0.249261	0.161419	1.33462	1.33462	1.4677	1
GgaAffx.23696.1.S1_s_at	423518	PRKCH	protein kinase C, eta	XM_421417	0.137666	0.0376883	1.33416	1.33416	1.97264	1
Gga.4719.1.S1_a_at	396536	APOA1	apolipoprotein A-I	NM_205525 /// XM_423364	0.0229765	0.00308739	1.33402	1.33402	3.59614	1
Gga.11348.2.S1_a_at	---	---	---	---	0.00753639	0.00207131	1.334	1.334	4.72852	1
GgaAffx.25677.1.S1_s_at	426928	ENPP3	ectonucleotide pyrophosphatase/phosphodiesterase 3	XR_027215	0.0757963	0.036859	1.33362	1.33362	2.49237	1
Gga.4138.1.S1_a_at	395905	EIF4G2	eukaryotic translation initiation factor 4 gamma, 2	NM_001043349 /// NM_001099860	0.00280863	0.000623048	1.33362	1.33362	5.82989	1
Gga.3215.1.S1_at	---	---	---	---	0.0617855	0.0361288	1.33358	1.33358	2.67464	1
Gga.8332.1.S1_at	---	---	---	---	0.00484407	0.0194532	1.3335	1.3335	5.2094	1
GgaAffx.21581.1.S1_s_at	395451	CXCL14	chemokine (C-X-C motif) ligand 14	NM_204712	0.0223566	0.537314	1.33331	1.33331	3.62265	1
GgaAffx.20794.1.S1_s_at	415456	LOC415456	hypothetical gene supported by CR388912	XM_429329	0.00200933	0.00541216	1.33324	1.33324	6.22705	1
GgaAffx.2780.1.S1_at	---	---	---	---	0.0039126	0.000488545	1.33314	1.33314	5.44879	1
Gga.794.1.S1_at	396389	NTN1	netrin 1	NM_205419	0.0934417	0.125777	1.33311	1.33311	2.30816	1
Gga.19402.1.S1_at	425986	LOXL3	Lysyl oxidase-like 3	XM_423667	0.278089	0.0667811	1.3329	1.3329	1.37494	1
Gga.5377.2.S1_a_at	415633	GPR56	G protein-coupled receptor 56	XM_413999	0.0303777	0.0955569	1.33268	1.33268	3.32882	1
Gga.15961.2.S1_at	421039 /// 768721	CEP76 /// LOC768721	centrosomal protein 76kDa /// similar to Centrosomal protein 76kDa	XM_001231808 /// XM_419124	0.269771	0.134627	1.33241	1.33241	1.40069	1
Gga.4522.2.S1_a_at	422813	DHX15	DEAH (Asp-Glu-Ala-His) box polypeptide 15	NM_001031159	0.186051	0.0508831	1.33155	1.33155	1.71563	1
Gga.1138.1.S1_s_at	415668	AARS	alanyl-tRNA synthetase	NM_001005836	0.0938312	0.00938444	1.33154	1.33154	2.30452	1
Gga.16413.1.A1_a_at	396515	FGFR3	fibroblast growth factor receptor 3	NM_205509	6.63279e-05	0.0031598	1.33122	1.33122	11.0887	1
GgaAffx.25795.1.S1_s_at	420120	COMP	cartilage oligomeric matrix protein	XM_418238	0.136374	0.105613	1.33121	1.33121	1.98073	1
Gga.19474.1.S1_at	422242	MAP7D3	MAP7 domain containing 3	XM_420230	0.188091	0.104403	1.33118	1.33118	1.70637	1
Gga.6113.1.S1_at	---	---	---	---	0.0459174	0.0376162	1.33061	1.33061	2.94395	1
Gga.9209.1.S1_at	503574	ASCC3L1	activating signal cointegrator 1 complex subunit 3-like 1	NM_001012701 /// XM_001236976	0.0595374	0.00398397	1.33059	1.33059	2.70796	1
GgaAffx.20539.1.S1_at	420104	SBNO2	Strawberry notch homolog 2 (Drosophila)	XM_418225	0.00925309	0.0126969	1.33021	1.33021	4.51169	1
GgaAffx.24281.1.S1_s_at	421672	HIVEP2	human immunodeficiency virus type I enhancer binding protein 2	XM_419711	0.10427	0.0653776	1.33014	1.33014	2.21254	1
GgaAffx.25879.1.S1_s_at	420130	MAST3	microtubule associated serine/threonine kinase 3	XM_418247	0.271134	0.0320286	1.33013	1.33013	1.39642	1
Gga.5890.1.S1_at	419865	WDR77	WD repeat domain 77	NM_001030916	0.0172067	0.0101738	1.32989	1.32989	3.87953	1
Gga.2615.1.S1_at	374077	GNA11	guanine nucleotide binding protein (G protein), alpha 11 (Gq class)	NM_204234	0.12331	0.0242975	1.32977	1.32977	2.06735	1
GgaAffx.7020.1.A1_at	428906	BDKRB2	bradykinin receptor B2	NM_001031553	0.00381186	0.00049264	1.32953	1.32953	5.47835	1
GgaAffx.9494.1.S1_s_at	431595	LOC431595	similar to KIAA0888 protein	XM_429149	0.00878275	0.00805094	1.32944	1.32944	4.56643	1
Gga.13346.1.S1_a_at	422150	LOC422150	similar to Burkitt lymphoma receptor 1 isoform 2; Burkitt lymphoma receptor 1, G	XM_420151	0.00823191	0.0129756	1.32857	1.32857	4.63476	1
Gga.12380.1.S1_s_at	427502	TRPM7	transient receptor potential cation channel, subfamily M, member 7	NM_001177555 /// XM_425074	0.0223037	0.0402574	1.32847	1.32847	3.62495	1
Gga.19547.1.S1_at	---	---	---	---	0.381077	0.198902	1.32831	1.32831	1.10606	1
Gga.19164.1.S1_at	417787	PDZRN4	PDZ domain containing RING finger 4	XM_416030	0.0147967	0.000893968	1.32787	1.32787	4.03019	1
Gga.16554.2.S1_a_at	770893	LAPTM4B	lysosomal associated protein transmembrane 4 beta	XM_001233338	0.0691953	0.148691	1.32768	1.32768	2.57333	1
Gga.13901.1.S1_at	396276	COL14A1	Collagen, type XIV, alpha 1 (undulin)	NM_205334	0.482332	0.164846	1.32759	1.32759	0.900343	1
Gga.1014.1.S1_at	---	---	---	---	0.244458	0.134668	1.32744	1.32744	1.48418	1
GgaAffx.505.1.S1_at	423960 /// 426270	DOCK1 /// LOC426270	dedicator of cytokinesis 1 /// similar to DOCK180 protein	XM_421819 /// XM_423933	0.0239462	0.00958618	1.3272	1.3272	3.55618	1
Gga.12263.1.S1_at	426090	ATP13A1	ATPase type 13A1	XM_423767	0.0533201	0.00460978	1.32713	1.32713	2.80762	1
Gga.18269.1.S1_at	---	---	---	---	0.0762356	0.0119441	1.32699	1.32699	2.48725	1
Gga.12507.1.S1_s_at	418947	ZDHHC20	zinc finger, DHHC-type containing 20	XM_417141	0.233781	0.0299883	1.32691	1.32691	1.522	1
GgaAffx.5880.1.S1_at	---	---	---	---	0.000436554	0.0238631	1.3269	1.3269	8.20637	1
Gga.4196.1.S1_at	422866	ABLIM2	actin binding LIM protein family, member 2	XM_420811	0.120592	0.235977	1.32687	1.32687	2.08657	1
GgaAffx.23573.1.S1_at	422635	2011-09-11	septin 11	XM_420591	0.00171961	0.00527736	1.32656	1.32656	6.416	1
Gga.17604.1.S1_s_at	418065	PRDM4	PR domain containing 4	XM_416301	0.0348162	0.00415501	1.32613	1.32613	3.20042	1
Gga.12948.1.S1_at	770339	TPD52	tumor protein D52	NM_001079754 /// XM_001233679	0.0560111	0.186992	1.32612	1.32612	2.76304	1
Gga.3116.1.S1_at	417746	TRABD	TraB domain containing	NM_001030732	0.121779	0.0145866	1.32605	1.32605	2.07812	1
GgaAffx.24992.1.S1_s_at	421992	DTNB	dystrobrevin, beta	NM_001031095	0.00485765	0.0268693	1.3258	1.3258	5.20629	1
Gga.11325.1.S1_at	404300	GCM1	glial cells missing homolog 1 (Drosophila)	NM_206980	0.0328793	0.00357974	1.32573	1.32573	3.25414	1
GgaAffx.9871.1.S1_at	771074	TTPA	tocopherol (alpha) transfer protein	XM_001234375	0.0346497	0.00343999	1.32547	1.32547	3.2049	1
GgaAffx.20956.1.S1_at	424632	C1orf34	Chromosome 1 open reading frame 34	XM_422466	0.210854	0.0750482	1.32545	1.32545	1.60945	1
GgaAffx.10890.1.S1_at	418875	SERPINE3	serpin peptidase inhibitor, clade E (nexin, plasminogen activator inhibitor type	XM_417070	0.0322928	0.0106843	1.32537	1.32537	3.27108	1
GgaAffx.21680.1.S1_at	---	---	---	---	0.0533506	0.0162202	1.32527	1.32527	2.80711	1
Gga.11207.1.S1_s_at	422345	ACSL4	acyl-CoA synthetase long-chain family member 4	XM_420317	0.0868284	0.112712	1.32489	1.32489	2.3725	1
GgaAffx.22371.1.S1_at	419341	TSHZ2	teashirt family zinc finger 2	XM_417506	0.070693	0.0432751	1.32485	1.32485	2.55426	1
GgaAffx.21349.1.S1_at	418681	NIPA1	Non imprinted in Prader-Willi/Angelman syndrome 1	NM_001030810	0.14504	0.0174934	1.32475	1.32475	1.92792	1
Gga.17800.1.S1_at	421067	ESCO1	establishment of cohesion 1 homolog 1 (S. cerevisiae)	XM_419155	0.367324	0.115947	1.32432	1.32432	1.13768	1
Gga.13385.1.S1_at	430303	LOC430303	Hypothetical LOC430303	XM_427861	0.3415	0.248652	1.3243	1.3243	1.20014	1
Gga.1983.1.S1_at	---	---	---	---	0.000324661	0.00321572	1.32427	1.32427	8.62508	1
Gga.19154.1.S1_at	---	---	---	---	0.000193334	0.026636	1.32423	1.32423	9.38761	1
Gga.13535.1.S1_at	776634	LOC776634	Similar to DNA-dependent protein kinase catalytic subunit	XM_001236145	0.0934936	0.045106	1.32403	1.32403	2.30767	1
Gga.897.1.S1_at	374156	DKK1	dickkopf homolog 1 (Xenopus laevis)	XM_421563	0.0165964	0.0146176	1.32394	1.32394	3.91541	1
GgaAffx.20160.2.A1_at	---	---	---	---	0.128489	0.046316	1.32345	1.32345	2.03191	1
GgaAffx.24337.1.S1_at	426357	C1orf77	chromosome 1 open reading frame 77	XM_424013	0.0637743	0.0256485	1.32326	1.32326	2.64622	1
Gga.9315.1.S1_at	420046	KRT222P	Keratin 222 pseudogene	XM_418169	0.361412	0.121031	1.32325	1.32325	1.15161	1
Gga.11764.3.A1_a_at	423003	GCHFR	GTP cyclohydrolase I feedback regulator	XM_420935	0.145131	0.350844	1.32306	1.32306	1.92738	1
GgaAffx.879.2.S1_s_at	427752	PTGS1	prostaglandin-endoperoxide synthase 1 (prostaglandin G/H synthase and cyclooxyge	XM_425326	0.248492	0.150488	1.32299	1.32299	1.47032	1
Gga.4017.1.S1_at	395701	EZR	ezrin	NM_204885	0.0606005	0.0197975	1.32269	1.32269	2.69204	1
Gga.7121.1.S1_at	---	---	---	---	0.298607	0.0469669	1.32264	1.32264	1.3145	1
Gga.14798.1.A1_at	---	---	---	---	0.0286696	0.00810973	1.32263	1.32263	3.38373	1
GgaAffx.20980.1.S1_at	396138	GRIA3	Glutamate receptor, ionotrophic, AMPA 3	NM_001112799 /// NM_205215	0.294937	0.265419	1.32247	1.32247	1.32501	1
Gga.6915.1.A1_at	---	---	---	---	0.579867	0.35868	1.32229	1.32229	0.733455	1
GgaAffx.24870.1.S1_s_at	419520	SLC23A2	solute carrier family 23 (nucleobase transporters), member 2	NM_001145227 /// XM_417671	0.00304919	0.00629981	1.32126	1.32126	5.73432	1
GgaAffx.1376.1.S1_at	417523	MMP28	matrix metallopeptidase 28	XM_415771	0.0225454	0.0306091	1.32082	1.32082	3.61449	1
Gga.5698.1.S1_at	420890	GMDS	GDP-mannose 4,6-dehydratase	XM_418977	0.0463104	0.00782403	1.32046	1.32046	2.93614	1
Gga.6311.1.S1_at	428365	HEY1	hairy/enhancer-of-split related with YRPW motif 1	XM_425926	0.10228	0.0271546	1.32043	1.32043	2.2293	1
Gga.13442.1.S2_s_at	395511	RDX	radixin	NM_204751	0.321675	0.118702	1.32028	1.32028	1.25119	1
Gga.1737.1.S1_at	417220	SLC27A4	Solute carrier family 27 (fatty acid transporter), member 4	XM_415504	0.0245745	0.0035759	1.32025	1.32025	3.53121	1
Gga.13652.1.A1_at	---	---	---	---	0.0363033	0.00739521	1.32014	1.32014	3.16131	1
GgaAffx.7202.1.S1_at	417735	CRELD2	cysteine-rich with EGF-like domains 2	XM_415980	0.0415176	0.139465	1.31963	1.31963	3.03667	1
Gga.681.1.S1_at	396157	NTRK2	neurotrophic tyrosine kinase, receptor, type 2	NM_205231	0.20825	0.0440948	1.31953	1.31953	1.61999	1
Gga.2911.1.S1_at	---	---	---	---	0.0256381	0.0599542	1.31944	1.31944	3.49048	1
Gga.5802.1.S1_at	---	---	---	---	0.0470008	0.0221241	1.31942	1.31942	2.92258	1
Gga.12999.1.S1_at	428658	TMEM214	transmembrane protein 214	XM_426216	0.251311	0.030439	1.31941	1.31941	1.46076	1
Gga.4769.1.S1_s_at	424804	CUL3	cullin 3	XM_422620	0.0309891	0.0837314	1.31929	1.31929	3.30997	1
Gga.9254.1.S1_at	---	---	---	---	0.609883	0.144008	1.3192	1.3192	0.686181	1
Gga.11321.1.S1_at	396506	S100A10	S100 calcium binding protein A10	NM_205506	0.00137706	0.000413823	1.31855	1.31855	6.69044	1
GgaAffx.21504.1.S1_s_at	415694	BBS2	Bardet-Biedl syndrome 2	NM_001012777	0.155923	0.0201741	1.31853	1.31853	1.86606	1
Gga.4046.1.S1_at	395588	MEIS2	Meis homeobox 2	NM_204803	0.0869489	0.0327163	1.31833	1.31833	2.37128	1
GgaAffx.4305.1.S1_at	416610	TMC7	transmembrane channel-like 7	NM_001030641	0.11377	0.015061	1.31828	1.31828	2.1369	1
GgaAffx.20135.1.S1_s_at	420027	STAT3	signal transducer and activator of transcription 3 (acute-phase response factor)	NM_001030931 /// XM_001231210	0.101908	0.113238	1.31826	1.31826	2.23247	1
Gga.9290.1.S1_at	395140	HS2ST1	heparan sulfate 2-O-sulfotransferase 1	NM_204481	0.0406433	0.0317021	1.31763	1.31763	3.05635	1
GgaAffx.20867.1.S1_s_at	---	---	---	---	0.19079	0.117272	1.31756	1.31756	1.69427	1
Gga.3074.1.S1_a_at	404269	C-16	galectin CG-16	NM_206905	0.0751958	0.119493	1.31746	1.31746	2.49942	1
Gga.2612.2.S1_a_at	395861	KRT19	keratin 19	NM_205009	0.0295644	0.0395563	1.31721	1.31721	3.35453	1
Gga.18470.1.S1_at	768251	LOC768251	hepatic amylase pseudogene	NR_003250 /// XR_027246	0.348931	0.105724	1.31721	1.31721	1.18173	1
Gga.1943.1.S1_a_at	427336	KIAA0368	KIAA0368	XM_424915	0.123231	0.0504185	1.31708	1.31708	2.0679	1
GgaAffx.102.1.S1_at	415600	ADAMTS19	ADAM metallopeptidase with thrombospondin type 1 motif, 19	XM_413968	0.502415	0.178777	1.31704	1.31704	0.863983	1
Gga.12124.1.S1_at	427491	LOC427491	similar to hypothetical LOC145741	XM_425063	0.0188681	0.00339598	1.31624	1.31624	3.78845	1
GgaAffx.21678.1.S1_at	---	---	---	---	0.0160782	0.0513931	1.31593	1.31593	3.94702	1
GgaAffx.2589.1.S1_s_at	415401	SLTM	SAFB-like, transcription modulator	XM_413786	0.0136926	0.00129763	1.31568	1.31568	4.10837	1
Gga.14417.1.S1_a_at	419837	SLC41A1	Solute carrier family 41, member 1	XM_417968	0.00230952	0.000552146	1.31534	1.31534	6.06041	1
Gga.3141.1.S1_at	428633	CNR1	cannabinoid receptor 1 (brain)	NM_001038652 /// XM_001233603	0.0760128	0.197063	1.31518	1.31518	2.48985	1
GgaAffx.8992.1.S1_at	418232	SULT4A1	sulfotransferase family 4A, member 1	XM_416456	0.0329754	0.0243727	1.31515	1.31515	3.2514	1
GgaAffx.20492.1.S1_at	---	---	---	---	0.0195438	0.00492202	1.31502	1.31502	3.75387	1
GgaAffx.6405.2.S1_s_at	422496	HSPA4L	heat shock 70kDa protein 4-like	NM_001012576	0.0157168	0.04259	1.31482	1.31482	3.96972	1
GgaAffx.5725.1.S1_at	424975	ACTL6A	actin-like 6A	XM_422784	0.0722876	0.0863731	1.31426	1.31426	2.53442	1
GgaAffx.1501.1.S1_s_at	419628	EIF2C3	eukaryotic translation initiation factor 2C, 3	NM_001030900	0.155572	0.0382886	1.31424	1.31424	1.86798	1
GgaAffx.911.1.S1_at	417491	MYBBP1A	MYB binding protein (P160) 1a	XM_415739	0.0959858	0.0756826	1.3142	1.3142	2.28468	1
GgaAffx.10866.1.S1_s_at	418841	NUFIP1	nuclear fragile X mental retardation protein interacting protein 1	NM_001030825	0.0550803	0.0584667	1.3138	1.3138	2.7782	1
GgaAffx.1333.1.S1_at	431417	PDILT	protein disulfide isomerase-like, testis expressed	XM_428969	0.81679	0.326127	1.31367	1.31367	0.384957	1
GgaAffx.10181.2.S1_s_at	421871	FAM135A	family with sequence similarity 135, member A	XM_419888	0.0443629	0.00846545	1.31352	1.31352	2.97557	1
GgaAffx.9882.1.S1_at	395291	ROBO2	roundabout, axon guidance receptor, homolog 2 (Drosophila)	XM_416674	0.174846	0.055223	1.31325	1.31325	1.76844	1
GgaAffx.9592.1.S1_x_at	---	---	---	---	0.163088	0.0275515	1.31322	1.31322	1.82773	1
Gga.11423.1.S1_at	---	---	---	---	0.0865252	0.0608096	1.31293	1.31293	2.37558	1
GgaAffx.10436.4.S1_s_at	420328	ADCY8	adenylate cyclase 8 (brain)	XM_418437	0.307239	0.267126	1.31276	1.31276	1.29028	1
Gga.10977.1.S1_at	771271	KCNE4	Potassium voltage-gated channel, Isk-related family, member 4	XM_001234562	0.359405	0.108421	1.31271	1.31271	1.15639	1
Gga.17514.1.S1_at	415906	PFKFB4	6-phosphofructo-2-kinase/fructose-2,6-biphosphatase 4	NM_001030584 /// XM_001232887	0.000633159	0.000724622	1.31268	1.31268	7.69733	1
Gga.3907.1.S1_at	395603	LOC395603	fibroblast growth factor receptor FREK	---	0.000436798	0.00307511	1.3124	1.3124	8.20559	1
Gga.10419.1.S1_at	---	---	---	---	0.0356828	0.00420105	1.31215	1.31215	3.17741	1
Gga.260.1.S1_a_at	425097	CCDC86	coiled-coil domain containing 86	XR_026987	0.0679632	0.0205588	1.3119	1.3119	2.58935	1
GgaAffx.7354.1.A1_at	---	---	---	---	0.0330801	0.00650687	1.31129	1.31129	3.24841	1
GgaAffx.21427.1.S1_at	416640	CARHSP1	Calcium regulated heat stable protein 1, 24kDa	XM_414938	0.0165772	0.00905916	1.31076	1.31076	3.91656	1
Gga.10167.1.S1_at	417883	NTS	neurotensin	XM_416126	0.683244	0.534802	1.31075	1.31075	0.576078	1
Gga.16835.1.S1_at	416304	SPOCK1	sparc/osteonectin, cwcv and kazal-like domains proteoglycan (testican) 1	XM_414622	0.244016	0.0949782	1.31045	1.31045	1.48571	1
GgaAffx.10214.1.S1_at	420244	RGS22	regulator of G-protein signalling 22	XM_418356	0.244993	0.18292	1.31025	1.31025	1.48233	1
GgaAffx.11861.1.S1_at	423631	RASGEF1A	RasGEF domain family, member 1A	NM_001031219	0.163413	0.146295	1.30975	1.30975	1.82603	1
GgaAffx.20338.1.S1_at	---	---	---	---	0.00797646	0.0259982	1.30963	1.30963	4.66816	1
Gga.17786.1.S1_at	---	---	---	---	0.00603818	0.000429656	1.30905	1.30905	4.96725	1
Gga.14307.1.S1_at	---	---	---	---	0.293155	0.0662465	1.30896	1.30896	1.33016	1
Gga.6877.1.S1_at	395291	ROBO2	roundabout, axon guidance receptor, homolog 2 (Drosophila)	XM_416674	0.109168	0.0647499	1.30871	1.30871	2.17268	1
GgaAffx.21060.1.S1_s_at	---	---	---	---	0.0485572	0.0417393	1.30867	1.30867	2.89279	1
GgaAffx.290.1.S1_at	428203	ADRA1A	adrenergic, alpha-1A-, receptor	XM_425762	0.135358	0.0144779	1.30851	1.30851	1.98715	1
Gga.13301.1.S1_at	419070	GDPD5	glycerophosphodiester phosphodiesterase domain containing 5	NM_001037271	0.0497659	0.141193	1.30849	1.30849	2.87036	1
GgaAffx.26688.2.S1_s_at	415455	PDE8A	phosphodiesterase 8A	XM_413834	0.250665	0.0810405	1.30848	1.30848	1.46294	1
GgaAffx.7629.1.S1_s_at	418005	MKL1	megakaryoblastic leukemia (translocation) 1	XM_416243	0.31387	0.0655066	1.30846	1.30846	1.27211	1
GgaAffx.25061.1.S1_at	395514	EIF5B	eukaryotic translation initiation factor 5B	NM_001038496	0.00421246	0.00049254	1.30802	1.30802	5.36548	1
Gga.1132.1.S1_at	374189	ME1	malic enzyme 1, NADP(+)-dependent, cytosolic	NM_204303	0.0135835	0.0148002	1.3079	1.3079	4.11647	1
GgaAffx.9658.1.S1_at	---	---	---	---	0.180692	0.0289874	1.30784	1.30784	1.74047	1
Gga.17920.1.S1_at	---	---	---	---	0.205614	0.0289461	1.30752	1.30752	1.63079	1
Gga.1552.1.A1_at	---	---	---	---	0.0323652	0.00297311	1.30745	1.30745	3.26897	1
Gga.10433.1.S1_s_at	416312	DDX46	DEAD (Asp-Glu-Ala-Asp) box polypeptide 46	XM_414629	0.20733	0.0307225	1.30735	1.30735	1.62374	1
Gga.16034.1.S1_s_at	424906	CCDC50	coiled-coil domain containing 50	NM_001031315	0.117494	0.0756259	1.30729	1.30729	2.10905	1
GgaAffx.8401.1.S1_at	420977	ANKS6	ankyrin repeat and sterile alpha motif domain containing 6	XM_419064	0.00714445	0.000361202	1.30717	1.30717	4.78561	1
Gga.12642.1.S1_at	424434	LOC424434	hypothetical LOC424434	XM_422276	0.130693	0.220075	1.30709	1.30709	2.01728	1
GgaAffx.12805.1.S1_at	---	---	---	---	0.0742813	0.0637895	1.30706	1.30706	2.51027	1
GgaAffx.26129.1.S1_at	417439	FAM20A	family with sequence similarity 20, member A	XM_415690	0.579792	0.107081	1.30656	1.30656	0.733577	1
Gga.536.1.S1_a_at	395908	OASL	2'-5'-oligoadenylate synthetase-like	NM_205041	0.219782	0.388372	1.30646	1.30646	1.57431	1
Gga.2564.1.S1_s_at	418621	AP1S2	adaptor-related protein complex 1, sigma 2 subunit	NM_001006261	0.000503881	0.00301676	1.30633	1.30633	8.00784	1
GgaAffx.25828.1.S1_at	424399	LOC424399	hypothetical LOC424399	XM_422243	0.0613406	0.0442253	1.30623	1.30623	2.68113	1
Gga.4516.2.S1_s_at	422635	2011-09-11	septin 11	XM_420591	0.0104916	0.0860432	1.30615	1.30615	4.38089	1
GgaAffx.21461.1.S1_at	---	---	---	---	0.044274	0.0193747	1.30607	1.30607	2.97742	1
Gga.2089.1.S1_at	418292	EMG1	EMG1 nucleolar protein homolog (S. cerevisiae)	XM_416515	0.0260861	0.108571	1.30593	1.30593	3.47387	1
Gga.19024.1.S1_s_at	426048	NCLN	nicalin homolog (zebrafish)	NM_001031354	0.0830065	0.0195631	1.30581	1.30581	2.4121	1
Gga.5592.1.S1_at	422004	ESCO2	establishment of cohesion 1 homolog 2 (S. cerevisiae)	XM_420012	0.145064	0.0938253	1.30565	1.30565	1.92778	1
Gga.3275.2.S1_at	---	---	---	---	0.0184398	0.0221202	1.30522	1.30522	3.81108	1
Gga.4017.1.S2_at	395701	EZR	ezrin	NM_204885	0.145977	0.0451998	1.30513	1.30513	1.92241	1
GgaAffx.12463.1.S1_s_at	424472	SLC35A3	solute carrier family 35 (UDP-N-acetylglucosamine (UDP-GlcNAc) transporter), mem	NM_001031274	0.0872316	0.00752228	1.3051	1.3051	2.36843	1
GgaAffx.5706.1.S1_s_at	770766	CCDC141	coiled-coil domain containing 141	XM_001234092	0.0842228	0.135998	1.30501	1.30501	2.39929	1
GgaAffx.21722.1.S1_at	---	---	---	---	0.574287	0.232208	1.30442	1.30442	0.742423	1
Gga.11235.1.S1_at	---	---	---	---	0.380109	0.258997	1.3043	1.3043	1.10825	1
GgaAffx.22727.1.S1_s_at	---	---	---	---	0.0862932	0.0271947	1.30418	1.30418	2.37793	1
Gga.18086.1.S1_at	---	---	---	---	0.0794179	0.0503551	1.30415	1.30415	2.45109	1
Gga.12936.1.S1_at	---	---	---	---	0.086794	0.309607	1.3041	1.3041	2.37285	1
Gga.1794.1.S1_at	770798	NCAM1	Neural cell adhesion molecule 1	XM_001234121	0.0158591	0.0149673	1.30384	1.30384	3.96072	1
Gga.7563.2.S1_s_at	769032	ZNF398	Zinc finger protein 398	XM_001232214	0.0360161	0.0155824	1.30365	1.30365	3.16872	1
Gga.7725.1.S1_at	426422	LOC426422	similar to PINCH protein	XM_424069	0.252536	0.147137	1.30356	1.30356	1.45664	1
Gga.2992.2.S1_at	420956	C18orf37	chromosome 18 open reading frame 37	XM_419041	0.00327286	0.0142339	1.30311	1.30311	5.65258	1
GgaAffx.22982.1.S1_at	421352	TGFB2	transforming growth factor, beta 2	NM_001031045	0.197303	0.0244579	1.3031	1.3031	1.66578	1
GgaAffx.11733.1.S1_s_at	420938	NSUN2	NOL1/NOP2/Sun domain family, member 2	NM_001031004	0.0109746	0.00728083	1.30272	1.30272	4.33438	1
GgaAffx.6163.1.S1_at	422447	CLGN	calmegin	XM_420413	0.122364	0.10986	1.30268	1.30268	2.07399	1
Gga.3917.2.S1_a_at	396262	RPLP1	Ribosomal protein, large, P1	NM_205322	0.0949521	0.00901833	1.30262	1.30262	2.29414	1
Gga.7235.1.S1_at	419480	DHRS3	dehydrogenase/reductase (SDR family) member 3	XM_417636	0.0514833	0.109274	1.30242	1.30242	2.83947	1
Gga.15685.1.S1_s_at	428769	NDST3	N-deacetylase/N-sulfotransferase (heparan glucosaminyl) 3	XM_426325	0.0436414	0.0290954	1.30239	1.30239	2.99066	1
Gga.16213.1.S1_at	---	GJC2	PREDICTED: Gallus gallus gap junction protein gamma 2 (GJC2), transcript variant X3, mRNA	XM_025147148.1	0.0692546	0.259887	1.30231	1.30231	2.57256	1
Gga.9145.1.S1_at	---	---	---	---	0.05332	0.00529934	1.30197	1.30197	2.80763	1
Gga.4512.3.S1_at	416275	RPS14	ribosomal protein S14	NM_001030619	0.346015	0.107196	1.30179	1.30179	1.18891	1
Gga.9824.1.S1_at	769860	LOC769860	Similar to cAMP-specific phosphodiesterase PDE4D6	XR_026702	0.550138	0.257371	1.30167	1.30167	0.781941	1
Gga.12361.1.S1_at	415492	RLBP1	retinaldehyde binding protein 1	NM_001024694	0.0453752	0.607653	1.30159	1.30159	2.95485	1
Gga.4579.1.S1_x_at	396254	TUBB2A	tubulin, beta 2A	NM_205315 /// XM_001236060	0.0648389	0.00603624	1.30112	1.30112	2.6314	1
Gga.12836.1.S1_at	419924	TOMM6	Translocase of outer mitochondrial membrane 6 homolog (yeast)	XM_429722	0.0036406	0.000308785	1.30088	1.30088	5.53063	1
Gga.9372.1.S1_at	---	---	---	---	0.010647	0.0270669	1.30066	1.30066	4.36568	1
Gga.18468.1.S1_at	---	---	---	---	0.0063399	0.00236515	1.30045	1.30045	4.91432	1
Gga.15868.1.S1_s_at	770956	TMEM37	transmembrane protein 37	XM_001234271	0.170705	0.043393	1.30044	1.30044	1.78884	1
GgaAffx.24627.1.S1_s_at	374052	F5	coagulation factor V (proaccelerin, labile factor)	XM_001231900	0.185236	0.219552	1.30039	1.30039	1.71936	1
Gga.7982.1.S1_at	---	---	---	---	0.150862	0.0523601	1.30027	1.30027	1.89425	1
GgaAffx.4342.1.S1_at	768638	FAM19A5	family with sequence similarity 19 (chemokine (C-C motif)-like), member A5	XM_001231693	0.353801	0.048209	1.30025	1.30025	1.16986	1
Gga.5453.1.S1_at	---	---	---	---	0.0658731	0.0095939	1.30019	1.30019	2.61724	1
Gga.19554.1.S1_at	---	---	---	---	0.696873	0.225191	1.30014	1.30014	0.556256	1
GgaAffx.10422.1.S1_at	421885	COL21A1	collagen, type XXI, alpha 1	XM_419902	0.217292	0.331418	1.30013	1.30013	1.58396	1
GgaAffx.24816.1.S1_at	421869	OGFRL1	opioid growth factor receptor-like 1	XM_419886	0.022637	0.0177982	1.30011	1.30011	3.61056	1
Gga.13308.1.S1_at	425255	SPR	Sepiapterin reductase (7,8-dihydrobiopterin:NADP+ oxidoreductase)	XM_423038	0.0141816	0.00258628	1.30002	1.30002	4.07293	1
GgaAffx.22381.3.S1_s_at	428253	ANKK1	ankyrin repeat and kinase domain containing 1	NM_001128828 /// XM_425812	0.125459	0.148204	1.29998	1.29998	2.05246	1
GgaAffx.26118.1.S1_at	423693	LOC423693	similar to Gu protein	XM_421574	0.08897	0.0750296	1.29969	1.29969	2.35111	1
Gga.12192.2.S1_a_at	427446	OSMR	oncostatin M receptor	XM_425020	0.130078	0.0761876	1.29965	1.29965	2.02134	1
GgaAffx.412.1.S1_s_at	395461	ESPN	espin	XM_417532	0.0741442	0.414579	1.2992	1.2992	2.51191	1
GgaAffx.9460.1.S1_at	770364	GOPC	golgi associated PDZ and coiled-coil motif containing	XM_001233700	0.274029	0.0553137	1.29911	1.29911	1.38742	1
Gga.554.1.S1_at	395941	HGF	hepatocyte growth factor (hepapoietin A; scatter factor)	NM_001030370 /// XM_001231309	0.265161	0.0646903	1.29909	1.29909	1.4153	1
GgaAffx.26682.1.S1_s_at	423061	TUB	tubby homolog (mouse)	XM_420992	0.228834	0.0244102	1.29895	1.29895	1.54012	1
GgaAffx.25990.1.S1_s_at	423682	PRKG1	protein kinase, cGMP-dependent, type I	XR_027075	0.0167553	0.00950704	1.29893	1.29893	3.90593	1
GgaAffx.24807.1.S1_at	420217	OSGIN2	oxidative stress induced growth inhibitor family member 2	XM_418327	0.0922253	0.012135	1.29887	1.29887	2.31962	1
GgaAffx.13108.1.S1_at	417564	DPH1	DPH1 homolog (S. cerevisiae)	NM_001030716	0.589758	0.17835	1.29874	1.29874	0.717704	1
GgaAffx.2089.1.S1_at	416228	NOP16	NOP16 nucleolar protein homolog (yeast)	XM_414551	0.261684	0.149258	1.29868	1.29868	1.42649	1
GgaAffx.20404.1.S1_at	---	---	---	---	0.183358	0.0267695	1.29849	1.29849	1.72802	1
GgaAffx.21470.1.S1_s_at	---	---	---	---	0.129713	0.0864489	1.2984	1.2984	2.02376	1
Gga.1449.1.S1_a_at	---	---	---	---	0.0374461	0.119142	1.29838	1.29838	3.13241	1
Gga.5128.1.S1_at	395082	CCL20	chemokine (C-C motif) ligand 20	NM_204438	0.680386	0.226621	1.29837	1.29837	0.580253	1
GgaAffx.7257.2.S1_at	420661	RBMS3	RNA binding motif, single stranded interacting protein	XM_418760	0.0898942	0.0405656	1.2982	1.2982	2.34205	1
Gga.9922.1.S1_at	420961	C9orf4	Chromosome 9 open reading frame 4	XM_419045	0.0393778	0.121009	1.29806	1.29806	3.08566	1
GgaAffx.25005.1.S1_at	422004	ESCO2	establishment of cohesion 1 homolog 2 (S. cerevisiae)	XM_420012	0.00696573	0.00322857	1.29802	1.29802	4.81279	1
Gga.13362.1.S1_at	---	---	---	---	0.107356	0.0935001	1.29781	1.29781	2.1872	1
GgaAffx.12430.1.S1_s_at	418140	FAM60A	family with sequence similarity 60, member A	NM_001030766	0.0130127	0.0190114	1.29762	1.29762	4.16001	1
GgaAffx.336.1.S1_at	419547 /// 419549	CCDC21 /// ZNF593	coiled-coil domain containing 21 /// zinc finger protein 593	NM_001006307 /// XM_417697	0.301788	0.0760983	1.29762	1.29762	1.3055	1
GgaAffx.5885.1.A1_at	424149	ZAK	sterile alpha motif and leucine zipper containing kinase AZK	XM_421996	0.297888	0.0433002	1.29756	1.29756	1.31656	1
GgaAffx.10012.1.S1_at	418473	CXADR	coxsackie virus and adenovirus receptor	XM_416681	0.344515	0.0813861	1.29754	1.29754	1.19263	1
Gga.13514.1.S1_at	---	---	---	---	0.00512917	0.130744	1.29751	1.29751	5.14608	1
Gga.5235.1.S1_at	428251	HYOU1	hypoxia up-regulated 1	NM_001006588	0.0121168	0.04039	1.29735	1.29735	4.23272	1
GgaAffx.2014.1.S1_at	417565	TSR1	TSR1, 20S rRNA accumulation, homolog (S. cerevisiae)	XM_001234319	0.0251295	0.0038057	1.29707	1.29707	3.50973	1
GgaAffx.26498.1.S1_s_at	428948	PDLIM1	PDZ and LIM domain 1 (elfin)	XM_001232673 /// XM_001232711 /// XM_001232727 /// XM_426503	0.117948	0.112672	1.29674	1.29674	2.10572	1
GgaAffx.10004.1.S1_at	771514	C4orf15	chromosome 4 open reading frame 15	XM_001234788	0.831217	0.30865	1.29639	1.29639	0.364124	1
Gga.7330.1.S1_at	418676	SLC9A7	solute carrier family 9 (sodium/hydrogen exchanger), member 7	XM_416872	0.102073	0.0252944	1.29637	1.29637	2.23106	1
Gga.1035.1.S1_at	396432	TGM2	transglutaminase 2 (C polypeptide, protein-glutamine-gamma-glutamyltransferase)	NM_205448	0.299791	0.0599511	1.29623	1.29623	1.31114	1
Gga.12322.1.S1_at	396085	NF1	neurofibromin 1	XM_415914	0.511777	0.145286	1.29588	1.29588	0.84743	1
Gga.12852.1.S1_at	420835	NOL7	Nucleolar protein 7, 27kDa	XM_418926	0.117208	0.103496	1.29585	1.29585	2.11116	1
Gga.281.1.S1_at	395519	MAFF	v-maf musculoaponeurotic fibrosarcoma oncogene homolog F (avian)	NM_204757	0.0211319	0.00382331	1.2958	1.2958	3.67745	1
Gga.207.1.S1_at	---	---	---	---	0.719903	0.590123	1.29558	1.29558	0.523071	1
GgaAffx.10050.1.S1_at	770067	CYYR1	cysteine/tyrosine-rich 1	XM_001233378	0.140132	0.019385	1.29556	1.29556	1.95741	1
Gga.857.1.S1_at	396494	EGFR	epidermal growth factor receptor (erythroblastic leukemia viral (v-erb-b) oncoge	NM_205497	0.123304	0.153982	1.29552	1.29552	2.06739	1
Gga.7243.1.S1_at	769005	AFMID	arylformamidase	XM_001231538 /// XM_001231575	0.448876	0.119292	1.2953	1.2953	0.963789	1
Gga.11759.1.S1_at	421879	RAB23	RAB23, member RAS oncogene family	NM_001110060 /// XM_419896	0.23012	0.0836913	1.29491	1.29491	1.53537	1
GgaAffx.20098.1.S1_at	771805	RRH	retinal pigment epithelium-derived rhodopsin homolog	NM_001079759 /// XM_001234118	0.0423156	0.632431	1.29458	1.29458	3.01909	1
GgaAffx.9960.1.S1_at	422878	HTT	huntingtin	XM_420822	0.00881709	0.00149067	1.29449	1.29449	4.56233	1
GgaAffx.8204.2.S1_s_at	421635	ZBTB2	zinc finger and BTB domain containing 2	NM_001031070	0.307597	0.0647314	1.29447	1.29447	1.28929	1
Gga.14222.1.S1_at	---	---	---	---	0.0844221	0.0265105	1.29434	1.29434	2.39721	1
GgaAffx.22083.1.S1_s_at	422265	KLHL4	kelch-like 4 (Drosophila)	XM_420250	0.0665553	0.0462974	1.29432	1.29432	2.60803	1
GgaAffx.21174.1.S1_at	415387	LOC415387	Hypothetical LOC415387	XM_413772	0.0263634	0.0179475	1.29425	1.29425	3.46374	1
Gga.2689.1.S1_at	421909	ACP1	acid phosphatase 1, soluble	NM_001039291	0.440827	0.0902041	1.2941	1.2941	0.97965	1
GgaAffx.25873.1.S1_s_at	425121	KLHL5	kelch-like 5 (Drosophila)	XM_422912	0.0809944	0.036422	1.29383	1.29383	2.43373	1
Gga.19049.1.S1_at	395312	IL18	interleukin 18 (interferon-gamma-inducing factor)	NM_204608	0.0919226	0.0369453	1.2938	1.2938	2.3225	1
Gga.13367.1.S1_at	424863	AMOTL2	angiomotin like 2	XM_422675	0.188257	0.0975823	1.29368	1.29368	1.70562	1
Gga.15378.2.S1_x_at	422010	STMN4	Stathmin-like 4	XM_420017	0.0892094	0.0119335	1.29366	1.29366	2.34876	1
Gga.11486.1.S1_at	425468 /// 771147	RPL9	ribosomal protein L9	XM_001234444 /// XM_423225	0.0355785	0.019311	1.29353	1.29353	3.18015	1
Gga.18645.1.S1_at	---	---	---	---	0.441518	0.0656453	1.29343	1.29343	0.978278	1
GgaAffx.25800.1.S1_s_at	776927	LOC776927	similar to HBxAg transactivated protein 2	XM_001236418	0.242426	0.0967883	1.2934	1.2934	1.49125	1
GgaAffx.11778.1.S1_s_at	418431	ARL13B	ADP-ribosylation factor-like 13B	XM_416642	0.0676512	0.136252	1.29337	1.29337	2.59345	1
GgaAffx.2986.1.S1_at	423722	C10orf56	chromosome 10 open reading frame 56	XM_421599	0.00362519	0.0144737	1.29335	1.29335	5.53546	1
Gga.16864.1.S1_at	---	---	---	---	0.214853	0.426161	1.29308	1.29308	1.59353	1
Gga.8852.2.S1_at	770481 /// 770742 /// 771926 /// 777154	LOC770481 /// LOC770742 /// LOC771926 /// LOC777154	hypothetical protein LOC770481 /// hypothetical protein LOC770742 /// hypothetic	XM_001233818 /// XM_001234067 /// XM_001235134 /// XM_001236625	0.52434	0.438253	1.29287	1.29287	0.825583	1
Gga.17193.1.S1_at	422241	SLC9A6	solute carrier family 9 (sodium/hydrogen exchanger), member 6	XM_420229	0.0160636	0.00600981	1.29267	1.29267	3.94793	1
GgaAffx.23483.1.S1_s_at	422601	HNRPDL	heterogeneous nuclear ribonucleoprotein D-like	NM_001031142	0.0340106	0.0716277	1.29263	1.29263	3.22236	1
Gga.14641.1.S1_at	---	---	---	---	0.215481	0.0711894	1.29241	1.29241	1.59106	1
Gga.17628.1.S1_at	---	---	---	---	0.0409782	0.0407461	1.29219	1.29219	3.04876	1
Gga.226.1.S1_at	395420	F13A1	coagulation factor XIII, A1 polypeptide	NM_204685	0.822023	0.30904	1.29218	1.29218	0.377421	1
Gga.19226.1.S1_at	---	---	---	---	0.00189527	0.0466975	1.29216	1.29216	6.29764	1
GgaAffx.23292.1.S1_at	421490	KIF26B	kinesin family member 26B	XM_419537	0.0543899	0.020881	1.29214	1.29214	2.78962	1
Gga.6514.1.S1_a_at	419685	LYPLA2	lysophospholipase II	NM_001162382 /// XM_417832	0.0756145	0.00700939	1.2921	1.2921	2.4945	1
GgaAffx.9512.2.S1_s_at	421069	MIB1	mindbomb homolog 1 (Drosophila)	XM_419157	0.0500662	0.00346197	1.292	1.292	2.86488	1
Gga.7331.2.S1_a_at	418614	RAI2	retinoic acid induced 2	XM_416813	0.0724677	0.0298018	1.29178	1.29178	2.53221	1
GgaAffx.20829.1.S1_at	---	---	---	---	0.26553	0.0445805	1.29174	1.29174	1.41412	1
Gga.1047.1.S1_at	---	---	---	---	0.0868563	0.0269411	1.29172	1.29172	2.37222	1
GgaAffx.11133.1.A1_s_at	768853	ARPP19	cAMP-regulated phosphoprotein, 19kDa	NM_001081707 /// XM_001231465	0.0894896	0.0154014	1.29146	1.29146	2.34601	1
Gga.16500.1.S1_at	---	---	---	---	0.423299	0.144848	1.2912	1.2912	1.01507	1
Gga.748.1.S1_at	396512	FOS	FBJ murine osteosarcoma viral oncogene homolog	NM_205508	0.0396191	0.0105077	1.29108	1.29108	3.07999	1
GgaAffx.20516.1.S1_s_at	---	---	---	---	0.333205	0.270355	1.29106	1.29106	1.22115	1
Gga.14851.1.S1_at	---	---	---	---	0.101458	0.0310003	1.29086	1.29086	2.23633	1
Gga.8447.1.S1_at	395094	FGFBP2	fibroblast growth factor binding protein 2	NM_204447	0.415062	0.181967	1.29085	1.29085	1.03217	1
Gga.13922.1.S1_at	---	---	---	---	0.436614	0.311862	1.29077	1.29077	0.98805	1
GgaAffx.26222.1.S1_at	---	---	---	---	0.0265802	0.00829602	1.29073	1.29073	3.4559	1
Gga.2087.1.S1_s_at	378891	CSNK1E	casein kinase 1, epsilon	NM_204377	0.896661	0.35052	1.29048	1.29048	0.265463	1
Gga.2858.1.S1_s_at	423675	PTEN	Phosphatase and tensin homolog (mutated in multiple advanced cancers 1)	XM_421555	0.0920543	0.02709	1.29039	1.29039	2.32125	1
Gga.10846.1.S1_at	---	---	---	---	0.351121	0.116825	1.2901	1.2901	1.17637	1
Gga.20033.1.S1_at	425024	CCNL1	cyclin L1	XM_422826	0.00716443	0.000584074	1.28963	1.28963	4.78262	1
Gga.4178.1.S1_s_at	418955	PSPC1	paraspeckle component 1	NM_001030831	0.000564084	0.00189815	1.28962	1.28962	7.85354	1
Gga.11883.2.S1_at	421142	ASPH	Aspartate beta-hydroxylase	XM_419224	0.100287	0.0436523	1.28941	1.28941	2.24643	1
Gga.8506.1.S1_s_at	378919	TRIB2	tribbles homolog 2 (Drosophila)	NM_204401	0.123791	0.06222	1.28912	1.28912	2.06399	1
GgaAffx.24000.1.S1_at	420869	DSP	desmoplakin	XM_001231410 /// XM_418957	0.296481	0.111963	1.28908	1.28908	1.32058	1
GgaAffx.24123.1.S1_at	418185	PDE3A	phosphodiesterase 3A, cGMP-inhibited	XM_416416	0.118855	0.123799	1.28904	1.28904	2.0991	1
GgaAffx.20759.1.S1_at	---	---	---	---	0.202733	0.110261	1.28879	1.28879	1.64275	1
Gga.19877.1.S1_at	417517	MDH2	Malate dehydrogenase 2, NAD (mitochondrial)	XM_415765	0.0789639	0.0125395	1.2887	1.2887	2.45615	1
Gga.17472.1.S1_at	422515	FAM13A1	family with sequence similarity 13, member A1	XM_420478	0.115158	0.0292616	1.2884	1.2884	2.12641	1
GgaAffx.23947.1.S1_at	418065	PRDM4	PR domain containing 4	XM_416301	0.0049792	0.000340078	1.28828	1.28828	5.17889	1
Gga.11309.1.S1_at	420553	LOC420553	similar to 1-aminocyclopropane-1-carboxylate synthase	XM_418654	0.332585	0.124533	1.28827	1.28827	1.22274	1
GgaAffx.2074.1.S1_at	415364	TBC1D2B	TBC1 domain family, member 2B	XM_413750	0.129516	0.308872	1.28824	1.28824	2.02506	1
GgaAffx.21011.1.S1_at	---	---	---	---	0.103966	0.0239111	1.28804	1.28804	2.21508	1
Gga.16406.1.S1_at	---	---	---	---	0.0736447	0.0353094	1.28794	1.28794	2.51791	1
Gga.15988.1.S1_at	---	---	---	---	0.221628	0.0533104	1.28788	1.28788	1.56722	1
Gga.5572.3.S1_at	---	---	---	---	0.0825148	0.00604112	1.28774	1.28774	2.41734	1
GgaAffx.22381.3.S1_at	428253	ANKK1	ankyrin repeat and kinase domain containing 1	NM_001128828 /// XM_425812	0.114921	0.116457	1.2877	1.2877	2.1282	1
GgaAffx.25423.1.S1_at	408044	PPL	periplakin	XM_414712	0.13037	0.0579574	1.28759	1.28759	2.01941	1
Gga.15961.1.S1_s_at	421039	CEP76	centrosomal protein 76kDa	XM_419124	0.0343233	0.00189122	1.28741	1.28741	3.21377	1
GgaAffx.10018.2.S1_s_at	422902	SLBP	stem-loop (histone) binding protein	NM_001004403	0.138359	0.100547	1.28736	1.28736	1.96833	1
Gga.16413.4.S1_at	419263	STMN3	stathmin-like 3	NM_001004393	0.47583	0.387651	1.28724	1.28724	0.912379	1
Gga.10461.2.S1_a_at	421886	HMGCLL1	3-hydroxymethyl-3-methylglutaryl-Coenzyme A lyase-like 1	XM_419903	0.0272663	0.0105558	1.28713	1.28713	3.43155	1
Gga.5362.1.S1_a_at	428948	PDLIM1	PDZ and LIM domain 1 (elfin)	XM_001232673 /// XM_001232711 /// XM_001232727 /// XM_426503	0.0871828	0.0502006	1.28711	1.28711	2.36892	1
GgaAffx.21620.1.S1_at	---	---	---	---	0.365799	0.285802	1.28707	1.28707	1.14126	1
GgaAffx.25498.1.S1_at	416801	MMP17	matrix metallopeptidase 17 (membrane-inserted)	XM_415092	0.160867	0.0465257	1.28677	1.28677	1.83942	1
GgaAffx.25609.2.S1_s_at	424000	NCKAP1	NCK-associated protein 1	XM_001232274 /// XM_001232334 /// XM_421856	0.0356389	0.00919694	1.2866	1.2866	3.17856	1
Gga.10714.1.S1_at	417810	AMIGO2	adhesion molecule with Ig-like domain 2	XM_416052	0.40005	0.218006	1.28651	1.28651	1.06411	1
Gga.9329.1.S1_at	425709	ILF2	interleukin enhancer binding factor 2, 45kDa	XM_423437	0.00325549	0.00145485	1.28645	1.28645	5.65871	1
Gga.13612.1.S1_at	---	---	---	---	8.12428e-05	0.00158223	1.28639	1.28639	10.7523	1
Gga.12499.2.S1_a_at	416455	C7orf50	chromosome 7 open reading frame 50	XM_414763	0.0196253	0.168508	1.28626	1.28626	3.74979	1
Gga.11919.1.S1_s_at	417717	ZRF1	zuotin related factor 1	XM_415961	0.00332661	0.00117015	1.28615	1.28615	5.63384	1
Gga.3093.1.S1_at	396171	YAP1	Yes-associated protein 1, 65kDa	NM_205243	0.165048	0.0407616	1.28602	1.28602	1.81755	1
Gga.16407.1.S1_at	---	---	---	---	0.000842527	0.00108712	1.28574	1.28574	7.31839	1
GgaAffx.12762.1.S1_s_at	415716	AYTL1	acyltransferase like 1	NM_001030568	0.016047	0.104323	1.28572	1.28572	3.94896	1
Gga.11646.1.S1_at	417439	FAM20A	family with sequence similarity 20, member A	XM_415690	0.573518	0.144491	1.28539	1.28539	0.743662	1
Gga.11117.1.S1_at	418861	RCBTB2	regulator of chromosome condensation (RCC1) and BTB (POZ) domain containing prot	XM_417055	0.159412	0.0145893	1.28509	1.28509	1.84717	1
Gga.19413.1.S1_at	426058	LOC426058	Hypothetical LOC426058	XR_026937	0.0311506	0.00261174	1.28499	1.28499	3.30505	1
Gga.4497.1.S1_at	---	---	---	---	0.118204	0.12724	1.28497	1.28497	2.10384	1
GgaAffx.26714.1.S1_s_at	416569	RBBP6	retinoblastoma binding protein 6	XM_414870	0.185745	0.0457233	1.28496	1.28496	1.71703	1
Gga.13585.1.S1_s_at	417439	FAM20A	family with sequence similarity 20, member A	XM_415690	0.491401	0.150937	1.28468	1.28468	0.883776	1
GgaAffx.26131.1.S1_at	415401	SLTM	SAFB-like, transcription modulator	XM_413786	0.266297	0.0495503	1.28456	1.28456	1.41168	1
Gga.14355.1.S1_at	427211	IQGAP2	IQ motif containing GTPase activating protein 2	XR_026642	0.213711	0.0556453	1.28454	1.28454	1.59804	1
GgaAffx.25871.1.S1_at	427435	LOC427435	KPL2 protein-like	XM_425007	0.509407	0.117427	1.28431	1.28431	0.851597	1
Gga.7215.1.S1_at	424367	HSD17B7	hydroxysteroid (17-beta) dehydrogenase 7	XM_001232165 /// XM_422210	0.0228225	0.0378201	1.2843	1.2843	3.60265	1
Gga.10106.1.S1_at	422246	VGLL1	vestigial like 1 (Drosophila)	XM_420234	0.00953234	0.00351201	1.28428	1.28428	4.4806	1
GgaAffx.2804.1.S1_s_at	424435	TNN	tenascin N	XM_001233252	0.0846063	0.102228	1.28428	1.28428	2.3953	1
GgaAffx.9618.1.S1_at	427250	LOC427250	similar to KIAA1412 protein	XR_027225	0.116979	0.0306991	1.28412	1.28412	2.11285	1
Gga.6815.1.A1_at	---	---	---	---	0.0118165	0.00367726	1.28403	1.28403	4.2584	1
Gga.4661.1.S1_x_at	429035	TUBA1C	Tubulin, alpha 1c	XM_426592	0.079984	0.00640489	1.28403	1.28403	2.44481	1
GgaAffx.11557.1.S1_s_at	426574	NOL5A	nucleolar protein 5A (56kDa with KKE/D repeat)	NM_001031388	0.0560779	0.00479018	1.28388	1.28388	2.76196	1
Gga.2408.1.S1_at	418193	BCAT1	branched chain aminotransferase 1, cytosolic	XM_416424	0.243794	0.101374	1.28378	1.28378	1.48648	1
GgaAffx.11429.1.S1_s_at	418983	MMP7	matrix metallopeptidase 7 (matrilysin, uterine)	NM_001006278	0.227684	0.123818	1.28373	1.28373	1.54439	1
Gga.2576.1.S1_at	395558 /// 420518	PTPLA	protein tyrosine phosphatase-like (proline instead of catalytic arginine), membe	XM_418620	0.284724	0.0578462	1.28343	1.28343	1.35494	1
Gga.14054.1.S1_at	---	---	---	---	0.292516	0.153682	1.2831	1.2831	1.33202	1
GgaAffx.24388.1.S1_at	418256	MFAP5	microfibrillar associated protein 5	XM_416482	0.00566592	0.0981179	1.28308	1.28308	5.03668	1
GgaAffx.21019.1.S1_at	426208	WDR76	WD repeat domain 76	XM_423870	0.101668	0.0231858	1.28307	1.28307	2.23453	1
GgaAffx.8868.4.S1_s_at	421052	FAM38B	family with sequence similarity 38, member B	XM_419138	0.254069	0.138315	1.28295	1.28295	1.45151	1
Gga.13172.1.S1_at	---	---	---	---	0.0285106	0.0221251	1.28285	1.28285	3.38901	1
Gga.10519.1.S1_at	424491	TECR	Trans-2,3-enoyl-CoA reductase	XM_422331	0.20966	0.275665	1.28277	1.28277	1.61427	1
Gga.10834.1.S1_at	415743	NETO2	neuropilin (NRP) and tolloid (TLL)-like 2	XM_414109	0.333447	0.164383	1.2826	1.2826	1.22053	1
GgaAffx.934.1.S1_at	417491	MYBBP1A	MYB binding protein (P160) 1a	XM_415739	0.259168	0.180162	1.2824	1.2824	1.43468	1
Gga.4511.1.S1_at	395472	TCIRG1	T-cell, immune regulator 1, ATPase, H+ transporting, lysosomal V0 subunit A3	NM_204722	0.0993814	0.071907	1.28235	1.28235	2.25434	1
Gga.9931.1.S1_at	425332	LOC425332	similar to BC039210 protein	XM_423106	0.0920023	0.0433741	1.2822	1.2822	2.32174	1
GgaAffx.2518.1.S1_at	415395	THSD4	thrombospondin, type I, domain containing 4	XM_413780	0.604872	0.138506	1.28208	1.28208	0.693968	1
GgaAffx.199.1.S1_at	771632	PIGV	phosphatidylinositol glycan anchor biosynthesis, class V	XR_026778	0.059561	0.00425401	1.28183	1.28183	2.7076	1
Gga.10257.2.S1_a_at	419520	SLC23A2	solute carrier family 23 (nucleobase transporters), member 2	NM_001145227 /// XM_417671	0.0234122	0.0695671	1.28181	1.28181	3.57796	1
Gga.5089.1.A1_at	---	---	---	---	0.00731993	0.0120896	1.28178	1.28178	4.75964	1
Gga.17027.1.S1_at	---	---	---	---	0.0618533	0.0640916	1.28156	1.28156	2.67365	1
GgaAffx.7318.1.S1_at	419097	LRP6	low density lipoprotein receptor-related protein 6	XM_417286	0.0828796	0.0128468	1.28126	1.28126	2.41345	1
GgaAffx.7825.1.S1_at	424297	THSD7B	thrombospondin, type I, domain containing 7B	XM_422142	0.00494383	0.0116835	1.28123	1.28123	5.18679	1
Gga.8202.2.S1_a_at	425104	ZFAND2A	zinc finger, AN1-type domain 2A	XM_422896	0.327595	0.20447	1.28065	1.28065	1.23564	1
Gga.14928.1.S1_at	---	---	---	---	0.1397	0.0204389	1.28062	1.28062	1.96006	1
Gga.2485.1.S1_s_at	421878	PRIM2	primase, DNA, polypeptide 2 (58kDa)	NM_001012880	0.379287	0.185162	1.28059	1.28059	1.11012	1
GgaAffx.20862.1.S1_s_at	424666	PPAP2B	phosphatidic acid phosphatase type 2B	NM_001130488 /// XM_422500	0.0164755	0.00408623	1.28058	1.28058	3.92269	1
GgaAffx.10422.3.S1_s_at	421885	COL21A1	collagen, type XXI, alpha 1	XM_419902	0.178201	0.304469	1.28035	1.28035	1.75227	1
Gga.7514.1.S1_at	428659	CAD	carbamoyl-phosphate synthetase 2, aspartate transcarbamylase, and dihydroorotase	XR_027188	0.271091	0.051611	1.28024	1.28024	1.39655	1
Gga.7759.1.S1_a_at	417846	CCT2	chaperonin containing TCP1, subunit 2 (beta)	NM_001012533	0.0225855	0.0206739	1.28006	1.28006	3.61277	1
GgaAffx.12504.1.S1_s_at	426609	NAT10	N-acetyltransferase 10	NM_001012940	0.138295	0.0860952	1.28004	1.28004	1.96873	1
GgaAffx.26441.1.S1_at	424460	LOC424460	hypothetical LOC424460	XM_430154	0.113341	0.0877952	1.27997	1.27997	2.14017	1
Gga.12405.2.S1_a_at	419847	MAPKAPK2	mitogen-activated protein kinase-activated protein kinase 2	XM_417976	0.0893135	0.103568	1.27989	1.27989	2.34773	1
GgaAffx.133.1.S1_at	415603	MCC	mutated in colorectal cancers	XM_413971	0.147872	0.0457642	1.27978	1.27978	1.91137	1
Gga.5561.1.S1_at	424316	RIF1	RAP1 interacting factor homolog (yeast)	XM_422162	0.0759562	0.0240811	1.27975	1.27975	2.4905	1
Gga.13197.1.S1_at	420130	MAST3	Microtubule associated serine/threonine kinase 3	XM_418247	0.151436	0.0264747	1.27965	1.27965	1.89101	1
GgaAffx.22647.2.S1_s_at	417739	MAPK11	mitogen-activated protein kinase 11	NM_001006227	0.145127	0.114079	1.27957	1.27957	1.92741	1
NC-000899.CDS27.S1_at	---	---	---	---	0.207968	0.0847028	1.27941	1.27941	1.62114	1
GgaAffx.12331.1.S1_at	424631	RNF11	ring finger protein 11	NM_001006540	0.0690022	0.0867575	1.27936	1.27936	2.57582	1
Gga.20063.1.S1_at	---	---	---	---	0.283959	0.0533767	1.27932	1.27932	1.35722	1
GgaAffx.5089.1.S1_at	424060	PLCL1	phospholipase C-like 1	XM_421916	0.107829	0.0528303	1.27919	1.27919	2.18338	1
Gga.9980.2.S1_a_at	771191	LOC771191	similar to HEXIM1 protein	XR_026758	0.53005	0.110893	1.27888	1.27888	0.815787	1
GgaAffx.24796.1.S1_at	420212	WWP1	WW domain containing E3 ubiquitin protein ligase 1	NM_001012554	0.100732	0.0326476	1.27877	1.27877	2.24258	1
GgaAffx.9779.1.S1_at	418402	LRRIQ2	leucine-rich repeats and IQ motif containing 2	XM_416617	0.00561436	0.0102268	1.27877	1.27877	5.04669	1
Gga.4424.1.S1_at	395201	SH3GL3	SH3-domain GRB2-like 3	NM_204528	0.0665304	0.105512	1.27877	1.27877	2.60837	1
Gga.20027.1.S1_s_at	---	---	---	---	0.127811	0.0848465	1.27875	1.27875	2.03646	1
Gga.3871.1.S1_at	423081	GTF2H1	general transcription factor IIH, polypeptide 1, 62kDa	XM_421013	0.109913	0.134734	1.27874	1.27874	2.16678	1
GgaAffx.257.1.S1_s_at	419807	RBM15	RNA binding motif protein 15	XM_417944	0.0653004	0.0202366	1.27865	1.27865	2.62505	1
GgaAffx.22824.1.S1_s_at	424130	OSBPL6	oxysterol binding protein-like 6	XM_001233035 /// XM_421982	0.196595	0.0399431	1.2786	1.2786	1.66883	1
GgaAffx.4996.1.S1_at	422338	ALG13	asparagine-linked glycosylation 13 homolog (S. cerevisiae)	XM_420311	0.0088019	0.00985292	1.27833	1.27833	4.56414	1
Gga.7640.1.S1_a_at	422345	ACSL4	acyl-CoA synthetase long-chain family member 4	XM_420317	0.158831	0.116171	1.27808	1.27808	1.85029	1
GgaAffx.8393.3.S1_s_at	425953 /// 430627	GRAMD4 /// LOC425953	GRAM domain containing 4 /// similar to KIAA0767 protein	XM_428182 /// XR_026837	0.00147308	0.032372	1.27786	1.27786	6.60656	1
Gga.1161.1.S1_at	419793	SDHD	succinate dehydrogenase complex, subunit D, integral membrane protein	NM_001006321	0.139755	0.0563388	1.27781	1.27781	1.95972	1
GgaAffx.6568.1.S1_at	428741	MMRN1	multimerin 1	XM_426299	0.0193507	0.00930268	1.27753	1.27753	3.76362	1
Gga.15323.1.S1_at	---	---	---	---	0.0705161	0.0350686	1.27748	1.27748	2.55649	1
Gga.9600.2.S1_at	416574	DCTN5	dynactin 5 (p25)	XM_414875	0.426697	0.108182	1.27738	1.27738	1.00811	1
GgaAffx.21621.1.S1_s_at	---	---	---	---	0.229867	0.0810437	1.27731	1.27731	1.5363	1
Gga.9686.2.S1_a_at	420183	RDH10	retinol dehydrogenase 10 (all-trans)	XM_418296	0.691269	0.272771	1.27715	1.27715	0.564388	1
GgaAffx.11892.1.S1_at	431605	PSIP1	PC4 and SFRS1 interacting protein 1	NM_001031610	0.000770118	0.00340893	1.27712	1.27712	7.43647	1
Gga.18219.1.S1_at	---	---	---	---	0.00821085	0.0373218	1.27694	1.27694	4.63747	1
GgaAffx.10906.1.S1_at	428073	LOC428073	similar to LOC563523 protein	XM_425631	0.0847758	0.139333	1.27686	1.27686	2.39353	1
Gga.14303.2.S1_s_at	419027	GAB2	GRB2-associated binding protein 2	XM_001234548	0.0175483	0.00400005	1.27685	1.27685	3.86005	1
Gga.340.1.S1_at	396321	CHRNA6	cholinergic receptor, nicotinic, alpha 6	NM_205364	0.142793	0.138226	1.27681	1.27681	1.94129	1
Gga.14.1.S1_at	374109	SEMA3F	sema domain, immunoglobulin domain (Ig), short basic domain, secreted, (semaphor	NM_204258	0.563819	0.14557	1.2768	1.2768	0.759406	1
Gga.12539.2.S1_at	417456	NPLOC4	Nuclear protein localization 4 homolog (S. cerevisiae)	XM_415704	0.0137239	0.00217039	1.27673	1.27673	4.10607	1
Gga.11726.1.S1_a_at	429929	GADD45B	Growth arrest and DNA-damage-inducible, beta	NM_001044666 /// XM_001232965	0.00256626	0.013932	1.2765	1.2765	5.93569	1
Gga.2995.1.S1_at	421185	SRPK1	SFRS protein kinase 1	XM_419265	0.000452017	4.19247e-05	1.27639	1.27639	8.15794	1
Gga.10463.1.S1_s_at	423190	CKAP5	cytoskeleton associated protein 5	XM_001233232 /// XM_421115	0.0387058	0.0306172	1.27635	1.27635	3.10164	1
GgaAffx.6948.3.S1_s_at	417880	TMTC2	transmembrane and tetratricopeptide repeat containing 2	XM_416123	0.102708	0.039393	1.2762	1.2762	2.22566	1
GgaAffx.23330.1.S1_at	424666	PPAP2B	phosphatidic acid phosphatase type 2B	NM_001130488 /// XM_422500	0.076402	0.0447286	1.27617	1.27617	2.48532	1
Gga.17667.1.S1_at	---	---	---	---	0.0405361	0.026377	1.27617	1.27617	3.05879	1
Gga.12157.1.S1_at	421390	LOC421390	hypothetical LOC421390	XR_027095	0.0167203	0.173982	1.27611	1.27611	3.90802	1
GgaAffx.3934.1.S1_at	771171	LOC771171	hypothetical protein LOC771171	XM_001234465	0.0922124	0.0438166	1.27581	1.27581	2.31974	1
Gga.10425.1.S1_s_at	396189	VSNL1	visinin-like 1	NM_205255	0.572033	0.472461	1.2758	1.2758	0.74606	1
Gga.12573.1.S1_at	---	---	---	---	0.119156	0.0965895	1.27571	1.27571	2.09692	1
Gga.2888.1.S1_at	373992	FBN1	fibrillin 1	XM_413815	0.0108294	0.00532755	1.27563	1.27563	4.34812	1
Gga.16099.1.S1_s_at	426499	LOC426499	Similar to importin beta subunit	XR_027119	0.465528	0.0987638	1.27551	1.27551	0.931732	1
Gga.19567.1.S1_at	---	---	---	---	0.345259	0.221791	1.27542	1.27542	1.19078	1
GgaAffx.22712.1.S1_at	424116	PDE1A	phosphodiesterase 1A, calmodulin-dependent	XM_421969	0.324001	0.0464926	1.2754	1.2754	1.24504	1
Gga.5592.1.S1_s_at	422004	ESCO2	establishment of cohesion 1 homolog 2 (S. cerevisiae)	XM_420012	0.0669837	0.0170129	1.27536	1.27536	2.6023	1
Gga.7075.1.S1_s_at	---	---	---	---	0.014237	0.00171416	1.27532	1.27532	4.069	1
GgaAffx.24000.1.S1_s_at	420869	DSP	desmoplakin	XM_001231410 /// XM_418957	0.0854508	0.0629925	1.27525	1.27525	2.38656	1
Gga.14865.1.S1_at	---	---	---	---	0.338661	0.34549	1.27483	1.27483	1.20728	1
GgaAffx.8040.1.S1_s_at	418078	ALDH1L2	aldehyde dehydrogenase 1 family, member L2	XM_416314	0.000397381	0.0565646	1.27479	1.27479	8.33801	1
Gga.15965.1.S1_at	---	---	---	---	0.109473	0.116826	1.27478	1.27478	2.17026	1
Gga.14195.1.S1_at	---	---	---	---	0.115861	0.138975	1.27474	1.27474	2.12115	1
GgaAffx.20496.1.S1_at	---	---	---	---	0.214446	0.0235773	1.27451	1.27451	1.59514	1
GgaAffx.8513.1.S1_s_at	426048	NCLN	nicalin homolog (zebrafish)	NM_001031354	0.185776	0.0973526	1.27449	1.27449	1.71689	1
Gga.3823.1.S2_at	374116	PER2	period homolog 2 (Drosophila)	NM_204262	0.0951326	0.0182998	1.27444	1.27444	2.29248	1
NC-001958.CDS14.S1_at	---	---	---	---	0.0447809	0.00305948	1.2743	1.2743	2.96696	1
GgaAffx.2172.1.S1_s_at	424010	BARD1	BRCA1 associated RING domain 1	NM_001031246	0.406922	0.392352	1.27425	1.27425	1.04936	1
Gga.6321.1.S1_a_at	421149	UBE2T	ubiquitin-conjugating enzyme E2T (putative)	XM_419230	0.0471003	0.0331547	1.27414	1.27414	2.92065	1
GgaAffx.12709.1.S1_at	426667	PRPF3	PRP3 pre-mRNA processing factor 3 homolog (S. cerevisiae)	NM_001031390	0.0889972	0.0202857	1.27409	1.27409	2.35084	1
GgaAffx.11323.1.S1_at	416605	SMG1	SMG1 homolog, phosphatidylinositol 3-kinase-related kinase (C. elegans)	XM_414907	0.257674	0.0372799	1.27404	1.27404	1.43958	1
Gga.11581.2.S1_a_at	422194	TMEM35	transmembrane protein 35	XM_420189	0.0106449	0.00105708	1.27393	1.27393	4.36589	1
GgaAffx.13008.1.S1_at	420463	KLF6	Kruppel-like factor 6	NM_001030969	0.0133672	0.0295708	1.27392	1.27392	4.13273	1
GgaAffx.26527.1.S1_at	416276	TCOF1	Treacher Collins-Franceschetti syndrome 1	NM_001012785	0.119089	0.0158768	1.2738	1.2738	2.0974	1
GgaAffx.2014.2.S1_s_at	417565	TSR1	TSR1, 20S rRNA accumulation, homolog (S. cerevisiae)	XM_001234319	0.0279777	0.00705036	1.27361	1.27361	3.40698	1
Gga.7331.1.S1_at	418614	RAI2	retinoic acid induced 2	XM_416813	0.171768	0.0263414	1.27347	1.27347	1.78355	1
GgaAffx.26187.1.S1_at	416855	WDR66	WD repeat domain 66	XM_415147	0.0362936	0.0109675	1.27321	1.27321	3.16156	1
GgaAffx.5725.1.S1_s_at	424975	ACTL6A	actin-like 6A	XM_422784	0.174865	0.0613296	1.27281	1.27281	1.76834	1
Gga.15285.1.S1_at	---	---	---	---	0.254864	0.0684401	1.27279	1.27279	1.44887	1
Gga.4051.1.S1_at	374135	CTGF	connective tissue growth factor	NM_204274	0.0745531	0.0107048	1.27269	1.27269	2.50703	1
Gga.11029.1.S1_at	415389	TARSL2	threonyl-tRNA synthetase-like 2	XM_413774	0.105819	0.0257762	1.27259	1.27259	2.19973	1
GgaAffx.25330.1.S1_at	427046	SAFB2	scaffold attachment factor B2	XM_424644	0.140369	0.0308403	1.27259	1.27259	1.95596	1
GgaAffx.990.1.S1_at	419607	FHL3	four and a half LIM domains 3	XM_417754	0.0567396	0.0413859	1.27255	1.27255	2.75136	1
GgaAffx.12848.1.S1_at	421403	LRPPRC	leucine-rich PPR-motif containing	XM_001234902	0.192062	0.0479118	1.27255	1.27255	1.68863	1
Gga.13457.1.S1_at	---	---	---	---	0.282426	0.540092	1.27244	1.27244	1.36181	1
GgaAffx.22893.1.S1_s_at	424149	ZAK	sterile alpha motif and leucine zipper containing kinase AZK	XM_421996	0.17682	0.0235653	1.2724	1.2724	1.75889	1
Gga.19639.1.S1_at	416803	GPR133	G protein-coupled receptor 133	XM_415094	0.0725351	0.0145341	1.27222	1.27222	2.53139	1
GgaAffx.12959.1.S1_at	424573	IPO13	importin 13	NM_001006537	0.176374	0.0302738	1.27184	1.27184	1.76104	1
GgaAffx.6988.1.A1_at	---	---	---	---	0.0206	0.00586138	1.27179	1.27179	3.70234	1
GgaAffx.5868.4.S1_at	428873	PAPLN	papilin, proteoglycan-like sulfated glycoprotein	XM_426430	0.0140303	0.00288134	1.27162	1.27162	4.08375	1
Gga.2460.1.S1_at	395802	PROX1	prospero-related homeobox 1	NM_001005616	0.0547561	0.0372816	1.27141	1.27141	2.78354	1
GgaAffx.20301.1.S1_at	---	---	---	---	0.136691	0.0346398	1.27097	1.27097	1.97874	1
GgaAffx.12426.1.S1_s_at	424883	PLSCR1	phospholipid scramblase 1	XM_001231236 /// XM_422696	0.232962	0.0930746	1.27094	1.27094	1.52498	1
Gga.552.1.S1_at	395939	DIO3	deiodinase, iodothyronine, type III	NM_001122648 /// XM_426465	0.312079	0.573679	1.2709	1.2709	1.27698	1
Gga.15742.1.S1_at	426876	LARP4	La ribonucleoprotein domain family, member 4	NM_001012700	0.00854868	0.000592175	1.27085	1.27085	4.59488	1
GgaAffx.26288.1.S1_s_at	415419	MAPK6	mitogen-activated protein kinase 6	NM_001030549	0.0155214	0.00722515	1.27072	1.27072	3.98224	1
GgaAffx.26239.1.S1_at	415764	ZNF507	zinc finger protein 507	XM_414126	0.262717	0.0474691	1.27061	1.27061	1.42315	1
GgaAffx.1552.1.S1_s_at	431656	LOC431656	hypothetical LOC431656	XM_429208	0.137268	0.139003	1.27049	1.27049	1.97512	1
GgaAffx.7991.1.S1_s_at	431669	RMI1	RMI1, RecQ mediated genome instability 1, homolog (S. cerevisiae)	NM_001031612	0.0371283	0.00303496	1.27007	1.27007	3.14035	1
Gga.18343.1.S1_s_at	427327	RASA1	RAS p21 protein activator (GTPase activating protein) 1	XM_424907	0.212251	0.0338907	1.27003	1.27003	1.60386	1
GgaAffx.11902.1.S1_s_at	419865	WDR77	WD repeat domain 77	NM_001030916	0.139116	0.0934044	1.26998	1.26998	1.96365	1
GgaAffx.5438.3.S1_s_at	428421	LOC428421	similar to mannose receptor C1	XM_425982	0.264242	0.0715696	1.26997	1.26997	1.41825	1
GgaAffx.11513.1.S1_s_at	420231	CCNE2	cyclin E2	NM_001030945	0.0238764	0.0622428	1.26986	1.26986	3.559	1
Gga.7903.2.S1_a_at	419561	CTPS	CTP synthase	XM_417709	0.0310108	0.00782735	1.26985	1.26985	3.30931	1
GgaAffx.12252.1.S1_at	423845	RRP12	ribosomal RNA processing 12 homolog (S. cerevisiae)	NM_001012908	0.169623	0.0317852	1.26974	1.26974	1.79425	1
GgaAffx.7657.1.S1_at	422692	TIFA	TRAF-interacting protein with forkhead-associated domain	XM_420645	0.515646	0.228371	1.26944	1.26944	0.840658	1
GgaAffx.20263.1.S1_s_at	420444	RBM33	RNA binding motif protein 33	XM_418548	0.662974	0.210746	1.26943	1.26943	0.605868	1
Gga.724.1.S1_at	424139	HOXD4	homeobox D4	XM_001233267 /// XM_421990	0.108934	0.0366827	1.26934	1.26934	2.17454	1
Gga.6637.1.S1_at	---	---	---	---	0.0068445	0.0562889	1.26897	1.26897	4.83166	1
GgaAffx.3464.1.S1_at	416002	APPL1	adaptor protein, phosphotyrosine interaction, PH domain and leucine zipper conta	XM_414344	0.251753	0.103272	1.26885	1.26885	1.45927	1
GgaAffx.6319.1.S1_at	428572	KIF6	kinesin family member 6	XR_027130	0.000458032	0.000426456	1.26871	1.26871	8.13959	1
Gga.11932.1.S1_at	420154	UHRF1	ubiquitin-like, containing PHD and RING finger domains, 1	XM_418269	0.0306031	0.0818311	1.26859	1.26859	3.32182	1
Gga.14620.1.S1_at	---	---	---	---	0.151474	0.0187801	1.26854	1.26854	1.89079	1
Gga.1171.1.S2_at	395550	LY6E	lymphocyte antigen 6 complex, locus E	NM_204775	0.262456	0.0498551	1.26822	1.26822	1.42399	1
GgaAffx.26461.2.S1_s_at	424466	CDC14A	CDC14 cell division cycle 14 homolog A (S. cerevisiae)	NM_001177736 /// XR_026921	0.105422	0.290149	1.26814	1.26814	2.20299	1
Gga.11983.1.S1_s_at	419823	MDM4	Mdm4, transformed 3T3 cell double minute 4, p53 binding protein (mouse)	XM_417957	0.487584	0.0865861	1.268	1.268	0.890718	1
GgaAffx.26679.1.S1_at	425279	PA2G4	proliferation-associated 2G4, 38kDa	XM_423059	0.0976433	0.0360525	1.26781	1.26781	2.26973	1
GgaAffx.25192.2.S1_s_at	418982	MMP1	matrix metallopeptidase 1 (interstitial collagenase)	XM_417176	0.139023	0.40269	1.26776	1.26776	1.96422	1
GgaAffx.11129.1.S1_at	---	---	---	---	0.00718943	0.00307704	1.26767	1.26767	4.77889	1
Gga.1125.1.S1_at	417972	GBE	eye-globin	NM_001008786	0.00520764	0.617289	1.26707	1.26707	5.12933	1
Gga.8837.1.S1_at	771289	LOC771289	similar to MUC2	XM_001234581	0.0307424	0.00250221	1.26705	1.26705	3.31752	1
GgaAffx.26150.1.S1_at	424030	ASB1	ankyrin repeat and SOCS box-containing 1	XM_421885	0.182267	0.0208559	1.26703	1.26703	1.73309	1
GgaAffx.9484.1.S1_s_at	421738	KPNA5	karyopherin alpha 5 (importin alpha 6)	XM_419770	0.035689	0.0177374	1.26694	1.26694	3.17725	1
Gga.7438.1.S1_at	419341	TSHZ2	teashirt family zinc finger 2	XM_417506	0.0360388	0.0129605	1.26687	1.26687	3.16814	1
Gga.1722.1.S1_at	417635	TMEM49	transmembrane protein 49	XM_415880	0.0316192	0.0417414	1.26658	1.26658	3.29096	1
GgaAffx.11933.1.S1_s_at	417707	NAMPT	nicotinamide phosphoribosyltransferase	NM_001030728	0.049223	0.00756157	1.26657	1.26657	2.88036	1
GgaAffx.3296.1.S1_at	428842	OLFML1	olfactomedin-like 1	XM_426398	0.579879	0.275129	1.26613	1.26613	0.733438	1
GgaAffx.12529.1.S1_s_at	428806	CCT7	chaperonin containing TCP1, subunit 7 (eta)	NM_001031541	0.00730224	0.00367721	1.26598	1.26598	4.76223	1
GgaAffx.9411.1.S1_at	427181	HOMER1	homer homolog 1 (Drosophila)	XM_424768	0.0678512	0.0713714	1.26597	1.26597	2.59082	1
GgaAffx.4651.1.S1_at	420485	LOC420485	hypothetical LOC420485	XM_418587	0.18326	0.163251	1.26592	1.26592	1.72848	1
Gga.19966.1.A1_at	---	---	---	---	0.000801381	0.000128378	1.26582	1.26582	7.38406	1
GgaAffx.8856.1.S1_s_at	426324	LOC426324	similar to MCTP2	XM_430381	0.215741	0.0454612	1.26576	1.26576	1.59003	1
GgaAffx.11530.1.S1_at	416524	EPN2	epsin 2	NM_001012788	0.0651635	0.00882968	1.2656	1.2656	2.62693	1
Gga.7227.1.S1_s_at	416123	IFT122	intraflagellar transport 122 homolog (Chlamydomonas)	XM_414454	0.226165	0.0384976	1.26558	1.26558	1.55006	1
GgaAffx.1883.3.S1_at	427019	ADAMTSL2	ADAMTS-like 2	XM_424621	0.0212773	0.00139547	1.26506	1.26506	3.67077	1
Gga.4514.2.S1_s_at	419081	RRM1	ribonucleotide reductase M1 polypeptide	NM_001030837	0.0121216	0.0142135	1.26496	1.26496	4.23231	1
Gga.7476.1.S1_at	420692	TMEM108	transmembrane protein 108	XM_418792	0.385414	0.0800127	1.26496	1.26496	1.09631	1
Gga.13934.1.S1_at	---	---	---	---	0.523716	0.112651	1.26491	1.26491	0.826659	1
GgaAffx.20568.1.S1_s_at	421689	MAP7	microtubule-associated protein 7	NM_001031072	0.266781	0.630775	1.26486	1.26486	1.41014	1
Gga.3123.1.S1_at	---	---	---	---	0.05604	0.00516778	1.26478	1.26478	2.76257	1
Gga.14663.1.S1_at	---	---	---	---	0.220101	0.0478151	1.26474	1.26474	1.57308	1
Gga.7164.1.S1_at	421110	LOC421110	similar to DNA replication initiator protein	XM_419194	0.283549	0.195035	1.26456	1.26456	1.35845	1
Gga.12928.1.S1_at	424467	VCAM1	vascular cell adhesion molecule 1	XM_422310	0.0691447	0.184879	1.26438	1.26438	2.57398	1
Gga.14968.1.S1_at	---	---	---	---	0.134427	0.260519	1.26433	1.26433	1.99308	1
Gga.19312.1.S1_at	427046	SAFB2	scaffold attachment factor B2	XM_424644	0.143418	0.173295	1.26432	1.26432	1.93755	1
GgaAffx.6074.1.S1_at	417805	SFRS2IP	splicing factor, arginine/serine-rich 2, interacting protein	XM_416047	0.236331	0.12807	1.26426	1.26426	1.51281	1
Gga.4544.1.S1_at	395932	BRG1	BRG1 protein	NM_205059 /// XM_001236707	0.403534	0.0652181	1.26422	1.26422	1.0566	1
GgaAffx.9165.1.A1_x_at	---	---	---	---	0.856529	0.502007	1.26406	1.26406	0.326986	1
GgaAffx.25376.1.S1_at	723973	CAMK4	calcium/calmodulin-dependent protein kinase IV	NM_001034813	0.0775843	0.170191	1.26403	1.26403	2.47173	1
GgaAffx.11288.1.S1_s_at	425626	PEO1	progressive external ophthalmoplegia 1	NM_001031344 /// XM_001236713	0.0526756	0.00649928	1.26388	1.26388	2.81866	1
GgaAffx.1482.2.S1_s_at	417529	RFFL	ring finger and FYVE-like domain containing 1	NM_001030711	0.692942	0.405677	1.26364	1.26364	0.561958	1
Gga.7913.2.S1_s_at	422636	SHROOM3	shroom family member 3	XM_420592	0.105455	0.0395934	1.26364	1.26364	2.20271	1
GgaAffx.2336.1.S1_at	415722	CHD9	chromodomain helicase DNA binding protein 9	XM_414088	0.0268089	0.00533873	1.26358	1.26358	3.44771	1
GgaAffx.20403.1.S1_at	---	---	---	---	0.00620594	0.00817738	1.26334	1.26334	4.93748	1
GgaAffx.2319.1.S1_s_at	417427	HELZ	helicase with zinc finger	XM_415679	0.0707018	0.0228495	1.26331	1.26331	2.55415	1
Gga.781.1.S1_at	396364	CHRM3	cholinergic receptor, muscarinic 3	NM_205399	0.297869	0.393997	1.26314	1.26314	1.31661	1
Gga.4731.2.S1_at	421136	RCJMB04_35e13	Syndecan binding protein (syntenin)	NM_001031024	0.0230762	0.00244727	1.26308	1.26308	3.59194	1
Gga.19780.1.S1_at	---	---	---	---	0.123025	0.0229885	1.26304	1.26304	2.06935	1
GgaAffx.8148.1.S1_at	420900	SERPINB5	serpin peptidase inhibitor, clade B (ovalbumin), member 5	XM_418986	0.000226539	0.0317016	1.26303	1.26303	9.15036	1
GgaAffx.6730.1.S1_at	420576	COL28A1	collagen, type XXVIII, alpha 1	XM_418677	0.0388232	0.0408916	1.26302	1.26302	3.09883	1
GgaAffx.8553.3.S1_at	426087	PBX4	pre-B-cell leukemia homeobox 4	XM_001232359 /// XM_423764	0.312871	0.0503133	1.26293	1.26293	1.27482	1
GgaAffx.22042.1.S1_at	419107	TAF3	TAF3 RNA polymerase II, TATA box binding protein (TBP)-associated factor, 140kDa	NM_001030841	0.0347962	0.00708147	1.26292	1.26292	3.20095	1
Gga.16091.1.S1_at	---	---	---	---	0.00679632	0.00300779	1.26267	1.26267	4.83926	1
GgaAffx.26050.1.S1_s_at	415384	MPHOSPH10	M-phase phosphoprotein 10 (U3 small nucleolar ribonucleoprotein)	XM_413769	0.0137379	0.011964	1.26264	1.26264	4.10503	1
Gga.1266.2.S1_a_at	419648	TXLNA	taxilin alpha	XM_417796	0.0851449	0.00724817	1.2626	1.2626	2.38971	1
GgaAffx.9882.3.S1_at	395291	ROBO2	roundabout, axon guidance receptor, homolog 2 (Drosophila)	XM_416674	0.283814	0.0667017	1.2625	1.2625	1.35765	1
Gga.5428.1.S1_at	---	---	---	---	0.000325916	0.00539732	1.26215	1.26215	8.61955	1
GgaAffx.10623.1.S1_at	418642	ARHGAP6	Rho GTPase activating protein 6	XM_416840	0.0375389	0.0454603	1.26207	1.26207	3.13011	1
Gga.6497.1.S1_at	---	---	---	---	0.38733	0.157686	1.26203	1.26203	1.09203	1
Gga.10873.1.S1_at	---	---	---	---	0.070712	0.0284399	1.262	1.262	2.55402	1
Gga.18158.1.S1_at	---	---	---	---	0.0556741	0.0536144	1.26197	1.26197	2.76849	1
GgaAffx.10053.1.S1_at	421816	ACY1L2	aminoacylase 1-like 2	XM_419840	0.0767633	0.122223	1.26175	1.26175	2.48115	1
Gga.15119.1.S1_at	421052	FAM38B	family with sequence similarity 38, member B	XM_419138	0.0427782	0.0718156	1.26169	1.26169	3.00906	1
GgaAffx.25890.4.S1_s_at	415715	SLC12A4	solute carrier family 12 (potassium/chloride transporters), member 4	XM_001234004	0.162704	0.0843094	1.26156	1.26156	1.82974	1
GgaAffx.11722.1.S1_s_at	417637	RPS6KB1	ribosomal protein S6 kinase, 70kDa, polypeptide 1	NM_001030721	0.0562035	0.0079831	1.26156	1.26156	2.75994	1
GgaAffx.20246.1.S1_s_at	---	---	---	---	0.0341607	0.0195806	1.26154	1.26154	3.21823	1
Gga.16783.1.S1_at	---	---	---	---	0.00274043	0.14497	1.26142	1.26142	5.85862	1
Gga.19455.1.S1_at	417937	LOC417937	Hypothetical LOC417937	XM_416178	0.142686	0.255867	1.2614	1.2614	1.94194	1
Gga.7267.1.S1_at	---	---	---	---	0.208529	0.0366793	1.26128	1.26128	1.61885	1
GgaAffx.9032.4.S1_s_at	422776	ATP8A1	ATPase, aminophospholipid transporter (APLT), class I, type 8A, member 1	XM_420729	0.0317806	0.00306329	1.26127	1.26127	3.28615	1
GgaAffx.1711.1.S1_at	770043	CCBE1	collagen and calcium binding EGF domains 1	XM_001233357	0.209122	0.0607021	1.26124	1.26124	1.61645	1
Gga.9672.1.S1_at	423457	C14orf68	chromosome 14 open reading frame 68	XM_421367	0.0029154	0.00148924	1.26096	1.26096	5.78641	1
GgaAffx.22632.2.S1_at	422364	CUL4B	cullin 4B	XM_420335	0.082966	0.00768583	1.2609	1.2609	2.41253	1
GgaAffx.7514.1.S1_at	422665	SPATA5	spermatogenesis associated 5	XM_420619	0.0870032	0.0562229	1.26078	1.26078	2.37074	1
Gga.2438.1.S1_at	---	---	---	---	0.174362	0.0391959	1.26076	1.26076	1.7708	1
GgaAffx.5249.1.S1_at	424945	CAPN10	calpain 10	XM_422752	0.0694087	0.0231861	1.2607	1.2607	2.57058	1
GgaAffx.5697.2.S1_s_at	420541	STEAP2	six transmembrane epithelial antigen of the prostate 2	XM_418643	0.281846	0.0342948	1.26067	1.26067	1.36356	1
GgaAffx.25344.1.S1_s_at	416386	ABCA3	ATP-binding cassette, sub-family A (ABC1), member 3	XM_414701	0.187978	0.0250461	1.26056	1.26056	1.70688	1
Gga.12418.1.S1_s_at	418605	RPS6KA3	ribosomal protein S6 kinase, 90kDa, polypeptide 3	XM_416804	0.295176	0.0576451	1.26047	1.26047	1.32432	1
GgaAffx.24752.1.S1_at	427336	KIAA0368	KIAA0368	XM_424915	0.024959	0.0246497	1.26046	1.26046	3.51627	1
Gga.12439.1.S1_s_at	424293	UBXD2	UBX domain containing 2	XM_422138	0.0043142	0.0011991	1.26036	1.26036	5.33867	1
Gga.3820.1.S1_s_at	424600	NASP	nuclear autoantigenic sperm protein (histone-binding)	XM_001235059	0.0833132	0.0198235	1.26025	1.26025	2.40885	1
GgaAffx.21687.1.S1_at	---	---	---	---	0.386494	0.0721766	1.26023	1.26023	1.0939	1
Gga.2672.2.S1_s_at	426126	MTHFD2	methylenetetrahydrofolate dehydrogenase (NADP+ dependent) 2, methenyltetrahydrof	NM_001031360	0.129899	0.181541	1.26018	1.26018	2.02252	1
GgaAffx.24772.1.S1_at	421818	C17orf59	chromosome 17 open reading frame 59	XM_419842	0.0670462	0.0718347	1.26017	1.26017	2.60147	1
Gga.17527.1.S1_at	---	---	---	---	0.0493545	0.00705145	1.26016	1.26016	2.87793	1
GgaAffx.11201.3.A1_at	---	---	---	---	0.00520913	0.00284462	1.26013	1.26013	5.12901	1
GgaAffx.11662.1.S1_at	424144	OLA1	Obg-like ATPase 1	NM_001031254	0.00703759	0.0212552	1.26011	1.26011	4.80177	1
GgaAffx.6190.1.S1_at	417832	LEMD3	LEM domain containing 3	XM_416073	0.207583	0.0746357	1.25987	1.25987	1.62271	1
Gga.17997.1.S1_s_at	---	---	---	---	0.00529152	0.00240784	1.25981	1.25981	5.11172	1
Gga.12123.1.S1_at	428508	LOC428508	similar to putative BRCA1-interacting protein	XM_426062	0.0148568	0.00538617	1.25966	1.25966	4.02611	1
Gga.6300.1.S1_at	---	---	---	---	0.0011073	0.00907013	1.2596	1.2596	6.96549	1
Gga.11049.1.S1_at	---	---	---	---	0.0325992	0.0138668	1.25923	1.25923	3.26219	1
Gga.9578.1.S1_s_at	---	---	---	---	0.110359	0.0568221	1.25919	1.25919	2.16327	1
GgaAffx.5406.1.S1_at	424101	GPR1	G protein-coupled receptor 1	XM_421955	0.0048357	0.0156157	1.25906	1.25906	5.21132	1
Gga.6247.1.S1_a_at	---	---	---	---	0.63943	0.238466	1.25895	1.25895	0.64103	1
Gga.4832.1.S1_at	770612	LOC770612	hypothetical protein LOC770612	XM_001233949	0.0154695	0.0393407	1.25889	1.25889	3.98559	1
Gga.8144.1.A1_a_at	422366	FAM70A	family with sequence similarity 70, member A	XM_420338	0.191386	0.109621	1.25883	1.25883	1.69162	1
Gga.6148.1.A1_at	---	---	---	---	0.00638028	0.00523099	1.25876	1.25876	4.90745	1
Gga.5180.1.S1_at	395090	TNFRSF8	tumor necrosis factor receptor superfamily, member 8	NM_204444	0.139557	0.321682	1.25873	1.25873	1.96094	1
Gga.13724.1.S1_at	---	---	---	---	0.0216691	0.0135639	1.25858	1.25858	3.653	1
Gga.10957.1.S1_at	420154	UHRF1	Ubiquitin-like, containing PHD and RING finger domains, 1	XM_418269	0.0814435	0.0711141	1.25851	1.25851	2.42886	1
Gga.13719.1.S1_at	---	---	---	---	0.0269942	0.0137537	1.25826	1.25826	3.44113	1
Gga.717.1.S1_at	396231	RXRG	retinoid X receptor, gamma	NM_205294	0.159522	0.0240925	1.25809	1.25809	1.84658	1
Gga.18415.1.S1_at	770158	ELAVL2	ELAV (embryonic lethal, abnormal vision, Drosophila)-like 2 (Hu antigen B)	XM_001233483	0.498387	0.333878	1.25802	1.25802	0.87118	1
Gga.18718.1.S1_s_at	421254	PACS1	phosphofurin acidic cluster sorting protein 1	XM_419325	0.0137548	0.00320004	1.25798	1.25798	4.10379	1
Gga.4974.1.S2_at	395565	VCAN	versican	NM_204787	0.0350897	0.443604	1.25792	1.25792	3.19309	1
Gga.14412.1.S1_at	422694	LOC422694	Similar to Chromosome 4 open reading frame 32	XM_420647	0.167699	0.0720705	1.25773	1.25773	1.80397	1
Gga.9178.1.S1_at	---	---	---	---	0.140261	0.115346	1.25769	1.25769	1.95662	1
Gga.5591.1.S1_at	---	---	---	---	0.00217601	0.000126023	1.25767	1.25767	6.13141	1
Gga.2986.3.S1_a_at	386582	RB1	retinoblastoma 1 (including osteosarcoma)	NM_204419	0.0148577	0.00437766	1.25761	1.25761	4.02605	1
Gga.1625.1.S1_at	---	---	---	---	0.404757	0.100187	1.25747	1.25747	1.05398	1
GgaAffx.6672.1.S1_at	428899	LOC428899	similar to chromosome 14 open reading frame 145	XM_426454	0.0839854	0.0954235	1.25746	1.25746	2.40178	1
Gga.7230.1.S1_at	770869	LOC770869	similar to ovary-specific acidic protein	XM_001234187	0.36429	0.383312	1.2573	1.2573	1.1448	1
GgaAffx.25560.1.S1_s_at	419703 /// 768557	LOC419703 /// SIK2	hypothetical LOC419703 /// salt-inducible kinase 2	XM_001231563 /// XM_417848	0.0242702	0.0352647	1.25725	1.25725	3.54322	1
GgaAffx.22924.2.S1_s_at	421337	MIA3	melanoma inhibitory activity family, member 3	XM_419399	0.0758309	0.0507961	1.25721	1.25721	2.49197	1
GgaAffx.1883.1.S1_at	427019	ADAMTSL2	ADAMTS-like 2	XM_424621	0.00108835	0.000436731	1.25718	1.25718	6.9875	1
GgaAffx.1695.1.S1_at	---	---	---	---	0.172676	0.0325732	1.25708	1.25708	1.77906	1
Gga.1162.1.S1_at	396404	DDR2	discoidin domain receptor tyrosine kinase 2	XM_422211	0.0223958	0.0424432	1.2569	1.2569	3.62095	1
Gga.17624.1.S1_at	417545	ASL2	argininosuccinate lyase	NM_001030714 /// XM_415792	0.0100633	0.0402619	1.25688	1.25688	4.42414	1
Gga.13311.1.S1_s_at	419738	VPS26B	vacuolar protein sorting 26 homolog B (S. pombe)	XM_417878	0.325192	0.24409	1.25684	1.25684	1.24192	1
Gga.2464.1.S2_at	396489	GLUL	glutamate-ammonia ligase (glutamine synthetase)	NM_205493	0.10046	0.171352	1.25672	1.25672	2.24493	1
GgaAffx.11830.1.S1_s_at	428251	HYOU1	hypoxia up-regulated 1	NM_001006588	0.00578536	0.0245562	1.25669	1.25669	5.01388	1
Gga.16949.1.S1_s_at	420550	ANKIB1	ankyrin repeat and IBR domain containing 1	XM_418652	0.0973776	0.014831	1.25668	1.25668	2.27211	1
Gga.12755.1.S1_s_at	415380	OTUD7A	OTU domain containing 7A	XM_413766	0.0869172	0.0450707	1.25644	1.25644	2.3716	1
GgaAffx.9774.1.S1_at	421125	LOC421125	hypothetical LOC421125	XM_419207	0.368327	0.107387	1.2563	1.2563	1.13534	1
Gga.7194.1.S1_at	418940	SPATA13	spermatogenesis associated 13	XM_417134	0.000888308	0.00298553	1.25629	1.25629	7.24934	1
Gga.17399.1.S1_at	---	---	---	---	0.727304	0.573593	1.25603	1.25603	0.512474	1
GgaAffx.12553.1.S1_at	419434	SAMD11	sterile alpha motif domain containing 11	NM_001030877	0.01856	0.308161	1.25603	1.25603	3.80467	1
GgaAffx.542.1.S1_at	428278	LOC428278	hypothetical LOC428278	XM_425838	0.0682843	0.113611	1.25594	1.25594	2.58514	1
Gga.8069.2.S1_s_at	416285	MGAT4B	mannosyl (alpha-1,3-)-glycoprotein beta-1,4-N-acetylglucosaminyltransferase, iso	XM_414605	0.220159	0.240633	1.25563	1.25563	1.57286	1
Gga.8878.1.S1_at	424747	DGKD	Diacylglycerol kinase, delta 130kDa	XM_422569	0.103502	0.00895921	1.25539	1.25539	2.21897	1
Gga.13004.1.S1_at	---	---	---	---	0.00217063	0.0102749	1.25535	1.25535	6.13437	1
GgaAffx.5930.2.S1_s_at	423929	GRK5	G protein-coupled receptor kinase 5	XM_421789	0.0997633	0.02872	1.25499	1.25499	2.251	1
Gga.8506.1.S2_s_at	378919	TRIB2	tribbles homolog 2 (Drosophila)	NM_204401	0.0339091	0.00452148	1.25494	1.25494	3.22516	1
GgaAffx.834.1.S1_at	417109	RC3H2	ring finger and CCCH-type zinc finger domains 2	XM_415394	0.0402154	0.0026252	1.25493	1.25493	3.06615	1
Gga.10.1.S1_at	395191	OTX2	orthodenticle homeobox 2	NM_204520	0.118799	0.685704	1.25493	1.25493	2.0995	1
GgaAffx.23971.1.S1_at	418075	APPL2	adaptor protein, phosphotyrosine interaction, PH domain and leucine zipper conta	XM_416311	0.127994	0.0346176	1.25477	1.25477	2.03523	1
Gga.4223.1.S1_at	395976	GSTM2	glutathione S-transferase mu 2 (muscle)	NM_205090	0.0718186	0.0128355	1.25469	1.25469	2.54021	1
Gga.7587.1.S1_at	426924	RBM13	RNA binding motif protein 13	XM_424533	0.0381001	0.0188914	1.25442	1.25442	3.1163	1
Gga.739.2.S1_a_at	---	---	---	---	0.434135	0.0746735	1.2544	1.2544	0.993025	1
GgaAffx.8107.1.S1_s_at	419469	UBR4	ubiquitin protein ligase E3 component n-recognin 4	XM_417626	0.0139572	0.00538525	1.25438	1.25438	4.08903	1
Gga.5385.1.S1_s_at	417185	ASS1	argininosuccinate synthetase 1	NM_001013395	0.00804642	0.0675611	1.25422	1.25422	4.6589	1
Gga.17959.1.S1_at	428716	SLC16A2	Solute carrier family 16, member 2 (monocarboxylic acid transporter 8)	XM_426274	0.116314	0.039316	1.25417	1.25417	2.11777	1
Gga.7046.1.S1_s_at	426820	DMBT1	Deleted in malignant brain tumors 1	XM_424430	0.448812	0.229231	1.25408	1.25408	0.963914	1
Gga.12932.1.S1_at	776655	LOC776655	Similar to cardiac calumenin	XM_001236168	0.0813714	0.087074	1.25401	1.25401	2.42964	1
Gga.19195.1.S1_at	---	---	---	---	0.251173	0.0636491	1.25373	1.25373	1.46122	1
NC-002188.CDS43.S1_at	---	---	---	---	0.0401189	0.00704018	1.2535	1.2535	3.06837	1
GgaAffx.24802.1.S1_at	421858	HTR1B	5-hydroxytryptamine (serotonin) receptor 1B	NM_001172781 /// XM_419875	0.0793002	0.0374056	1.2535	1.2535	2.45239	1
Gga.15235.1.S1_at	---	---	---	---	0.0241123	0.00576558	1.25334	1.25334	3.54951	1
Gga.13719.1.A1_at	---	---	---	---	0.673802	0.230726	1.2533	1.2533	0.589904	1
GgaAffx.21698.1.S1_at	396083	SYT1	Synaptotagmin I	NM_205171	0.640847	0.555534	1.25315	1.25315	0.638893	1
GgaAffx.13234.1.S1_at	426038	ABCF2	ATP-binding cassette, sub-family F (GCN20), member 2	NM_001006562	0.036412	0.0116251	1.2531	1.2531	3.15852	1
Gga.10797.1.S1_at	---	---	---	---	0.0613284	0.01362	1.25307	1.25307	2.68131	1
Gga.3310.1.S1_at	395659	XPA	xeroderma pigmentosum, complementation group A	NM_204853	0.00885544	0.00151125	1.25305	1.25305	4.55777	1
Gga.1717.1.S1_at	422992	IFITM5	interferon induced transmembrane protein 5	XM_420924	0.462492	0.164166	1.25296	1.25296	0.937505	1
Gga.15141.1.S1_s_at	415367	HERC1	hect (homologous to the E6-AP (UBE3A) carboxyl terminus) domain and RCC1 (CHC1)-	XM_413753	0.186945	0.0979142	1.25296	1.25296	1.71156	1
Gga.11590.2.S1_x_at	---	---	---	---	0.0263756	0.034196	1.25294	1.25294	3.4633	1
GgaAffx.3602.1.S1_s_at	424490	ABCA4	ATP-binding cassette, sub-family A (ABC1), member 4	XM_422330	0.0547257	0.304795	1.25286	1.25286	2.78404	1
Gga.4176.1.S1_at	396545	EIF5A2	eukaryotic translation initiation factor 5A2	NM_205532	0.00767911	0.00960292	1.25271	1.25271	4.70854	1
Gga.15008.1.S1_at	---	---	---	---	0.17549	0.0328486	1.25262	1.25262	1.76531	1
GgaAffx.24886.1.S1_at	418542	PKNOX1	PBX/knotted 1 homeobox 1	XM_416750	0.0447074	0.0863405	1.25257	1.25257	2.96847	1
Gga.15213.1.S1_at	429020	LOC429020	Similar to ATP synthase lipid-binding protein, mitochondrial precursor (ATP synt	XM_426577	0.453579	0.0779534	1.2525	1.2525	0.954635	1
GgaAffx.23129.1.S1_s_at	423327	GARNL1	GTPase activating Rap/RanGAP domain-like 1	XM_421244	0.0397631	0.00360118	1.25246	1.25246	3.07663	1
Gga.9911.1.S1_at	422732	VPS37A	vacuolar protein sorting 37 homolog A (S. cerevisiae)	XM_420687	0.0616267	0.00818455	1.25232	1.25232	2.67695	1
GgaAffx.25060.1.S1_at	395514	EIF5B	eukaryotic translation initiation factor 5B	NM_001038496	0.000194542	0.00330813	1.25219	1.25219	9.37822	1
GgaAffx.2940.1.S1_at	422129	DGKK	diacylglycerol kinase, kappa	XM_420132	0.033692	0.00939579	1.25204	1.25204	3.23119	1
Gga.146.1.S2_at	395233	DYRK1A	dual-specificity tyrosine-(Y)-phosphorylation regulated kinase 1A	NM_204550	0.0107814	0.00293811	1.25196	1.25196	4.35271	1
GgaAffx.7564.2.S1_s_at	415734	HEATR3	HEAT repeat containing 3	NM_001030569	0.0465018	0.0769608	1.25191	1.25191	2.93236	1
Gga.7785.1.S1_at	417152	ADAMTS13	ADAM metallopeptidase with thrombospondin type 1 motif, 13	XM_415435	0.0107013	0.00247896	1.25185	1.25185	4.36042	1
Gga.10416.1.S1_s_at	423118	CPT1A	carnitine palmitoyltransferase 1A (liver)	NM_001012898	0.23923	0.167635	1.25171	1.25171	1.50249	1
Gga.15974.1.S1_at	---	---	---	---	0.272884	0.0934013	1.25158	1.25158	1.39097	1
Gga.19862.1.S1_at	---	---	---	---	0.322195	0.143943	1.25141	1.25141	1.24981	1
Gga.8734.1.S1_at	416431	USP42	ubiquitin specific peptidase 42	XM_414742	0.00752364	0.0204785	1.25125	1.25125	4.73033	1
Gga.12881.1.S1_s_at	424964	ATP11B	ATPase, class VI, type 11B	XM_422773	0.247084	0.252881	1.25123	1.25123	1.47513	1
Gga.8771.1.S1_at	395107	FGFRL1	fibroblast growth factor receptor-like 1	NM_204456	0.000939194	0.0517407	1.25114	1.25114	7.17702	1
Gga.14393.1.S1_s_at	421692	PDE7B	phosphodiesterase 7B	XM_419729	0.116513	0.105022	1.25111	1.25111	2.1163	1
Gga.14686.1.S1_s_at	422370	NKRF	NF-kappaB repressing factor	NM_001012887	0.0436648	0.00771644	1.25104	1.25104	2.99017	1
Gga.12006.1.S1_at	423042	ADM	adrenomedullin	XM_420975	0.115263	0.284029	1.25101	1.25101	2.12563	1
GgaAffx.7558.2.S1_s_at	420705	ZDHHC3	zinc finger, DHHC-type containing 3	XM_418804	0.272192	0.0434039	1.25084	1.25084	1.39312	1
Gga.9776.1.S1_at	---	---	---	---	0.0273655	0.00363167	1.25083	1.25083	3.42808	1
Gga.19860.1.S1_at	417999	L3MBTL2	L(3)mbt-like 2 (Drosophila)	NM_001006238	0.000471759	2.30917e-05	1.2508	1.2508	8.09868	1
Gga.883.1.S1_at	396542	RFC2	replication factor C (activator 1) 2, 40kDa	NM_205530	0.00820088	0.0289922	1.25068	1.25068	4.63876	1
GgaAffx.24722.1.S1_s_at	421808	MAP3K7	mitogen-activated protein kinase kinase kinase 7	XM_001233490 /// XM_001233503 /// XM_419832	0.278521	0.0660932	1.25067	1.25067	1.37362	1
GgaAffx.26459.1.S1_s_at	423746	USP54	ubiquitin specific peptidase 54	XM_421621	0.0318012	0.0163152	1.25046	1.25046	3.28555	1
Gga.8172.1.S1_s_at	424635	NRD1	nardilysin (N-arginine dibasic convertase)	NM_001031284	0.113835	0.00913317	1.25034	1.25034	2.13641	1
GgaAffx.4574.1.A1_at	427643	SPRY4	sprouty homolog 4 (Drosophila)	NM_001079735 /// XM_425216	0.0720101	0.00875572	1.25008	1.25008	2.53784	1
GgaAffx.21874.3.S1_at	416033	LOC416033	similar to MGC80162 protein	XR_027058	0.0205933	0.00251537	1.25	1.25	3.70265	1
GgaAffx.20866.1.S1_at	---	---	---	---	0.121389	0.156665	1.24983	1.24983	2.08089	1
GgaAffx.3458.1.S1_s_at	429083	DPYD	dihydropyrimidine dehydrogenase	XM_426639	0.226265	0.0567904	1.24979	1.24979	1.54968	1
GgaAffx.22018.1.S1_at	417039	LAO	L-amino-acid oxidase precursor	NM_001099351 /// XM_415327	0.107741	0.122464	1.24979	1.24979	2.1841	1
GgaAffx.9087.2.S1_s_at	426495	ARL2BP	ADP-ribosylation factor-like 2 binding protein	NM_001007970	0.952297	0.52404	1.24955	1.24955	0.167751	1
Gga.3781.1.S1_at	419953	ACE	angiotensin I converting enzyme (peptidyl-dipeptidase A) 1	NM_001167732 /// XM_418074	0.0870518	0.279442	1.24951	1.24951	2.37024	1
GgaAffx.23188.1.A1_s_at	770430	NPM3	nucleophosmin/nucleoplasmin, 3	XM_001233763	0.0823942	0.0360569	1.24933	1.24933	2.41862	1
Gga.17129.1.S1_at	425989	PRMT8	Protein arginine methyltransferase 8	XM_423669	0.278632	0.0403313	1.2493	1.2493	1.37329	1
GgaAffx.12237.1.S1_s_at	422203	OGT	O-linked N-acetylglucosamine (GlcNAc) transferase (UDP-N-acetylglucosamine:polyp	XM_001232518	0.163522	0.184388	1.24928	1.24928	1.82546	1
Gga.19135.1.S1_at	431637	KIAA1958	KIAA1958	XM_429189	0.248862	0.148671	1.24918	1.24918	1.46906	1
GgaAffx.20996.1.S1_at	---	---	---	---	0.0253449	0.132008	1.24906	1.24906	3.50153	1
Gga.16239.1.S1_at	---	---	---	---	7.19819e-05	0.00308562	1.24896	1.24896	10.9522	1
Gga.16546.1.A1_at	421337	MIA3	Melanoma inhibitory activity family, member 3	XM_419399	0.130854	0.0233951	1.24871	1.24871	2.01622	1
GgaAffx.20832.1.S1_s_at	395454	PCSK6	proprotein convertase subtilisin/kexin type 6	XM_413892	0.273957	0.0524415	1.2487	1.2487	1.38764	1
Gga.9894.1.S1_at	---	---	---	---	0.0865846	0.0216869	1.24867	1.24867	2.37497	1
GgaAffx.7866.7.S1_s_at	424301	LRP1B	low density lipoprotein-related protein 1B (deleted in tumors)	XM_422146	0.763631	0.20264	1.24832	1.24832	0.460737	1
Gga.18262.1.S1_at	---	---	---	---	0.0132976	0.00127379	1.24832	1.24832	4.13803	1
Gga.10393.1.S1_at	---	---	---	---	0.692787	0.231039	1.24832	1.24832	0.562183	1
GgaAffx.20469.1.S1_at	---	---	---	---	0.0172357	0.380607	1.24822	1.24822	3.87787	1
Gga.5513.1.S1_a_at	418277	NOL1	nucleolar protein 1, 120kDa	XM_416502	0.0625249	0.0655271	1.24818	1.24818	2.66396	1
GgaAffx.2327.1.S1_at	771550	LOC771550	similar to Ephrin type-A receptor 2 precursor (Tyrosine-protein kinase receptor	XM_001234813	0.144945	0.133336	1.24809	1.24809	1.92848	1
GgaAffx.9807.2.S1_s_at	427297	HOOK3	hook homolog 3 (Drosophila)	XR_027020	0.249601	0.0956601	1.24805	1.24805	1.46654	1
GgaAffx.11361.1.S1_x_at	---	---	---	---	0.0990168	0.0183349	1.24789	1.24789	2.25755	1
Gga.2058.1.S1_at	424043	GLS	glutaminase	NM_001031248	0.150406	0.0170434	1.24777	1.24777	1.89684	1
Gga.9547.1.S1_s_at	422213	SLC7A3	solute carrier family 7 (cationic amino acid transporter, y+ system), member 3	XM_420204	0.00621697	0.0415316	1.24765	1.24765	4.93555	1
GgaAffx.25309.3.S1_x_at	417360	PRPSAP1	phosphoribosyl pyrophosphate synthetase-associated protein 1	XM_415620	0.170974	0.0645853	1.24756	1.24756	1.7875	1
Gga.2826.1.S1_at	---	---	---	---	0.575425	0.413678	1.24755	1.24755	0.740588	1
GgaAffx.1804.1.S1_at	---	---	---	---	0.0697093	0.142492	1.24753	1.24753	2.56673	1
Gga.5225.1.S1_at	---	---	---	---	0.0368132	0.0632566	1.24732	1.24732	3.14829	1
Gga.11059.1.S1_s_at	769021	ECHDC1	enoyl CoA hydratase domain containing 1	XM_001231582	0.0125412	0.00860006	1.24727	1.24727	4.19757	1
Gga.8363.1.S2_at	395152	AXIN2	Axin 2	NM_204491	0.0825393	0.00971112	1.24722	1.24722	2.41707	1
Gga.5803.1.S1_at	426353	UBQLN4	ubiquilin 4	NM_001031373	0.37297	0.06545	1.24711	1.24711	1.12457	1
GgaAffx.2357.1.S1_s_at	415729	NKD1	naked cuticle homolog 1 (Drosophila)	XM_414094	0.0358829	0.00466423	1.24711	1.24711	3.17218	1
Gga.9499.1.S1_s_at	395150	HS6ST2	heparan sulfate 6-O-sulfotransferase 2	NM_204490	0.0852202	0.431271	1.24711	1.24711	2.38893	1
Gga.17675.1.S1_at	---	---	---	---	0.047324	0.0834979	1.2471	1.2471	2.91631	1
Gga.11221.1.S1_at	421904	ERICH1	glutamate-rich 1	XM_419922	0.156635	0.0173663	1.24701	1.24701	1.86217	1
GgaAffx.3880.1.S1_s_at	415846	CBFA2T3	core-binding factor, runt domain, alpha subunit 2; translocated to, 3	NM_001030580	0.0922939	0.00859536	1.24697	1.24697	2.31897	1
GgaAffx.10851.1.S1_s_at	428065	PCDH8	protocadherin 8	NM_001098609 /// XM_001231676 /// XM_425623	0.154304	0.121299	1.24696	1.24696	1.87498	1
GgaAffx.7345.3.S1_s_at	428450	ATP2C1	ATPase, Ca++ transporting, type 2C, member 1	XM_426010	0.152997	0.0703204	1.24682	1.24682	1.88224	1
GgaAffx.22599.2.S1_s_at	422360	STAG2	stromal antigen 2	XM_420331	0.00039343	1.37527e-05	1.24672	1.24672	8.35207	1
Gga.19601.1.S1_at	---	---	---	---	0.0581948	0.0636045	1.24672	1.24672	2.72851	1
Gga.7530.1.S1_at	---	---	---	---	0.609393	0.236785	1.2467	1.2467	0.686942	1
Gga.115.1.S1_at	378910	RECQL	RecQ protein-like (DNA helicase Q1-like)	NM_204393	0.23154	0.169078	1.24666	1.24666	1.53016	1
GgaAffx.11364.1.S1_at	420354	MTBP	Mdm2, transformed 3T3 cell double minute 2, p53 binding protein (mouse) binding	XM_418460	0.0974806	0.0604359	1.24665	1.24665	2.27119	1
GgaAffx.11211.1.S1_at	429516	LOC429516	similar to Protein KIAA1333 homolog	XM_427073	0.140155	0.0270844	1.24655	1.24655	1.95727	1
GgaAffx.25755.1.S1_s_at	416815	NCOR2	nuclear receptor co-repressor 2	XM_415107	0.557364	0.241757	1.24651	1.24651	0.769989	1
GgaAffx.10215.1.S1_at	---	---	---	---	0.0955462	0.223688	1.24642	1.24642	2.28869	1
Gga.16729.1.S1_at	420830	TPMT	Thiopurine S-methyltransferase	XM_418921	0.0504783	0.0126974	1.24627	1.24627	2.85741	1
Gga.2364.1.S1_at	423793	LOC423793	similar to M-phase phosphoprotein 1	XR_027103	0.615539	0.236302	1.24623	1.24623	0.67744	1
Gga.17121.1.S1_s_at	426746	OTUD3	OTU domain containing 3	XM_424363	0.0895259	0.0751695	1.24616	1.24616	2.34565	1
GgaAffx.2835.1.S1_at	424439	RC3H1	ring finger and CCCH-type zinc finger domains 1	XM_001234604	0.134226	0.0227018	1.24597	1.24597	1.99436	1
NC-000899.CDS27.S1_x_at	---	---	---	---	0.00874703	0.00804195	1.24591	1.24591	4.57072	1
GgaAffx.7572.1.S1_at	423525	PPM1A	protein phosphatase 1A (formerly 2C), magnesium-dependent, alpha isoform	XM_421422	0.0382586	0.00696762	1.24585	1.24585	3.11244	1
GgaAffx.23620.1.S1_s_at	429042	CLASP1	cytoplasmic linker associated protein 1	XM_426599	0.281034	0.0321364	1.24584	1.24584	1.366	1
Gga.16179.1.A1_at	---	---	---	---	0.134659	0.0258909	1.2458	1.2458	1.99159	1
Gga.11350.2.S1_at	418623	ACE2	Angiotensin I converting enzyme (peptidyl-dipeptidase A) 2	XM_416822	0.0221181	0.076635	1.24578	1.24578	3.63306	1
Gga.7493.1.S1_at	---	---	---	---	0.135276	0.652065	1.24574	1.24574	1.98767	1
GgaAffx.9643.1.S1_at	395456	PCSK5	proprotein convertase subtilisin/kexin type 5	XM_424841	0.31488	0.0824817	1.24573	1.24573	1.26937	1
Gga.19521.1.S1_s_at	418769	ITGBL1	integrin, beta-like 1 (with EGF-like repeat domains)	XM_416966	0.56863	0.411692	1.24553	1.24553	0.751574	1
Gga.18480.1.S1_at	---	---	---	---	0.213419	0.0334585	1.24543	1.24543	1.59921	1
GgaAffx.25553.1.S1_s_at	423633	BMS1	BMS1 homolog, ribosome assembly protein (yeast)	XM_421517	0.131727	0.0526453	1.2453	1.2453	2.01051	1
GgaAffx.4460.2.S1_s_at	420468	PARD3	par-3 partitioning defective 3 homolog (C. elegans)	NM_001039280	0.00162498	0.00947203	1.24517	1.24517	6.48538	1
Gga.19301.1.S1_at	---	---	---	---	0.05808	0.0349944	1.24497	1.24497	2.73029	1
Gga.1748.2.A1_at	418410	KIAA1524	KIAA1524	NM_001030785	0.000857151	0.00134696	1.24494	1.24494	7.2959	1
Gga.11741.4.S1_a_at	423989	TFPI	Tissue factor pathway inhibitor (lipoprotein-associated coagulation inhibitor)	XM_001232100 /// XM_421849	0.593397	0.286242	1.24492	1.24492	0.711955	1
GgaAffx.20212.1.S1_s_at	426746	OTUD3	OTU domain containing 3	XM_424363	0.0938966	0.0572484	1.24484	1.24484	2.30391	1
GgaAffx.1063.1.S1_at	---	---	---	---	0.0639996	0.0078308	1.24467	1.24467	2.64306	1
Gga.801.1.S2_at	396398 /// 776018	IFNA3 /// LOC776018	interferon /// similar to interferon	NM_205427 /// XM_001235586	0.107091	0.014586	1.24448	1.24448	2.18934	1
GgaAffx.5884.3.S1_s_at	423250	RBM25	RNA binding motif protein 25	XM_421170	0.024098	0.00957053	1.24432	1.24432	3.55008	1
Gga.9367.1.S1_at	418823	TDRD3	tudor domain containing 3	NM_001030822	0.26577	0.0888278	1.24428	1.24428	1.41336	1
Gga.14782.1.S1_at	---	---	---	---	0.256792	0.0574551	1.24426	1.24426	1.44248	1
Gga.2668.2.S1_at	396266	RARB	retinoic acid receptor, beta	NM_205326	0.000292667	0.000113398	1.24414	1.24414	8.77464	1
Gga.1148.1.S1_at	396169	ST6GAL1	ST6 beta-galactosamide alpha-2,6-sialyltranferase 1	NM_205241	0.241027	0.241288	1.24409	1.24409	1.49615	1
GgaAffx.26407.3.S1_s_at	424804	CUL3	cullin 3	XM_422620	0.0172263	0.00163301	1.24401	1.24401	3.8784	1
Gga.17737.1.S1_at	---	---	---	---	0.868804	0.463491	1.24401	1.24401	0.308595	1
Gga.11472.1.S1_s_at	417415	TEX2	testis expressed 2	XM_415667	0.135074	0.191903	1.24395	1.24395	1.98896	1
Gga.14891.1.S1_s_at	416569	RBBP6	retinoblastoma binding protein 6	XM_414870	0.059756	0.0397273	1.24383	1.24383	2.70466	1
Gga.18485.1.S1_s_at	419406	CDC2L1	cell division cycle 2-like 1 (PITSLRE proteins)	NM_001030871	0.0172812	0.0710951	1.24378	1.24378	3.87525	1
Gga.3250.1.S1_at	396189	VSNL1	visinin-like 1	NM_205255	0.349888	0.405798	1.24374	1.24374	1.17938	1
GgaAffx.4468.2.S1_s_at	416068	ACOX2	acyl-Coenzyme A oxidase 2, branched chain	XM_414406	6.02295e-05	0.0103327	1.24365	1.24365	11.251	1
Gga.19709.1.S1_s_at	374052	F5	coagulation factor V (proaccelerin, labile factor)	XM_001231900	0.19417	0.0812185	1.24362	1.24362	1.67936	1
Gga.6962.1.S1_at	421511	GPR137B	G protein-coupled receptor 137B	NM_001031062	0.229034	0.139139	1.24361	1.24361	1.53938	1
GgaAffx.10521.1.S1_at	428651	GRHL1	grainyhead-like 1 (Drosophila)	XM_426209	0.00527965	0.025224	1.24359	1.24359	5.1142	1
Gga.4637.1.S1_s_at	419666	YARS	tyrosyl-tRNA synthetase	NM_001006314	0.025218	0.0349067	1.24358	1.24358	3.50635	1
Gga.15797.1.S1_at	---	---	---	---	0.380339	0.102666	1.24338	1.24338	1.10773	1
GgaAffx.8122.1.S1_at	420881	C6orf85	chromosome 6 open reading frame 85	XM_418968	0.140741	0.121891	1.24337	1.24337	1.95369	1
GgaAffx.26217.1.S1_at	423004	FAM82C	family with sequence similarity 82, member C	XM_420936	0.0961465	0.0385294	1.2433	1.2433	2.28322	1
Gga.1665.2.S1_a_at	419713	SRPR	signal recognition particle receptor ('docking protein')	NM_001039277	0.0611517	0.0230647	1.24327	1.24327	2.6839	1
Gga.12929.1.S1_at	416520	SHMT1	serine hydroxymethyltransferase 1 (soluble)	XM_414824	0.00184196	0.00168582	1.24314	1.24314	6.33225	1
GgaAffx.697.1.S1_s_at	427527	CCDC135	coiled-coil domain containing 135	XM_425101	0.0251606	0.04874	1.24306	1.24306	3.50854	1
Gga.15747.2.S1_s_at	418910	PDS5B	PDS5, regulator of cohesion maintenance, homolog B (S. cerevisiae)	NM_001012827	0.0064974	0.00330207	1.24306	1.24306	4.88777	1
Gga.436.1.S1_at	395739	BRN-3A	POU domain factor	---	0.0986962	0.0258919	1.24245	1.24245	2.26037	1
Gga.13856.1.S1_at	427277	RGMB	RGM domain family, member B	XM_424860	0.00262979	0.0158771	1.24234	1.24234	5.90693	1
GgaAffx.8293.2.S1_s_at	420938	NSUN2	NOL1/NOP2/Sun domain family, member 2	NM_001031004	0.298798	0.107357	1.2422	1.2422	1.31396	1
Gga.3359.1.S1_at	---	---	---	---	0.0369427	0.0163846	1.2422	1.2422	3.14502	1
Gga.14072.1.S1_s_at	418184	AEBP2	AE binding protein 2	XM_416415	0.253492	0.165727	1.24218	1.24218	1.45344	1
GgaAffx.23927.6.S1_at	419126	RBL1	retinoblastoma-like 1 (p107)	XM_417312	0.204171	0.0425888	1.24212	1.24212	1.63676	1
GgaAffx.24414.1.S1_at	416375 /// 425481	LOC416375 /// LOC425481	type XXIII collagen alpha 1 chain /// type XXIII collagen alpha 1 chain	XM_414689 /// XM_423235	0.255541	0.0522398	1.24208	1.24208	1.44662	1
GgaAffx.7407.1.S1_s_at	424238	TFCP2L1	transcription factor CP2-like 1	XM_422087	0.246373	0.100756	1.24203	1.24203	1.47757	1
Gga.12256.1.S1_at	771073	LOC771073	Hypothetical protein LOC771073	XM_001234374	0.300583	0.195105	1.24192	1.24192	1.3089	1
GgaAffx.23219.1.S1_s_at	422515	FAM13A1	family with sequence similarity 13, member A1	XM_420478	0.145885	0.0981481	1.24188	1.24188	1.92295	1
Gga.12682.1.S1_s_at	423007	CASC5	cancer susceptibility candidate 5	XM_420938	0.00654893	0.008657	1.24184	1.24184	4.87924	1
GgaAffx.12721.1.S1_at	428166	PMEPA1	prostate transmembrane protein, androgen induced 1	NM_001031492	0.0703436	0.0182185	1.24181	1.24181	2.55867	1
Gga.11885.1.S1_at	---	---	---	---	0.0284874	0.0106208	1.24176	1.24176	3.38979	1
Gga.8753.1.S1_at	---	---	---	---	0.102839	0.0362506	1.24173	1.24173	2.22456	1
Gga.18910.1.S1_at	396368	GNAI1	guanine nucleotide binding protein (G protein), alpha inhibiting activity polype	NM_205403	0.0306531	0.207141	1.24164	1.24164	3.32027	1
Gga.13505.1.S1_at	419002	SNORA32	small nucleolar RNA, H/ACA box 32	XM_417196	0.838943	0.606805	1.24145	1.24145	0.35288	1
GgaAffx.20203.1.S1_at	---	---	---	---	0.0988878	0.0455094	1.24134	1.24134	2.25868	1
Gga.14504.1.S1_at	431603	ADAMTSL1	ADAMTS-like 1	XM_429157	0.0729724	0.265045	1.2413	1.2413	2.52605	1
GgaAffx.21209.1.S1_at	---	---	---	---	0.0389215	0.00923819	1.24129	1.24129	3.09647	1
GgaAffx.25962.2.S1_s_at	415724	TOX3	TOX high mobility group box family member 3	XM_414090	0.0666515	0.0541853	1.24119	1.24119	2.60675	1
Gga.11883.1.S1_a_at	421142	ASPH	Aspartate beta-hydroxylase	XM_419224	0.111071	0.0677609	1.24106	1.24106	2.15769	1
Gga.19410.1.S1_at	772356	LOC772356	hypothetical protein LOC772356	XM_001235504	0.312704	0.279552	1.24103	1.24103	1.27527	1
Gga.19246.1.S1_s_at	---	---	---	---	0.119061	0.0121044	1.24101	1.24101	2.0976	1
Gga.19309.1.S1_at	---	---	---	---	0.481381	0.125615	1.24093	1.24093	0.902095	1
Gga.7238.1.S1_s_at	426429	OGDH	oxoglutarate (alpha-ketoglutarate) dehydrogenase (lipoamide)	NM_001031382	0.188083	0.0371119	1.24087	1.24087	1.70641	1
Gga.3820.3.S1_s_at	424600	NASP	nuclear autoantigenic sperm protein (histone-binding)	XM_001235059	0.297881	0.233458	1.24084	1.24084	1.31658	1
Gga.19247.1.S1_at	---	---	---	---	0.144779	0.0251356	1.24082	1.24082	1.92946	1
GgaAffx.8253.1.S1_at	395891	CACNA1C	calcium channel, voltage-dependent, L type, alpha 1C subunit	XM_416388	0.0801274	0.0407341	1.24065	1.24065	2.44323	1
GgaAffx.10181.1.S1_at	421871	FAM135A	family with sequence similarity 135, member A	XM_419888	0.301561	0.0811706	1.24063	1.24063	1.30614	1
GgaAffx.5930.1.S1_at	423929	GRK5	G protein-coupled receptor kinase 5	XM_421789	0.00764559	0.0598433	1.24063	1.24063	4.71319	1
Gga.18561.1.S1_s_at	421415	LOC421415	hypothetical gene supported by CR390940	XM_429850	0.383775	0.0612448	1.23997	1.23997	1.09998	1
Gga.694.1.S1_at	396177	EPHB1	EPH receptor B1	XM_422685	0.0665511	0.145468	1.23996	1.23996	2.60809	1
Gga.5686.1.S1_at	---	---	---	---	0.0342046	0.0422672	1.23982	1.23982	3.21702	1
Gga.5807.1.S1_at	---	---	---	---	0.113659	0.0707343	1.23968	1.23968	2.13774	1
GgaAffx.7257.1.S1_s_at	420661	RBMS3	RNA binding motif, single stranded interacting protein	XM_418760	0.151043	0.0164762	1.23963	1.23963	1.89323	1
GgaAffx.8374.1.S1_s_at	418190	SLCO1A2	solute carrier organic anion transporter family, member 1A2	XM_416421	0.118677	0.483214	1.23957	1.23957	2.10039	1
Gga.16043.1.S1_s_at	416721	CSRP2BP	CSRP2 binding protein	XM_415019	0.232038	0.0264109	1.23946	1.23946	1.52834	1
Gga.2448.1.S2_at	396061	FASN	fatty acid synthase	NM_205155	0.287609	0.0517957	1.23943	1.23943	1.34638	1
Gga.13036.1.S1_at	422719	SORBS2	Sorbin and SH3 domain containing 2	XM_420674	0.247517	0.109369	1.23943	1.23943	1.47364	1
GgaAffx.8349.1.S1_at	420956	C18orf37	chromosome 18 open reading frame 37	XM_419041	0.0152626	0.0537393	1.23936	1.23936	3.99908	1
GgaAffx.25609.1.S1_at	424000	NCKAP1	NCK-associated protein 1	XM_001232274 /// XM_001232334 /// XM_421856	0.0246605	0.00450806	1.23926	1.23926	3.52785	1
Gga.5669.1.S1_at	395088	ZMYND19	zinc finger, MYND-type containing 19	NM_204443	0.0212323	0.0242518	1.23914	1.23914	3.67283	1
Gga.11034.1.S1_at	395292	ROBO1	roundabout, axon guidance receptor, homolog 1 (Drosophila)	XM_416673	0.0157092	0.118748	1.23911	1.23911	3.97021	1
GgaAffx.921.1.A1_at	771943	C1orf74	chromosome 1 open reading frame 74	XM_001235152	0.17296	0.0298449	1.23908	1.23908	1.77767	1
Gga.5272.1.S1_at	---	---	---	---	0.000106408	0.0427443	1.23905	1.23905	10.3151	1
Gga.6770.2.S1_s_at	395494	BMP7	bone morphogenetic protein 7	XM_417496	0.649653	0.351433	1.239	1.239	0.625681	1
GgaAffx.13129.1.S1_at	431669	RMI1	RMI1, RecQ mediated genome instability 1, homolog (S. cerevisiae)	NM_001031612	0.241535	0.08132	1.23873	1.23873	1.49437	1
GgaAffx.25295.1.S1_at	430886	LOC430886	similar to beige protein homolog	XM_428436	0.34829	0.307015	1.23855	1.23855	1.1833	1
GgaAffx.12104.1.S1_at	426362	DNAJB14	DnaJ (Hsp40) homolog, subfamily B, member 14	NM_001031375	0.0128185	0.0106197	1.23855	1.23855	4.1753	1
GgaAffx.5438.1.S1_at	420516	LOC420516	similar to mannose receptor	XM_418618	0.447508	0.205393	1.2385	1.2385	0.966468	1
Gga.15759.1.S1_at	418059	HMG2L1	High-mobility group protein 2-like 1	XM_416295	0.0930722	0.00858645	1.23834	1.23834	2.31162	1
GgaAffx.26046.1.S1_at	424415	XPR1	xenotropic and polytropic retrovirus receptor	XM_422258	0.113684	0.0362956	1.23829	1.23829	2.13755	1
Gga.8384.1.S1_at	416057	QRICH1	glutamine-rich 1	NM_001012782 /// XM_001233526	0.194094	0.0381087	1.23826	1.23826	1.6797	1
Gga.9147.1.S1_at	424588	LOC424588	hypothetical LOC424588	XM_422428	0.0773197	0.0317255	1.23823	1.23823	2.47476	1
Gga.13011.1.S1_at	---	---	---	---	0.0193602	0.0240336	1.23822	1.23822	3.76314	1
Gga.18596.1.S1_at	427313	CCDC125	coiled-coil domain containing 125	XM_424893	0.0537019	0.0155513	1.23812	1.23812	2.80115	1
GgaAffx.12570.1.S1_s_at	422093	PCYT2	phosphate cytidylyltransferase 2, ethanolamine	NM_001031106	0.240425	0.0669135	1.23811	1.23811	1.49827	1
Gga.1935.1.S1_at	423122	FADS2	Fatty acid desaturase 2	NM_001160428 /// XM_421053	0.000583332	0.203477	1.23787	1.23787	7.80799	1
Gga.12552.1.S1_at	---	---	---	---	0.0326629	0.166043	1.23781	1.23781	3.26035	1
Gga.9212.1.S1_s_at	422880	NOL14	nucleolar protein 14	XM_420824	0.0174298	0.0358889	1.2377	1.2377	3.86676	1
Gga.3461.1.S1_at	396102	LRP8	low density lipoprotein receptor-related protein 8, apolipoprotein e receptor	NM_205186	0.103155	0.103714	1.23768	1.23768	2.22189	1
Gga.2018.1.S1_a_at	---	---	---	---	0.526555	0.116353	1.23766	1.23766	0.821773	1
Gga.3175.1.S1_at	427171	PIK3R1	Phosphoinositide-3-kinase, regulatory subunit 1 (p85 alpha)	XM_001232235 /// XM_424759	0.00421057	0.00705012	1.23744	1.23744	5.36598	1
Gga.2456.1.S1_at	---	---	---	---	0.0173695	0.00735034	1.23743	1.23743	3.8702	1
GgaAffx.11648.1.S1_at	424912	BCL6	B-cell CLL/lymphoma 6 (zinc finger protein 51)	NM_001012930	0.0572497	0.160521	1.23736	1.23736	2.74328	1
Gga.3068.2.S1_at	419623	THRAP3	thyroid hormone receptor associated protein 3	NM_001030899	0.0553735	0.231877	1.23734	1.23734	2.77339	1
GgaAffx.22699.1.S1_at	424964	ATP11B	ATPase, class VI, type 11B	XM_422773	0.188557	0.0215528	1.2373	1.2373	1.70427	1
Gga.12192.2.S1_s_at	427446	OSMR	oncostatin M receptor	XM_425020	0.118634	0.109155	1.23725	1.23725	2.10071	1
GgaAffx.26462.1.A1_s_at	769393	GPR88	G protein-coupled receptor 88	XM_001232658	0.1657	0.181564	1.23722	1.23722	1.81418	1
Gga.19935.1.S1_s_at	422687	ARSJ	arylsulfatase family, member J	XM_420639	0.0107962	0.0205909	1.23711	1.23711	4.3513	1
GgaAffx.20198.1.S1_s_at	771253	TMEM38A	transmembrane protein 38A	NM_001079758 /// XM_001234544	0.0440334	0.011282	1.23702	1.23702	2.98243	1
Gga.16386.1.S1_at	---	---	---	---	0.198417	0.0336702	1.23698	1.23698	1.66101	1
Gga.5465.1.S1_at	418510	RCAN1	regulator of calcineurin 1	XM_416719	0.639215	0.169995	1.23687	1.23687	0.641352	1
GgaAffx.25344.4.S1_s_at	416386	ABCA3	ATP-binding cassette, sub-family A (ABC1), member 3	XM_414701	0.324979	0.0598607	1.23684	1.23684	1.24247	1
Gga.15322.1.S1_s_at	426737	MAPT	microtubule-associated protein tau	XM_424354	0.758634	0.326995	1.23683	1.23683	0.467838	1
Gga.10044.1.S1_s_at	---	---	---	---	0.058869	0.0561197	1.23677	1.23677	2.71813	1
Gga.16275.2.S1_s_at	415694	BBS2	Bardet-Biedl syndrome 2	NM_001012777	0.0602228	0.016673	1.23672	1.23672	2.69766	1
Gga.14612.1.S1_at	---	---	---	---	0.299588	0.0442446	1.23662	1.23662	1.31172	1
Gga.19182.1.S1_at	425345	PYROXD2	chromosome 10 open reading frame 33	XM_423118	0.19138	0.0403039	1.23654	1.23654	1.69165	1
GgaAffx.8993.2.S1_s_at	415759	C19orf2	chromosome 19 open reading frame 2	XM_414123	0.0137781	0.010255	1.23639	1.23639	4.10208	1
Gga.14704.1.S1_at	---	---	---	---	0.0439253	0.0700285	1.23627	1.23627	2.98469	1
GgaAffx.1661.1.S1_at	427394 /// 769948	LOC427394 /// LOC769948	similar to transcription factor-like nuclear regulator /// similar to transcript	XM_001233264 /// XM_424966	0.117509	0.0872245	1.23626	1.23626	2.10894	1
Gga.15162.1.S1_at	420951	VSTM2A	V-set and transmembrane domain containing 2A	XM_419036	0.731959	0.56736	1.23606	1.23606	0.505821	1
GgaAffx.5942.1.S1_at	769935	FOXP2	forkhead box P2	XM_001232291 /// XM_001232321 /// XM_001232343 /// XM_001232372 /// XM_001232395	0.152241	0.0167962	1.23605	1.23605	1.88647	1
Gga.2770.1.S1_at	421044	LOC421044	similar to Protein C18orf1	NM_001031013	0.0754203	0.0232408	1.23601	1.23601	2.49678	1
Gga.4571.1.S1_s_at	---	---	---	---	0.109653	0.0265534	1.236	1.236	2.16883	1
GgaAffx.25213.2.S1_s_at	419020	RAB30	RAB30, member RAS oncogene family	XM_417213	0.116434	0.404112	1.23555	1.23555	2.11688	1
Gga.7500.1.S1_at	---	---	---	---	0.154779	0.168303	1.23555	1.23555	1.87235	1
GgaAffx.5352.3.S1_s_at	423207	VPS18	vacuolar protein sorting 18 homolog (S. cerevisiae)	XM_421131	0.820525	0.289193	1.23543	1.23543	0.379581	1
GgaAffx.2561.1.A1_at	428691	CYSLTR1	cysteinyl leukotriene receptor 1	XM_426249	0.0847349	0.0121328	1.23541	1.23541	2.39396	1
Gga.14368.1.S1_at	770226	GNAZ	Guanine nucleotide binding protein (G protein), alpha z polypeptide	XM_001232444	0.133311	0.325545	1.23532	1.23532	2.00024	1
GgaAffx.9535.1.S1_s_at	769464	FCHO2	FCH domain only 2	XM_001232743	0.0545409	0.0105642	1.23525	1.23525	2.78711	1
GgaAffx.4115.1.S1_s_at	422254	ATP11C	ATPase, class VI, type 11C	XM_420240	0.364869	0.137629	1.23519	1.23519	1.14344	1
Gga.1335.2.S1_a_at	395809	SLC4A2	solute carrier family 4, anion exchanger, member 2 (erythrocyte membrane protein	NM_204963 /// XM_001231601	0.309313	0.0567355	1.23507	1.23507	1.28455	1
Gga.482.1.S1_at	395815	PTPN11	protein tyrosine phosphatase, non-receptor type 11	NM_204968	0.185011	0.0809506	1.23505	1.23505	1.7204	1
Gga.6781.1.S1_at	---	---	---	---	0.161823	0.0724311	1.23502	1.23502	1.83437	1
GgaAffx.115.1.S1_at	425428 /// 769494	LOC769494 /// ZMAT3	similar to zinc finger protein WIG1 /// zinc finger, matrin type 3	XM_001232781 /// XM_423190	0.163697	0.124536	1.23491	1.23491	1.82455	1
GgaAffx.12668.1.S1_s_at	423661	ARID5B	AT rich interactive domain 5B (MRF1-like)	NM_001031220	0.0420495	0.0796482	1.23488	1.23488	3.02491	1
Gga.9469.1.S1_at	---	---	---	---	0.0935065	0.114009	1.23468	1.23468	2.30755	1
Gga.10538.1.S1_s_at	---	---	---	---	0.134473	0.0850551	1.23468	1.23468	1.99278	1
Gga.2377.2.S1_at	---	---	---	---	0.106096	0.109052	1.23463	1.23463	2.19746	1
GgaAffx.2785.1.S1_at	417454	CCDC137	coiled-coil domain containing 137	XM_415702	0.0811922	0.0949765	1.23462	1.23462	2.43158	1
GgaAffx.8789.1.S1_at	421677	HECA	headcase homolog (Drosophila)	XM_419714	0.0583912	0.0329692	1.23447	1.23447	2.72547	1
Gga.4120.1.S1_at	374192	DUSP1	dual specificity phosphatase 1	NM_001085359 /// XM_422941	0.153429	0.0740803	1.23431	1.23431	1.87983	1
GgaAffx.9818.2.S1_s_at	421785	PREP	prolyl endopeptidase	NM_001006410	0.0967308	0.0359474	1.2341	1.2341	2.27793	1
Gga.5857.1.S1_s_at	770664	ARMET	Arginine-rich, mutated in early stage tumors	XR_026738	0.00867079	0.0527838	1.23398	1.23398	4.57994	1
GgaAffx.619.1.A1_at	---	---	---	---	0.0385522	0.00453104	1.23389	1.23389	3.10533	1
Gga.12769.1.S1_s_at	417986	NHP2L1	NHP2 non-histone chromosome protein 2-like 1 (S. cerevisiae)	XM_416225	0.712834	0.225323	1.23387	1.23387	0.533222	1
Gga.12297.1.S1_s_at	421031	MPPE1	Metallophosphoesterase 1	NM_001039283	0.0732106	0.040382	1.23378	1.23378	2.52315	1
GgaAffx.22781.1.S1_at	424125	SESTD1	SEC14 and spectrin domains 1	XM_421978	0.0955277	0.0129529	1.23374	1.23374	2.28886	1
GgaAffx.11562.1.S1_s_at	424640	ORC1L	origin recognition complex, subunit 1-like (yeast)	NM_001031286	0.213799	0.170004	1.23372	1.23372	1.59769	1
GgaAffx.24476.1.S1_at	425066	MSTO1	misato homolog 1 (Drosophila)	XM_422860	0.00874003	0.0276623	1.23369	1.23369	4.57156	1
Gga.5242.2.S1_a_at	422588	HSD17B11	hydroxysteroid (17-beta) dehydrogenase 11	XM_420547	0.525108	0.11698	1.23369	1.23369	0.824261	1
Gga.5162.1.S1_at	374052	F5	coagulation factor V (proaccelerin, labile factor)	XM_001231900	0.09616	0.452065	1.23352	1.23352	2.28309	1
GgaAffx.10548.1.A1_at	---	---	---	---	0.0182275	0.00372216	1.2335	1.2335	3.8225	1
Gga.7021.1.S1_at	---	---	---	---	0.577988	0.156931	1.23337	1.23337	0.736469	1
Gga.2363.1.S1_at	418275	NCAPD2	non-SMC condensin I complex, subunit D2	NM_001080862 /// XR_027181	0.0921841	0.0156923	1.23334	1.23334	2.32001	1
GgaAffx.5390.2.S1_s_at	423889	SMNDC1	survival motor neuron domain containing 1	XM_421753	0.148665	0.0260818	1.23328	1.23328	1.9068	1
Gga.4833.1.S1_at	420478	PAPD1	PAP associated domain containing 1	XM_418580	0.0116443	0.00393684	1.23324	1.23324	4.27345	1
GgaAffx.8347.2.S1_s_at	418183	PLEKHA5	pleckstrin homology domain containing, family A member 5	XM_416414	0.0593429	0.0191606	1.2331	1.2331	2.71091	1
Gga.15907.1.S1_at	---	---	---	---	0.0113217	0.148711	1.23309	1.23309	4.30231	1
GgaAffx.2951.1.A1_x_at	---	---	---	---	0.0147473	0.00238526	1.23308	1.23308	4.03355	1
GgaAffx.22824.1.S1_at	424130	OSBPL6	oxysterol binding protein-like 6	XM_001233035 /// XM_421982	0.27099	0.0421163	1.23305	1.23305	1.39687	1
Gga.8487.2.S1_at	422626	SRP72	signal recognition particle 72kDa	NM_001006449	0.352777	0.0508778	1.23302	1.23302	1.17234	1
Gga.16200.1.S1_at	---	---	---	---	0.0093596	0.102158	1.23302	1.23302	4.49971	1
Gga.1567.2.S1_at	---	---	---	---	0.0502019	0.137031	1.23295	1.23295	2.86241	1
Gga.20055.1.S1_at	---	---	---	---	0.00282476	0.0595478	1.23284	1.23284	5.82321	1
GgaAffx.13095.1.S1_at	420535	RUNDC3B	RUN domain containing 3B	NM_001030972	0.000930085	0.0514767	1.23282	1.23282	7.18964	1
Gga.13591.1.S1_s_at	425058	SARNP	SAP domain containing ribonucleoprotein	NM_001031324	0.00100422	0.0835773	1.23276	1.23276	7.09062	1
Gga.9193.1.S1_s_at	424390	ITPA	inosine triphosphatase (nucleoside triphosphate pyrophosphatase)	XM_422234	0.215473	0.128324	1.23273	1.23273	1.59109	1
Gga.14084.1.A1_at	---	---	---	---	0.231615	0.0256913	1.23272	1.23272	1.52989	1
GgaAffx.8518.1.S1_at	429640	LMBRD2	LMBR1 domain containing 2	NM_001031579	0.00440836	0.000375311	1.23266	1.23266	5.31447	1
Gga.3968.1.A1_at	---	---	---	---	0.25796	0.0892853	1.23265	1.23265	1.43864	1
GgaAffx.9949.1.S1_at	428799	ADRA2C	adrenergic, alpha-2C-, receptor	XM_426355	0.237314	0.162133	1.2326	1.2326	1.5093	1
GgaAffx.20548.1.S1_at	---	---	---	---	0.0453649	0.011254	1.23242	1.23242	2.95506	1
Gga.7012.1.S1_at	---	---	---	---	0.428703	0.101795	1.23234	1.23234	1.00402	1
Gga.12556.2.S1_a_at	419364	ERRFI1	ERBB receptor feedback inhibitor 1	XM_417525	0.0478565	0.0203729	1.23228	1.23228	2.90608	1
Gga.13543.1.S1_at	423323	LOC423323	similar to RIKEN cDNA 1700047I17	NM_001031202	0.00836829	0.000481996	1.23215	1.23215	4.61739	1
Gga.16221.1.S1_s_at	---	---	---	---	0.0860184	0.0183684	1.23206	1.23206	2.38074	1
Gga.10226.1.S1_s_at	418990	ARHGAP42	Rho GTPase activating protein 42	XM_417185	0.00707798	0.0137334	1.23203	1.23203	4.79563	1
Gga.18798.1.A1_at	---	---	---	---	0.0592892	0.00616306	1.232	1.232	2.71172	1
Gga.12329.1.S1_at	---	---	---	---	0.0840653	0.108472	1.2319	1.2319	2.40094	1
Gga.9848.2.S1_at	420143	SLC35E1	solute carrier family 35, member E1	XM_418259	0.0268669	0.00805619	1.23183	1.23183	3.44564	1
Gga.7265.1.S1_at	424739	SCLY	Selenocysteine lyase	NM_001139463 /// XM_422561	0.00398671	0.00122549	1.23162	1.23162	5.42756	1
GgaAffx.12776.1.S1_at	425626	PEO1	progressive external ophthalmoplegia 1	NM_001031344 /// XM_001236713	0.0762163	0.0431947	1.23151	1.23151	2.48748	1
Gga.4844.1.S1_at	---	---	---	---	0.246631	0.0332674	1.23125	1.23125	1.47668	1
Gga.6383.1.S1_at	777130	PPP2R1B	Protein phosphatase 2 (formerly 2A), regulatory subunit A, beta isoform	XM_001236601	0.241834	0.0363347	1.23122	1.23122	1.49332	1
Gga.6862.1.A1_at	770926	LOC770926	Similar to Feather keratin II (Keratin gene B protein) (F-ker)	XM_001234239	0.148496	0.0391971	1.2312	1.2312	1.90777	1
GgaAffx.1650.1.S1_s_at	423985	WDR75	WD repeat domain 75	XM_001233407	0.0912932	0.0173718	1.23095	1.23095	2.32852	1
Gga.14047.1.S1_at	---	---	---	---	0.542149	0.479636	1.23092	1.23092	0.79529	1
Gga.17365.1.S1_at	---	---	---	---	0.227971	0.0253419	1.23089	1.23089	1.54332	1
NC-002641.CDS58.S1_at	---	---	---	---	0.154871	0.0248325	1.23083	1.23083	1.87184	1
Gga.16522.1.S1_at	---	---	---	---	0.503865	0.339514	1.23077	1.23077	0.861403	1
Gga.12221.2.S1_at	415353	ETFA	electron-transfer-flavoprotein, alpha polypeptide (glutaric aciduria II)	NM_001030543	0.111628	0.0702554	1.23077	1.23077	2.15336	1
GgaAffx.24224.1.S1_at	430610	LOC430610	hypothetical LOC430610	XR_026876	0.300316	0.0849453	1.23073	1.23073	1.30966	1
GgaAffx.20184.1.S1_at	---	---	---	---	0.179386	0.0702133	1.23073	1.23073	1.74664	1
GgaAffx.11032.2.S1_at	418990	ARHGAP42	Rho GTPase activating protein 42	XM_417185	0.0326947	0.00343571	1.23048	1.23048	3.25944	1
GgaAffx.7440.1.S1_at	421592 /// 421610	LOC421592 /// UTRN	similar to utrophin (homologous to dystrophin) /// utrophin	XM_419629 /// XM_419648	0.00162932	0.191398	1.23022	1.23022	6.48211	1
Gga.15259.1.A1_at	---	---	---	---	0.0501125	0.00631919	1.2302	1.2302	2.86403	1
Gga.4759.1.S1_at	769030	AIMP2	aminoacyl tRNA synthetase complex-interacting multifunctional protein 2	XM_001232212	0.204539	0.120798	1.23019	1.23019	1.63523	1
Gga.15835.1.S1_at	---	---	---	---	0.279859	0.0379146	1.23019	1.23019	1.36956	1
GgaAffx.11170.1.S1_at	777153	LOC777153	similar to polymerase	XR_026826	0.151488	0.0313038	1.23015	1.23015	1.89071	1
GgaAffx.12302.1.S1_s_at	770217	CHAF1A	chromatin assembly factor 1, subunit A (p150)	NM_001079752 /// XM_001233551	0.00823831	0.00225456	1.23012	1.23012	4.63394	1
GgaAffx.21359.1.S1_at	---	---	---	---	0.359251	0.198163	1.23004	1.23004	1.15676	1
Gga.17927.1.S1_at	---	---	---	---	0.266623	0.0452642	1.23001	1.23001	1.41065	1
GgaAffx.4600.2.S1_at	416080	ADAMTS9	ADAM metallopeptidase with thrombospondin type 1 motif, 9	XM_414417	0.0653787	0.00959264	1.22998	1.22998	2.62398	1
Gga.11044.1.S1_at	---	---	---	---	0.00249996	0.0711279	1.22997	1.22997	5.96655	1
GgaAffx.9009.1.A1_at	---	---	---	---	0.270115	0.121658	1.22987	1.22987	1.39961	1
Gga.17458.1.S1_s_at	422817	GPR125	G protein-coupled receptor 125	XM_420763	0.014279	0.032174	1.22976	1.22976	4.06603	1
Gga.15071.1.S1_at	426622	LOC426622	hypothetical LOC426622	XM_001232988 /// XM_424253	0.107874	0.0531861	1.22976	1.22976	2.18302	1
GgaAffx.26315.1.S1_s_at	415957	IARS	isoleucyl-tRNA synthetase	XM_414300	0.0846286	0.150536	1.22974	1.22974	2.39506	1
Gga.12282.1.S1_at	---	---	---	---	0.00301545	0.00251214	1.22973	1.22973	5.74721	1
GgaAffx.21032.1.S1_at	---	---	---	---	0.0830719	0.0202762	1.22971	1.22971	2.41141	1
Gga.6983.1.S1_at	416660	MGRN1	mahogunin, ring finger 1	XM_414957	0.0627195	0.0521839	1.22968	1.22968	2.66117	1
GgaAffx.9944.1.S1_at	422871	C4orf23	chromosome 4 open reading frame 23	XM_420816	0.00452874	0.000828768	1.22967	1.22967	5.28435	1
Gga.3160.1.S1_at	---	---	---	---	0.0130877	0.0179459	1.22963	1.22963	4.15417	1
Gga.1148.1.S2_at	396169	ST6GAL1	ST6 beta-galactosamide alpha-2,6-sialyltranferase 1	NM_205241	0.251418	0.234668	1.22955	1.22955	1.4604	1
Gga.14617.1.S1_at	---	---	---	---	0.0813168	0.00724238	1.22943	1.22943	2.43023	1
Gga.18089.1.S1_s_at	---	---	---	---	0.0598382	0.0144968	1.22927	1.22927	2.70342	1
Gga.13853.1.S1_at	---	---	---	---	0.0457548	0.112862	1.22926	1.22926	2.9472	1
GgaAffx.24698.1.S1_at	395292	ROBO1	roundabout, axon guidance receptor, homolog 1 (Drosophila)	XM_416673	0.0607265	0.0405446	1.22909	1.22909	2.69017	1
GgaAffx.6496.2.S1_s_at	417869	NAV3	neuron navigator 3	NM_001159347 /// XR_026728	0.196668	0.107587	1.22895	1.22895	1.66852	1
GgaAffx.12166.1.S1_at	419943	FTSJ3	FtsJ homolog 3 (E. coli)	NM_001030925	0.185353	0.0353096	1.22892	1.22892	1.71882	1
GgaAffx.12605.1.S1_at	417997	RANGAP1	Ran GTPase activating protein 1	NM_001006237	0.6721	0.20995	1.22884	1.22884	0.592406	1
Gga.12588.3.S1_a_at	415770	C19orf40	chromosome 19 open reading frame 40	XM_414132	0.0810749	0.0265555	1.22882	1.22882	2.43286	1
Gga.19450.1.S1_at	---	---	---	---	0.0358639	0.247726	1.2286	1.2286	3.17268	1
GgaAffx.24465.1.S1_s_at	426631	FNBP4	formin binding protein 4	XM_424260	0.637313	0.150034	1.22844	1.22844	0.644224	1
Gga.18980.1.S1_at	418074	NUAK1	NUAK family, SNF1-like kinase, 1	XM_416310	0.247995	0.0867077	1.22836	1.22836	1.47201	1
Gga.13056.1.S1_at	---	---	---	---	0.12255	0.0389641	1.22833	1.22833	2.07268	1
Gga.16940.1.S1_at	427211	IQGAP2	IQ motif containing GTPase activating protein 2	XR_026642	0.0105112	0.00886127	1.22823	1.22823	4.37896	1
Gga.5959.1.S1_at	---	---	---	---	0.00874223	0.00473678	1.22813	1.22813	4.5713	1
Gga.17791.1.A1_at	---	---	---	---	0.103588	0.0172477	1.22811	1.22811	2.21825	1
Gga.1951.1.S1_at	395771	GJB6	gap junction protein, beta 6, 30kDa	NM_204931	0.483187	0.253416	1.22808	1.22808	0.89877	1
GgaAffx.2452.1.S1_s_at	415386	APBA2	amyloid beta (A4) precursor protein-binding, family A, member 2 (X11-like)	XM_413771	0.318642	0.0666263	1.22794	1.22794	1.25926	1
GgaAffx.11485.1.S1_at	418791	ABCC4	ATP-binding cassette, sub-family C (CFTR/MRP), member 4	NM_001030819	0.171951	0.0313093	1.22779	1.22779	1.78265	1
GgaAffx.783.1.S1_at	419122	NCOA6	nuclear receptor coactivator 6	XM_417309	0.137039	0.0313231	1.22771	1.22771	1.97656	1
Gga.9366.1.S1_a_at	420870	RIOK1	RIO kinase 1 (yeast)	XM_418958	0.000722089	0.00178029	1.22768	1.22768	7.52171	1
Gga.17416.1.S1_at	---	---	---	---	0.15229	0.203947	1.22768	1.22768	1.8862	1
Gga.3271.1.S1_at	769726	LOC769726	similar to MGC80370 protein	XM_001231916	0.0922926	0.397348	1.22762	1.22762	2.31898	1
Gga.15784.2.S1_a_at	421758	C6orf186	chromosome 6 open reading frame 186	XM_419788	0.00180491	0.265695	1.2275	1.2275	6.35695	1
Gga.1258.1.S1_at	416288	CANX	Calnexin	NM_001030620	0.00524002	0.00678263	1.2275	1.2275	5.12249	1
Gga.19150.1.S1_s_at	777560	LOC777560	similar to similar to CDNA sequence BC043118	XM_001237000	0.259663	0.0396277	1.22747	1.22747	1.43306	1
GgaAffx.2301.2.S1_s_at	417171	NTNG2	netrin G2	XM_415454	0.080713	0.0671683	1.22746	1.22746	2.4368	1
GgaAffx.204.1.S1_s_at	419943	FTSJ3	FtsJ homolog 3 (E. coli)	NM_001030925	0.0464409	0.00912722	1.22743	1.22743	2.93356	1
GgaAffx.25386.3.S1_at	427612	DOCK2	dedicator of cytokinesis 2	XM_425184	0.00246431	0.00506645	1.22738	1.22738	5.98351	1
Gga.3297.1.S1_at	420769	GLI3	GLI-Kruppel family member GLI3 (Greig cephalopolysyndactyly syndrome)	XM_418866	0.296395	0.0748219	1.22734	1.22734	1.32082	1
Gga.5045.1.S1_at	---	---	---	---	0.0240043	0.00131578	1.22714	1.22714	3.55384	1
GgaAffx.5884.3.S1_at	423250	RBM25	RNA binding motif protein 25	XM_421170	0.280911	0.0556988	1.227	1.227	1.36638	1
Gga.9760.1.S1_at	419040	C12orf5	chromosome 12 open reading frame 5	XM_417232	0.239586	0.0944522	1.22689	1.22689	1.50123	1
Gga.12025.1.S1_at	417888	TMTC3	transmembrane and tetratricopeptide repeat containing 3	XM_416131	0.328433	0.0796578	1.22686	1.22686	1.23346	1
NC-001720.CDS21.S1_at	---	---	---	---	0.205684	0.024645	1.2268	1.2268	1.6305	1
GgaAffx.2358.1.S1_at	424409	RGS16	regulator of G-protein signaling 16	XM_422252	0.341652	0.1166	1.22679	1.22679	1.19976	1
Gga.10956.1.S1_at	424807	AP1S3	adaptor-related protein complex 1, sigma 3 subunit	NM_001030008	0.105247	0.159139	1.22677	1.22677	2.20443	1
GgaAffx.22863.1.S1_s_at	416757	TELO2	TEL2, telomere maintenance 2, homolog (S. cerevisiae)	XM_415052	0.0061316	0.00633154	1.2267	1.2267	4.95056	1
Gga.8906.3.S1_at	423479	EIF5	eukaryotic translation initiation factor 5	NM_001006488	0.0695202	0.00606209	1.22669	1.22669	2.56915	1
GgaAffx.9623.1.S1_at	418359	WDR52	WD repeat domain 52	XM_416579	0.056398	0.00346972	1.22666	1.22666	2.75682	1
Gga.14013.1.S1_at	---	---	---	---	0.0471544	0.00443132	1.22664	1.22664	2.9196	1
Gga.13223.1.S1_at	427184	TTC33	tetratricopeptide repeat domain 33	XM_001232650 /// XM_424771	0.317381	0.094506	1.22655	1.22655	1.26263	1
GgaAffx.11505.1.S1_s_at	422912	IMMT	inner membrane protein, mitochondrial (mitofilin)	NM_001006462	0.0563547	0.0205133	1.22651	1.22651	2.75751	1
GgaAffx.1795.1.S1_at	424780	TFDP2	transcription factor Dp-2 (E2F dimerization partner 2)	NM_001184713 /// XM_422598	0.0577599	0.0490948	1.2265	1.2265	2.73527	1
Gga.12286.1.S1_at	420573	TAC1	tachykinin, precursor 1 (substance K, substance P, neurokinin 1, neurokinin 2, n	XM_418674	0.539546	0.560933	1.22645	1.22645	0.79967	1
GgaAffx.11002.1.S1_at	418969	CUL5	cullin 5	XM_417163	0.419751	0.0799153	1.22638	1.22638	1.0224	1
GgaAffx.26097.1.S1_at	416457	GPER	G protein-coupled estrogen receptor 1	NM_001162405 /// XM_414765	0.270854	0.202141	1.22621	1.22621	1.3973	1
GgaAffx.10047.1.S1_at	421811	MDN1	MDN1, midasin homolog (yeast)	XM_419835	0.234986	0.053764	1.22602	1.22602	1.51765	1
Gga.7604.2.S1_a_at	424883	PLSCR1	phospholipid scramblase 1	XM_001231236 /// XM_422696	0.163766	0.127971	1.22599	1.22599	1.82419	1
Gga.2341.2.S1_s_at	---	---	---	---	0.169835	0.048451	1.22598	1.22598	1.79319	1
GgaAffx.24699.1.S1_at	421799	C6orf167	chromosome 6 open reading frame 167	XM_419826	0.175456	0.0419814	1.22584	1.22584	1.76548	1
Gga.8237.2.S1_at	---	---	---	---	0.213052	0.047843	1.22582	1.22582	1.60066	1
GgaAffx.24756.1.S1_at	---	---	---	---	0.0803983	0.00943549	1.2258	1.2258	2.44025	1
GgaAffx.20326.1.S1_s_at	---	---	---	---	0.224313	0.120007	1.22566	1.22566	1.55702	1
Gga.10144.1.A1_at	---	---	---	---	0.0455158	0.0030452	1.22563	1.22563	2.95201	1
Gga.159.1.S1_at	373920	MID1	midline 1	NM_204129	0.0646243	0.067243	1.2256	1.2256	2.63437	1
Gga.2379.1.S1_at	426582	LOC426582	similar to KIAA0614 protein	XM_415176	0.0542045	0.00426979	1.22546	1.22546	2.79271	1
Gga.13371.1.S1_at	423120	FADS1	fatty acid desaturase 1	XM_421052	0.090912	0.179403	1.22542	1.22542	2.33218	1
Gga.14899.1.S1_s_at	422555	WWC2	WW and C2 domain containing 2	XM_420516	0.490767	0.094329	1.22537	1.22537	0.884926	1
GgaAffx.9212.1.S1_s_at	422825	PROM1	prominin 1	XM_001232164	0.188684	0.0290097	1.22535	1.22535	1.7037	1
GgaAffx.26611.1.S1_s_at	423046	IPO7	importin 7	XR_026868	0.103382	0.0134136	1.22531	1.22531	2.21998	1
Gga.1259.1.S1_at	395413	LOC395413	histone acetyltransferase MYST	---	0.184466	0.0567521	1.22522	1.22522	1.7229	1
Gga.12397.1.S1_at	417193	PTGES	prostaglandin E synthase	XM_415475	0.0184153	0.234368	1.22519	1.22519	3.81239	1
GgaAffx.2167.1.S1_at	428995	VWC2L	von Willebrand factor C domain-containing protein 2-like	XM_426552	0.331825	0.121125	1.22518	1.22518	1.22469	1
Gga.19194.1.S1_at	---	---	---	---	0.571683	0.440178	1.22518	1.22518	0.746626	1
Gga.7294.1.S1_at	416386	ABCA3	ATP-binding cassette, sub-family A (ABC1), member 3	XM_414701	0.00383965	0.000322606	1.22516	1.22516	5.47011	1
GgaAffx.220.1.S1_at	426076	DHTKD1	dehydrogenase E1 and transketolase domain containing 1	XM_423753	0.0458578	0.00973862	1.2251	1.2251	2.94514	1
Gga.12212.1.S1_a_at	427162	CENPK	centromere protein K	NM_001044663	0.0674126	0.155677	1.22508	1.22508	2.59661	1
Gga.16709.1.S1_at	---	---	---	---	0.160998	0.173184	1.22505	1.22505	1.83873	1
Gga.6030.1.S1_s_at	100216364	PSMD4	proteasome (prosome, macropain) 26S subunit, non-ATPase, 4	NM_001142390	0.0315563	0.00627993	1.22503	1.22503	3.29284	1
Gga.15402.1.S1_at	---	---	---	---	0.166727	0.173948	1.22502	1.22502	1.80892	1
GgaAffx.335.1.S1_s_at	426697	SARS	seryl-tRNA synthetase	NM_001031392 /// XM_001236907	0.212842	0.0220477	1.22496	1.22496	1.6015	1
Gga.17471.1.S1_at	419634	KIAA0319L	KIAA0319-like	XM_417781	0.396661	0.111382	1.22496	1.22496	1.07147	1
Gga.5295.1.S1_at	424189	PSMD14	proteasome (prosome, macropain) 26S subunit, non-ATPase, 14	NM_001031256	0.111551	0.0349582	1.22492	1.22492	2.15396	1
GgaAffx.26547.2.S1_s_at	422210	MED12	Mediator of RNA polymerase II transcription, subunit 12 homolog (S. cerevisiae)	XR_027012	0.1806	0.0543687	1.22483	1.22483	1.7409	1
Gga.8363.1.S1_at	395152	AXIN2	axin 2	NM_204491	0.0451069	0.0260352	1.22479	1.22479	2.96029	1
Gga.565.1.S1_at	395950	GBX2	gastrulation brain homeobox 2	NM_205068	0.0133758	0.179778	1.22458	1.22458	4.13208	1
GgaAffx.9429.1.S1_s_at	421059	LPIN2	lipin 2	NM_001006386	0.368704	0.0593923	1.22452	1.22452	1.13446	1
Gga.17280.1.S1_at	423617	PARG	Poly (ADP-ribose) glycohydrolase	XM_421502	0.0163952	0.00305827	1.22452	1.22452	3.92756	1
GgaAffx.7766.2.S1_s_at	420758	GOLGA4	golgi autoantigen, golgin subfamily a, 4	XM_418856	0.443188	0.394699	1.22451	1.22451	0.97497	1
Gga.19065.1.S1_at	---	---	---	---	0.631606	0.155769	1.22449	1.22449	0.652866	1
Gga.4287.1.S1_at	396021	PPP2CB	protein phosphatase 2 (formerly 2A), catalytic subunit, beta isoform	NM_205124	0.514733	0.17478	1.22444	1.22444	0.842252	1
Gga.19795.1.S1_at	---	---	---	---	0.428883	0.12969	1.22438	1.22438	1.00365	1
Gga.14398.1.S1_at	---	---	---	---	0.0755346	0.174767	1.22427	1.22427	2.49544	1
GgaAffx.6954.1.S1_at	421514	LYST	lysosomal trafficking regulator	XM_419558	0.199054	0.253921	1.22425	1.22425	1.65829	1
Gga.11115.1.S1_at	416593	UNKL	unkempt homolog (Drosophila)-like	XM_414893	0.0859835	0.0924471	1.22404	1.22404	2.38109	1
Gga.14907.1.S1_at	418465	LOC418465	hypothetical gene supported by CR386478	XM_429584	0.00753396	0.000729434	1.22392	1.22392	4.72887	1
GgaAffx.25879.3.S1_s_at	420130	MAST3	microtubule associated serine/threonine kinase 3	XM_418247	0.390787	0.0829995	1.22376	1.22376	1.08436	1
GgaAffx.24444.1.S1_s_at	426582	LOC426582	similar to KIAA0614 protein	XM_415176	0.0774655	0.00902116	1.22375	1.22375	2.47309	1
Gga.16789.1.S1_at	417264	RPL12	Ribosomal protein L12	XM_415539	0.380856	0.0853222	1.22364	1.22364	1.10656	1
GgaAffx.9412.1.A1_at	---	---	---	---	0.0837485	0.0266499	1.22362	1.22362	2.40426	1
GgaAffx.7631.1.S1_at	421599	QSER1	glutamine and serine rich 1	XM_419636	0.145338	0.0524911	1.22358	1.22358	1.92616	1
Gga.4982.1.S1_at	395492	LOC395492	Aldolase A	---	0.519303	0.188975	1.22357	1.22357	0.834292	1
GgaAffx.4265.1.S1_at	416608	SYT17	synaptotagmin XVII	XM_414910	0.407289	0.0993929	1.22329	1.22329	1.04857	1
Gga.3377.1.S1_at	---	---	---	---	0.103439	0.0433593	1.22322	1.22322	2.2195	1
Gga.7604.1.S1_at	424883	PLSCR1	phospholipid scramblase 1	XM_001231236 /// XM_422696	0.187931	0.0633893	1.22313	1.22313	1.70709	1
GgaAffx.22560.1.S1_s_at	425900	ANKRD12	ankyrin repeat domain 12	XM_423591	0.0355907	0.0094272	1.22312	1.22312	3.17983	1
Gga.16452.1.S1_at	---	---	---	---	0.304544	0.0519095	1.2231	1.2231	1.29777	1
GgaAffx.12825.1.S1_s_at	421059	LPIN2	lipin 2	NM_001006386	0.150938	0.0440543	1.22308	1.22308	1.89382	1
Gga.11350.3.S1_s_at	418623	ACE2	angiotensin I converting enzyme (peptidyl-dipeptidase A) 2	XM_416822	0.266968	0.0586518	1.22306	1.22306	1.40955	1
GgaAffx.24326.1.S1_at	---	---	---	---	0.41431	0.0597488	1.22301	1.22301	1.03374	1
Gga.100.1.S1_a_at	395274	FAS	Fas (TNF receptor superfamily, member 6)	XM_421659	0.00492502	0.103738	1.22265	1.22265	5.19102	1
GgaAffx.6856.1.S1_at	395531	NID1	nidogen 1	XM_419556	0.0373574	0.00803549	1.22251	1.22251	3.13462	1
Gga.7215.2.S1_a_at	424367	HSD17B7	hydroxysteroid (17-beta) dehydrogenase 7	XM_001232165 /// XM_422210	0.100518	0.148456	1.22248	1.22248	2.24443	1
Gga.11677.1.S1_s_at	415724	TOX3	TOX high mobility group box family member 3	XM_414090	0.011953	0.0291323	1.22248	1.22248	4.24664	1
GgaAffx.2596.3.S1_s_at	423697	SUPV3L1	suppressor of var1, 3-like 1 (S. cerevisiae)	NM_001006498	0.121661	0.0834175	1.22246	1.22246	2.07896	1
GgaAffx.3929.1.S1_at	422244	GPR112	G protein-coupled receptor 112	XM_420232	0.019908	0.0167146	1.22246	1.22246	3.73577	1
GgaAffx.20910.1.S1_at	---	---	---	---	0.393291	0.14645	1.22223	1.22223	1.07884	1
Gga.2800.1.S1_at	396360	SLMAP	sarcolemma associated protein	NM_205395 /// XM_001232800	0.0169716	0.055499	1.22221	1.22221	3.89319	1
GgaAffx.11874.1.S1_at	421384	C1orf107	chromosome 1 open reading frame 107	NM_001031051	0.596814	0.276813	1.22219	1.22219	0.706576	1
Gga.12273.1.S1_at	422028	PINX1	PIN2/TERF1 interacting, telomerase inhibitor 1	XM_420036	0.0200555	0.0182887	1.22213	1.22213	3.72854	1
GgaAffx.21511.1.S1_at	428450	ATP2C1	ATPase, Ca++ transporting, type 2C, member 1	XM_426010	0.267167	0.0871528	1.22208	1.22208	1.40892	1
GgaAffx.7895.1.S1_at	417071	SBF1	SET binding factor 1	XM_415358 /// XM_423510	0.149563	0.0203936	1.22201	1.22201	1.90165	1
GgaAffx.6053.1.A1_at	396243	COL1A2	collagen, type I, alpha 2	NM_001079714 /// XM_001234350	0.431834	0.196657	1.22193	1.22193	0.997667	1
GgaAffx.20500.1.S1_s_at	428403	GARS	glycyl-tRNA synthetase	NM_001031510	0.0581374	0.060953	1.22189	1.22189	2.7294	1
GgaAffx.20185.1.S1_at	---	---	---	---	0.0596837	0.00629008	1.22175	1.22175	2.70575	1
GgaAffx.11792.1.S1_at	425058	SARNP	SAP domain containing ribonucleoprotein	NM_001031324	0.0496895	0.0261849	1.22152	1.22152	2.87176	1
AFFX-Gga-TrpnX-M_at	---	---	---	---	0.0114445	0.000815811	1.22134	1.22134	4.29122	1
GgaAffx.10277.1.S1_at	420285	SLC30A8	solute carrier family 30 (zinc transporter), member 8	XM_418398	0.40628	0.33232	1.22131	1.22131	1.05072	1
Gga.19332.1.S1_s_at	421337	MIA3	melanoma inhibitory activity family, member 3	XM_419399	0.200036	0.127206	1.22116	1.22116	1.65411	1
GgaAffx.8722.1.S1_at	421653	ZDHHC14	zinc finger, DHHC-type containing 14	XM_001232231 /// XM_419692	0.892742	0.478894	1.22115	1.22115	0.271675	1
Gga.11361.1.S1_at	445339	BNC2	basonuclin 2	---	0.27279	0.0855914	1.22111	1.22111	1.39126	1
GgaAffx.25871.1.S1_s_at	---	---	---	---	0.0547253	0.0744914	1.22093	1.22093	2.78405	1
Gga.5598.1.S1_at	---	---	---	---	0.0581271	0.0560334	1.22088	1.22088	2.72956	1
Gga.783.1.S1_at	396375	PTPRS	protein tyrosine phosphatase, receptor type, S	NM_205407	0.239411	0.114691	1.22083	1.22083	1.50185	1
Gga.7373.3.S1_a_at	424078	NDUFB3	NADH dehydrogenase (ubiquinone) 1 beta subcomplex, 3, 12kDa	XM_001232007 /// XM_421934	0.154121	0.0972659	1.2207	1.2207	1.87599	1
GgaAffx.24368.1.S1_s_at	---	---	---	---	0.128017	0.0837073	1.22062	1.22062	2.03508	1
GgaAffx.3270.1.S1_at	420386	ADCYAP1R1	adenylate cyclase activating polypeptide 1 (pituitary) receptor type I	NM_001098606 /// XM_418491	0.279334	0.0701012	1.22058	1.22058	1.37115	1
GgaAffx.21046.1.S1_at	417565	TSR1	TSR1, 20S rRNA accumulation, homolog (S. cerevisiae)	XM_001234319	0.212352	0.0729402	1.22057	1.22057	1.60345	1
Gga.18422.1.S1_at	---	---	---	---	0.096008	0.168496	1.22053	1.22053	2.28447	1
GgaAffx.7395.1.S1_at	428595	PNLDC1	poly(A)-specific ribonuclease (PARN)-like domain containing 1	XM_426152	0.43501	0.0683881	1.22048	1.22048	0.991267	1
Gga.16878.1.S1_s_at	424652	GLIS1	GLIS family zinc finger 1	XM_422485	0.0668643	0.267254	1.22042	1.22042	2.6039	1
GgaAffx.5954.1.S1_at	421339	KIAA1822L	KIAA1822-like	XM_419401	0.260566	0.0388278	1.22037	1.22037	1.43012	1
GgaAffx.6644.1.S1_at	772083	AGBL4	ATP/GTP binding protein-like 4	XM_001235270	0.200194	0.0299985	1.22007	1.22007	1.65344	1
Gga.6448.1.S1_s_at	423088	PHLDA2	pleckstrin homology-like domain, family A, member 2	XM_421020	0.00685175	0.0563179	1.22006	1.22006	4.83052	1
Gga.15166.1.A1_at	---	---	---	---	0.11186	0.0141972	1.22001	1.22001	2.15156	1
Gga.6965.1.S1_at	---	---	---	---	0.221509	0.0391448	1.21995	1.21995	1.56768	1
Gga.5635.1.S1_at	424947	ABCC5	ATP-binding cassette, sub-family C (CFTR/MRP), member 5	XM_422754	0.0436745	0.024623	1.21981	1.21981	2.98996	1
GgaAffx.5648.1.S1_at	428554	LOC428554	similar to tandem pore domain potassium channel THIK-2	XR_026889	0.0222457	0.0576008	1.2198	1.2198	3.62748	1
GgaAffx.8763.1.S1_s_at	421025	DOK6	docking protein 6	XM_419111	0.378101	0.0659937	1.21977	1.21977	1.11281	1
Gga.2894.1.S1_at	396043	JAG1	jagged 1 (Alagille syndrome)	XM_415035	0.908856	0.439327	1.21976	1.21976	0.245734	1
Gga.10003.1.S1_at	416421	MKL2	MKL/myocardin-like 2	XM_414735	0.305646	0.058431	1.21976	1.21976	1.2947	1
Gga.7571.1.S1_at	415523	SNRPA1	small nuclear ribonucleoprotein polypeptide A'	XM_413891	0.162129	0.0228595	1.21976	1.21976	1.83275	1
Gga.6769.1.S1_at	---	---	---	---	0.506089	0.306026	1.21974	1.21974	0.857457	1
Gga.6118.1.S1_at	---	---	---	---	0.16552	0.0234925	1.21971	1.21971	1.81511	1
Gga.12378.1.S1_at	---	---	---	---	0.0663365	0.0592325	1.21969	1.21969	2.61098	1
Gga.16009.1.S1_at	---	---	---	---	0.17576	0.0267954	1.21962	1.21962	1.764	1
GgaAffx.20235.1.S1_s_at	416799	PUS1	Pseudouridylate synthase 1	XM_415090	0.0175805	0.084096	1.2196	1.2196	3.85824	1
Gga.12100.1.S1_at	419209	SULF2	sulfatase 2	XM_417386	0.216209	0.068897	1.21959	1.21959	1.5882	1
GgaAffx.20100.1.S1_at	423118	CPT1A	carnitine palmitoyltransferase 1A (liver)	NM_001012898	0.80095	0.463249	1.21956	1.21956	0.407646	1
Gga.11335.1.A1_at	407089	MASP2	mannan-binding lectin serine peptidase 2	NM_213587	0.035473	0.0213494	1.21919	1.21919	3.18293	1
Gga.18825.1.S1_at	418506	ITSN1	intersectin 1 (SH3 domain protein)	XM_416715	0.102382	0.0486893	1.21918	1.21918	2.22844	1
GgaAffx.24608.1.S1_at	427242	C9orf93	chromosome 9 open reading frame 93	XR_026890	0.13313	0.0129281	1.2191	1.2191	2.0014	1
Gga.2286.2.S1_at	419454	EXOSC10	exosome component 10	NM_001012730	0.119335	0.0104306	1.21899	1.21899	2.09562	1
GgaAffx.6836.1.S1_at	422570	WDR17	WD repeat domain 17	XR_027025	0.525923	0.491837	1.21899	1.21899	0.822859	1
GgaAffx.1153.1.S1_s_at	416380	CCDC5	coiled-coil domain containing 5 (spindle associated)	NM_001030625	0.223035	0.181058	1.21896	1.21896	1.56186	1
Gga.11607.1.A1_a_at	416570	TNRC6A	Trinucleotide repeat containing 6A	XM_414871	0.153211	0.0325211	1.21889	1.21889	1.88105	1
Gga.5534.1.S1_at	419980	PHB	prohibitin	NM_001177735 /// XM_001233467 /// XM_418103	0.0107243	0.0126684	1.21888	1.21888	4.3582	1
GgaAffx.20341.1.S1_s_at	419470	KIAA0090	KIAA0090	NM_001012838	0.177332	0.106116	1.2188	1.2188	1.75643	1
Gga.4618.1.S1_at	771447	SRM	spermidine synthase	XM_001234727	0.0839198	0.0351728	1.21876	1.21876	2.40247	1
Gga.9513.1.S2_at	395180	CXCL12	Chemokine (C-X-C motif) ligand 12 (stromal cell-derived factor 1)	NM_204510	0.672019	0.179023	1.21874	1.21874	0.592525	1
Gga.7078.2.S1_at	---	---	---	---	0.157091	0.070389	1.21861	1.21861	1.85969	1
GgaAffx.20970.1.S1_at	---	---	---	---	0.565891	0.297515	1.21859	1.21859	0.756026	1
Gga.3047.1.S1_at	395997	EPHA5	EPH receptor A5	NM_205105	0.379381	0.0857054	1.21857	1.21857	1.10991	1
Gga.1329.1.S1_at	374115	ARNTL	aryl hydrocarbon receptor nuclear translocator-like	NM_001001463	0.0160054	0.00729162	1.21856	1.21856	3.95155	1
Gga.7934.1.S1_at	417523	MMP28	matrix metallopeptidase 28	XM_415771	0.144276	0.126323	1.21838	1.21838	1.93244	1
Gga.12383.1.S1_at	427214	CRHBP	corticotropin releasing hormone binding protein	XM_424801	0.716682	0.594614	1.2183	1.2183	0.527693	1
Gga.17654.1.S1_at	424713	LRRC40	leucine rich repeat containing 40	NM_001031295	0.0912974	0.00776754	1.21828	1.21828	2.32848	1
Gga.5026.1.S1_at	---	---	---	---	0.0285333	0.0348043	1.21813	1.21813	3.38826	1
GgaAffx.24317.1.S1_s_at	421052	FAM38B	family with sequence similarity 38, member B	XM_419138	0.16388	0.0824054	1.21808	1.21808	1.8236	1
Gga.5704.1.S1_at	421274	CEP68	centrosomal protein 68kDa	XM_419343	0.0344982	0.0709635	1.21807	1.21807	3.20901	1
Gga.15176.1.S1_at	---	---	---	---	0.241673	0.121998	1.21804	1.21804	1.49388	1
Gga.11160.1.A1_at	771791	CTSE	cathepsin E	XM_001235023	0.0776817	0.0186098	1.218	1.218	2.47062	1
Gga.6457.2.S1_at	420237	MTERFD1	MTERF domain containing 1	NM_001006348	0.16306	0.0357134	1.21791	1.21791	1.82788	1
Gga.13975.1.S1_s_at	414740	EIF1AD	eukaryotic translation initiation factor 1A domain containing	NM_001001612	0.142922	0.0563698	1.21779	1.21779	1.94052	1
Gga.1969.1.S1_at	423523	LOC423523	hypothetical LOC423523	XM_430063	0.339401	0.216417	1.21777	1.21777	1.20541	1
GgaAffx.26182.1.S1_s_at	415406	NEDD4	neural precursor cell expressed, developmentally down-regulated 4	XM_413791	0.313766	0.0608616	1.21773	1.21773	1.27239	1
GgaAffx.9585.1.S1_s_at	427238 /// 427239	HAUS6 /// LOC427239	HAUS augmin-like complex, subunit 6 /// hypothetical LOC427239	NM_001031421 /// XM_424824	0.389993	0.0937295	1.2177	1.2177	1.08612	1
GgaAffx.7341.1.S1_s_at	421582	SLC22A3	solute carrier family 22 (extraneuronal monoamine transporter), member 3	XM_419620	0.902805	0.386459	1.21766	1.21766	0.255603	1
Gga.18126.1.S1_at	415463	HDGFRP3	Hepatoma-derived growth factor, related protein 3	XM_413841	0.00349686	0.0260235	1.21766	1.21766	5.57662	1
Gga.719.2.S1_a_at	396239	BRAF	v-raf murine sarcoma viral oncogene homolog B1	NM_205302	0.30464	0.301756	1.2176	1.2176	1.2975	1
GgaAffx.1484.1.S1_at	427385	DMXL1	Dmx-like 1	XM_424958	0.524552	0.155299	1.21758	1.21758	0.825218	1
Gga.16426.1.S1_at	---	---	---	---	0.162612	0.0223598	1.2175	1.2175	1.83022	1
Gga.7439.2.A1_at	---	---	---	---	0.0918029	0.00937368	1.21744	1.21744	2.32364	1
GgaAffx.12405.1.S1_at	418841	NUFIP1	nuclear fragile X mental retardation protein interacting protein 1	NM_001030825	0.0248385	0.051442	1.21743	1.21743	3.52093	1
Gga.5480.1.S1_a_at	417841	NUP107	nucleoporin 107kDa	XM_416082	0.0426875	0.00833506	1.2173	1.2173	3.01102	1
GgaAffx.21456.1.S1_s_at	422697	NOLA1	Nucleolar protein family A, member 1 (H/ACA small nucleolar RNPs)	XM_420650	0.0822452	0.103869	1.21723	1.21723	2.42022	1
Gga.5418.1.S1_at	417293	LOC417293	similar to MGC84171 protein	XM_415566	0.235629	0.0842937	1.21722	1.21722	1.51533	1
GgaAffx.21553.1.S1_s_at	416793	LOC416793	similar to autism susceptibility candidate 2; autism-related protein 1	XM_415087	0.150413	0.0278795	1.21722	1.21722	1.8968	1
GgaAffx.21708.1.S1_s_at	---	---	---	---	0.10898	0.0303106	1.2171	1.2171	2.17417	1
GgaAffx.3526.1.S1_at	416005	LOC416005	hypothetical LOC416005	XR_027205	0.176211	0.287004	1.21705	1.21705	1.76182	1
Gga.13788.1.S1_at	---	---	---	---	0.157088	0.114368	1.21704	1.21704	1.85971	1
Gga.5699.1.S1_at	768991	ARL16	ADP-ribosylation factor-like 16	XM_001232171	0.329265	0.0684133	1.217	1.217	1.2313	1
GgaAffx.6073.1.S1_at	417805	SFRS2IP	splicing factor, arginine/serine-rich 2, interacting protein	XM_416047	0.292939	0.0354077	1.2169	1.2169	1.33079	1
GgaAffx.2499.1.S1_at	417580	PHF12	PHD finger protein 12	XM_415826	0.406562	0.0669719	1.21685	1.21685	1.05013	1
Gga.10282.2.S1_a_at	419321	C20orf85	Chromosome 20 open reading frame 85	XM_417493	0.00288663	0.102186	1.21677	1.21677	5.79795	1
Gga.16659.1.S1_at	---	---	---	---	0.0257617	0.0136144	1.21673	1.21673	3.48587	1
GgaAffx.24279.1.S1_at	426258	LSMD1	LSM domain containing 1	XM_423923	0.192093	0.0375156	1.21672	1.21672	1.68849	1
Gga.14562.1.S1_at	---	---	---	---	0.32674	0.173524	1.21653	1.21653	1.23786	1
Gga.2606.1.A1_at	---	---	---	---	0.626678	0.300234	1.21652	1.21652	0.660363	1
GgaAffx.930.1.S1_at	415297	UBL7	ubiquitin-like 7 (bone marrow stromal cell-derived)	XM_413686	0.33277	0.0959206	1.21652	1.21652	1.22226	1
GgaAffx.22583.1.S1_s_at	423202	MAPK8IP1	mitogen-activated protein kinase 8 interacting protein 1	XM_421126	0.0033481	0.0014407	1.2165	1.2165	5.62645	1
Gga.5619.3.S1_a_at	776399	LOC776399	similar to Solute carrier family 30 (zinc transporter), member 4	XM_001235923	0.221178	0.155744	1.21648	1.21648	1.56894	1
Gga.190.1.S1_at	395377	GBX1	gastrulation brain homeobox 1	NM_204659	0.00411481	0.00904169	1.21648	1.21648	5.39187	1
Gga.14736.1.S1_at	---	---	---	---	0.0298849	0.0025696	1.21647	1.21647	3.34431	1
Gga.6860.1.A1_at	---	---	---	---	0.469074	0.330888	1.21643	1.21643	0.925031	1
Gga.3671.1.S1_at	396371	LOC396371	Rous sarcoma virus transcription enhancer factor II	NM_205406	0.00162401	0.00127085	1.2164	1.2164	6.48611	1
Gga.2038.1.S1_at	374011	MAB21L2	mab-21-like 2 (C. elegans)	NM_204190	0.0499743	0.0483523	1.21638	1.21638	2.86655	1
GgaAffx.26476.1.S1_at	415992	DCP1A	DCP1 decapping enzyme homolog A (S. cerevisiae)	XM_001233130	0.170102	0.0669718	1.21637	1.21637	1.79185	1
AY510475.CDS9.S1_s_at	---	---	---	---	0.0779884	0.0160414	1.21634	1.21634	2.46714	1
GgaAffx.20151.1.S1_s_at	---	---	---	---	0.0422348	0.00841984	1.21634	1.21634	3.02085	1
GgaAffx.24465.1.S1_at	426631	FNBP4	formin binding protein 4	XM_424260	0.572695	0.129923	1.21623	1.21623	0.74499	1
Gga.6020.2.S1_at	425131	TRIM3	tripartite motif-containing 3	XM_422922	0.333589	0.0959819	1.21623	1.21623	1.22017	1
Gga.18592.1.S1_at	---	---	---	---	0.194315	0.17181	1.21615	1.21615	1.67873	1
Gga.15092.1.S1_at	---	---	---	---	0.085913	0.0174573	1.21613	1.21613	2.38182	1
GgaAffx.25298.1.S1_at	---	---	---	---	0.170881	0.02593	1.21609	1.21609	1.78796	1
GgaAffx.10484.1.S1_at	420346	ATAD2	ATPase family, AAA domain containing 2	XM_418453	0.0928257	0.108098	1.21605	1.21605	2.31394	1
Gga.9752.1.S1_at	416743	ITPKB	inositol 1,4,5-trisphosphate 3-kinase B	XM_415039	0.0939678	0.0513969	1.21604	1.21604	2.30325	1
Gga.12664.1.S1_at	416549	ZNF598	Zinc finger protein 598	XM_001233823 /// XM_001233836 /// XM_414850	0.0244357	0.00166899	1.21599	1.21599	3.53667	1
GgaAffx.6670.1.S1_at	421466	CYP1B1	cytochrome P450, family 1, subfamily B, polypeptide 1	XM_419515	0.951441	0.468705	1.21596	1.21596	0.16947	1
Gga.331.1.S1_at	408183	CYP26A1	cytochrome P450, family 26, subfamily A, polypeptide 1	NM_001001129	0.552215	0.206005	1.2159	1.2159	0.778494	1
GgaAffx.22547.3.S1_s_at	421232	GZF1	GDNF-inducible zinc finger protein 1	XM_001232813	0.319573	0.0401622	1.21571	1.21571	1.25677	1
Gga.5073.1.S1_at	428141	LOC428141	similar to Trappin-6	XM_425699	0.770514	0.354031	1.21563	1.21563	0.450962	1
GgaAffx.24012.1.S1_at	418109	LOC418109	hypothetical LOC418109	XM_416343	0.329786	0.228553	1.21563	1.21563	1.22995	1
GgaAffx.9978.1.S1_s_at	418469	STCH	stress 70 protein chaperone, microsome-associated, 60kDa	NM_001030793	0.0253275	0.0592347	1.21559	1.21559	3.50219	1
Gga.19066.1.S1_s_at	416030	PLXNA1	plexin A1	XM_414370	0.00920452	0.00357828	1.21559	1.21559	4.5172	1
GgaAffx.25881.1.S1_s_at	417416 /// 771243	PECAM1 /// PECAM1	platelet/endothelial cell adhesion molecule /// platelet/endothelial cell adhesi	XM_001234535 /// XM_415668	0.091168	0.184072	1.21554	1.21554	2.32972	1
GgaAffx.6727.2.S1_s_at	423400	EML5	echinoderm microtubule associated protein like 5	XM_421310	0.113588	0.0677982	1.21552	1.21552	2.13829	1
Gga.12279.1.S1_at	420578	RPA3	replication protein A3, 14kDa	XM_418679	0.0836616	0.160489	1.2154	1.2154	2.40518	1
GgaAffx.24441.1.S1_s_at	422838	FAM44A	family with sequence similarity 44, member A	XM_420784	0.0702761	0.0405191	1.2154	1.2154	2.55952	1
Gga.4425.1.S2_at	396533	GOT2	glutamic-oxaloacetic transaminase 2, mitochondrial (aspartate aminotransferase 2	NM_205523	0.00825004	0.007145	1.21536	1.21536	4.63243	1
Gga.767.1.A1_at	396338	MTNR1B	melatonin receptor 1B	XM_417201	0.0275056	0.0276037	1.21522	1.21522	3.42321	1
Gga.12889.2.S1_a_at	417338	RAB40B	RAB40B, member RAS oncogene family	XM_415603	0.0556095	0.024358	1.21515	1.21515	2.76954	1
GgaAffx.25354.1.S1_at	---	---	---	---	0.0374752	0.00331705	1.21512	1.21512	3.13169	1
Gga.469.1.S1_at	396039	FOXC2	forkhead box C2 (MFH-1, mesenchyme forkhead 1)	NM_205138	0.139391	0.0662842	1.2151	1.2151	1.96196	1
GgaAffx.21488.1.S1_at	416721	CSRP2BP	CSRP2 binding protein	XM_415019	0.758411	0.264536	1.21508	1.21508	0.468154	1
Gga.14223.1.S1_at	---	---	---	---	0.289579	0.0764832	1.21497	1.21497	1.34058	1
Gga.18781.1.S1_at	---	---	---	---	0.587598	0.130057	1.21483	1.21483	0.721129	1
GgaAffx.6215.3.S1_s_at	423302	PRKD1	protein kinase D1	NM_001031201	0.161937	0.0892371	1.21481	1.21481	1.83376	1
GgaAffx.12605.1.S1_s_at	417997	RANGAP1	Ran GTPase activating protein 1	NM_001006237	0.0322596	0.0317614	1.21479	1.21479	3.27205	1
GgaAffx.26207.1.S1_at	415854	FANCA	Fanconi anemia, complementation group A	NM_001134359 /// XM_414214	0.0072446	0.00217645	1.21474	1.21474	4.77071	1
GgaAffx.3897.1.S1_at	424851	KLHL30	kelch-like 30 (Drosophila)	XM_422662	0.0436681	0.00987841	1.21471	1.21471	2.9901	1
GgaAffx.8002.1.S1_at	418064	C22orf28	chromosome 22 open reading frame 28	XM_416300	0.0201581	0.121261	1.21464	1.21464	3.72354	1
GgaAffx.26407.1.S1_at	424804	CUL3	cullin 3	XM_422620	0.0630805	0.0133271	1.21463	1.21463	2.65603	1
Gga.3223.1.S1_at	422161	YIPF6	Yip1 domain family, member 6	XM_420160	0.0174621	0.0031319	1.21447	1.21447	3.86493	1
Gga.3696.1.S1_at	396104	SOX11	SRY (sex determining region Y)-box 11	NM_205187	0.188198	0.0196734	1.2143	1.2143	1.70589	1
Gga.654.1.S1_at	396107	RET	ret proto-oncogene	NM_205190	0.0917606	0.0337343	1.21427	1.21427	2.32405	1
GgaAffx.25232.1.S1_s_at	429929	GADD45B	growth arrest and DNA-damage-inducible, beta	NM_001044666 /// XM_001232965	0.0034824	0.0275295	1.21425	1.21425	5.58136	1
Gga.19670.1.A1_at	---	---	---	---	0.0952018	0.0102097	1.21424	1.21424	2.29184	1
GgaAffx.339.1.S1_at	419816	RAB44	RAB44, member RAS oncogene family	XM_417952	0.0445646	0.0207004	1.2142	1.2142	2.97141	1
Gga.7658.1.S1_at	---	---	---	---	0.234169	0.196403	1.21417	1.21417	1.5206	1
Gga.4690.3.S1_a_at	431122	NUP160	nucleoporin 160kDa	XM_001232606	0.221159	0.0992688	1.21416	1.21416	1.56902	1
Gga.18815.1.S1_at	---	---	---	---	0.340148	0.16076	1.2141	1.2141	1.20353	1
GgaAffx.24012.3.S1_s_at	418109	LOC418109	hypothetical LOC418109	XM_416343	0.271627	0.121649	1.2141	1.2141	1.39488	1
Gga.1607.2.A1_at	---	---	---	---	0.238562	0.0435629	1.2141	1.2141	1.50486	1
GgaAffx.24122.1.S1_s_at	420961	C9orf4	chromosome 9 open reading frame 4	XM_419045	0.0776277	0.0367348	1.21402	1.21402	2.47124	1
Gga.19934.1.S1_at	432368	SNAI2	snail homolog 2 (Drosophila)	XM_419196	0.901542	0.425772	1.21398	1.21398	0.257643	1
Gga.2877.1.S1_at	416189	DNAJC18	DnaJ (Hsp40) homolog, subfamily C, member 18	NM_001025609	0.0510763	0.00469784	1.21395	1.21395	2.84669	1
Gga.10277.1.A1_at	770758	SLC5A3	Solute carrier family 5 (inositol transporters), member 3	XM_001234083	0.0123037	0.0066524	1.21388	1.21388	4.21708	1
Gga.14013.1.S1_s_at	---	---	---	---	0.193656	0.0239976	1.21381	1.21381	1.68161	1
Gga.7382.1.S1_at	420446	NOM1	nucleolar protein with MIF4G domain 1	XM_418549	0.120704	0.162738	1.21367	1.21367	2.08577	1
GgaAffx.7747.2.S1_at	422702	TSPAN5	tetraspanin 5	XM_420654	0.111811	0.045752	1.21364	1.21364	2.15194	1
GgaAffx.8176.1.S1_at	428487	CDH9	cadherin 9, type 2 (T1-cadherin)	XM_001231501 /// XM_001231540 /// XM_001231576 /// XM_426044	0.00628681	0.0078483	1.21364	1.21364	4.92343	1
Gga.17269.1.S1_at	407778	ST6GALNAC5	ST6 (alpha-N-acetyl-neuraminyl-2,3-beta-galactosyl-1,3)-N-acetylgalactosaminide	XM_422393	0.115619	0.0481537	1.21363	1.21363	2.12295	1
GgaAffx.1524.1.S1_s_at	415328 /// 769181	CSNK1G1 /// LOC769181	casein kinase 1, gamma 1 /// similar to KIAA0101	NM_001005800 /// XM_001232407	0.0256346	0.0243402	1.21358	1.21358	3.49062	1
Gga.7960.1.S1_at	418154	WNT5B	wingless-type MMTV integration site family, member 5B	NM_001037269	0.302081	0.0434943	1.21332	1.21332	1.30467	1
Gga.19316.1.S1_at	772031	LOC772031	hypothetical protein LOC772031	XM_001235232	0.0913864	0.0466009	1.21324	1.21324	2.32762	1
Gga.2626.1.S1_at	396281	PTHLH	parathyroid hormone-like hormone	NM_001174106 /// NM_205338	0.564009	0.26207	1.2132	1.2132	0.759095	1
Gga.6525.1.A1_at	---	---	---	---	0.228934	0.0659324	1.21312	1.21312	1.53975	1
Gga.5501.1.S1_at	417381	DUS1L	dihydrouridine synthase 1-like (S. cerevisiae)	XM_001232802 /// XM_415637	0.072743	0.00498062	1.21306	1.21306	2.52884	1
Gga.10906.1.S1_a_at	---	---	---	---	0.233022	0.0667308	1.21301	1.21301	1.52476	1
Gga.5370.1.S1_at	---	---	---	---	0.155982	0.109092	1.21299	1.21299	1.86574	1
Gga.9477.1.S1_at	---	---	---	---	0.628562	0.200331	1.21298	1.21298	0.657494	1
Gga.4871.1.S1_at	428274	PSMC5	proteasome (prosome, macropain) 26S subunit, ATPase, 5	XM_425834	0.0132892	0.0101602	1.21295	1.21295	4.13867	1
GgaAffx.10582.2.A1_at	770888	LOC770888	similar to MGC84378 protein	XM_001234206	0.176834	0.0627415	1.21273	1.21273	1.75882	1
Gga.10109.1.S1_at	418437	LOC418437	similar to CDNA sequence BC043118	XR_026730	0.0131599	0.0470306	1.21265	1.21265	4.14858	1
Gga.18959.1.S1_at	423323	LOC423323	similar to RIKEN cDNA 1700047I17	NM_001031202	0.376052	0.10576	1.21259	1.21259	1.11749	1
Gga.3763.1.S1_at	419703 /// 768557	LOC419703 /// SIK2	hypothetical LOC419703 /// salt-inducible kinase 2	XM_001231563 /// XM_417848	0.00055804	0.00585565	1.21258	1.21258	7.86819	1
GgaAffx.24000.2.S1_s_at	420869	DSP	desmoplakin	XM_001231410 /// XM_418957	0.0175112	0.0462025	1.21256	1.21256	3.86215	1
GgaAffx.11032.1.S1_at	418990	ARHGAP42	Rho GTPase activating protein 42	XM_417185	0.145371	0.108408	1.21255	1.21255	1.92597	1
Gga.14470.1.A1_at	---	---	---	---	0.0693654	0.046481	1.21241	1.21241	2.57114	1
Gga.2986.2.S1_a_at	386582	RB1	retinoblastoma 1 (including osteosarcoma)	NM_204419	8.0561e-05	0.000288885	1.21231	1.21231	10.7662	1
Gga.8069.2.S1_a_at	416285	MGAT4B	mannosyl (alpha-1,3-)-glycoprotein beta-1,4-N-acetylglucosaminyltransferase, iso	XM_414605	0.000927277	0.0355997	1.2123	1.2123	7.19356	1
Gga.20015.1.S1_at	100310814	SEPW1	Selenoprotein W, 1	NM_001166327	0.378431	0.0565296	1.21227	1.21227	1.11206	1
GgaAffx.22341.1.S1_at	416999	AIFM3	apoptosis-inducing factor, mitochondrion-associated, 3	XM_415290	0.194606	0.0193732	1.21224	1.21224	1.67746	1
GgaAffx.9142.1.S1_at	422815	PPARGC1A	peroxisome proliferator-activated receptor gamma, coactivator 1 alpha	NM_001006457	0.222255	0.0359987	1.21218	1.21218	1.56483	1
Gga.6498.1.A1_at	---	---	---	---	0.00986769	0.00064204	1.21216	1.21216	4.44455	1
GgaAffx.9947.1.S1_at	---	---	---	---	0.387259	0.0589164	1.21212	1.21212	1.09219	1
Gga.9601.1.S1_at	425543	HP1BP3	Heterochromatin protein 1, binding protein 3	NM_001006560	0.0956786	0.0463089	1.21206	1.21206	2.28748	1
GgaAffx.6793.1.S1_at	428582	OPN3	opsin 3 (encephalopsin, panopsin)	XM_426139	0.191813	0.0692165	1.21199	1.21199	1.68973	1
Gga.9502.1.S1_s_at	395165	BHLHB4	basic helix-loop-helix domain containing, class B, 4	NM_204504	0.109877	0.30517	1.21198	1.21198	2.16706	1
GgaAffx.5913.1.S1_at	422409	TDO2	tryptophan 2,3-dioxygenase	XM_420377	0.470046	0.16504	1.21197	1.21197	0.923203	1
Gga.10616.2.S1_a_at	423536	LOC423536	similar to potassium channel, subfamily K, member 16; pancreatic 2P domain potas	XM_421431	0.142423	0.332657	1.21197	1.21197	1.94351	1
Gga.10252.1.S1_at	427446	OSMR	oncostatin M receptor	XM_425020	0.104985	0.0229288	1.21183	1.21183	2.2066	1
Gga.13347.2.S1_a_at	427848	RINT1	RAD50 interactor 1	XM_425422	0.0147831	0.0279453	1.21182	1.21182	4.03111	1
Gga.16168.1.S1_at	---	---	---	---	0.0393246	0.047294	1.2118	1.2118	3.08691	1
Gga.3316.1.S1_s_at	396182	HHEX	hematopoietically expressed homeobox	NM_205252	0.261959	0.02823	1.21168	1.21168	1.4256	1
Gga.8069.1.S1_at	416285	MGAT4B	mannosyl (alpha-1,3-)-glycoprotein beta-1,4-N-acetylglucosaminyltransferase, iso	XM_414605	0.00126599	0.0202644	1.21165	1.21165	6.79585	1
Gga.1989.1.S1_at	---	---	---	---	0.0573735	0.0387269	1.21164	1.21164	2.74133	1
Gga.13942.1.S1_at	---	---	---	---	0.28252	0.0928366	1.21164	1.21164	1.36153	1
GgaAffx.22749.2.S1_s_at	428281	EFTUD2	elongation factor Tu GTP binding domain containing 2	NM_001031501	0.278383	0.08493	1.2116	1.2116	1.37404	1
Gga.16764.1.S1_at	421733	NUS1	nuclear undecaprenyl pyrophosphate synthase 1 homolog (S. cerevisiae)	XM_419766	0.0755731	0.0131703	1.21153	1.21153	2.49499	1
Gga.10319.1.S1_at	420922 /// 776954	CTNND2 /// LOC776954	catenin (cadherin-associated protein), delta 2 (neural plakophilin-related arm-r	XM_001236442 /// XR_027019	0.0331187	0.0207793	1.21152	1.21152	3.24732	1
Gga.8127.1.S1_at	417709	PUS7	pseudouridylate synthase 7 homolog (S. cerevisiae)	XM_415954	0.0687216	0.0190446	1.21148	1.21148	2.57945	1
Gga.15060.1.S1_at	---	---	---	---	0.0474041	0.0239468	1.21147	1.21147	2.91476	1
Gga.4719.1.S1_s_at	396536	APOA1	apolipoprotein A-I	NM_205525 /// XM_423364	0.0598373	0.00739136	1.21145	1.21145	2.70344	1
Gga.18061.1.S1_at	---	---	---	---	0.162201	0.0937341	1.21137	1.21137	1.83238	1
GgaAffx.26038.1.S1_at	777455	KPNB1	karyopherin (importin) beta 1	XM_001236902	0.179016	0.0924378	1.21132	1.21132	1.74839	1
Gga.3857.1.S1_s_at	378893	FANCG	Fanconi anemia, complementation group G	NM_204378	0.0895395	0.112239	1.21132	1.21132	2.34552	1
Gga.7353.1.S1_at	418342	B4GALT3	UDP-Gal:betaGlcNAc beta 1,4- galactosyltransferase, polypeptide 3	XM_416564	0.137814	0.108873	1.2113	1.2113	1.97172	1
GgaAffx.12914.1.S1_at	421480	SLC30A6	solute carrier family 30 (zinc transporter), member 6	NM_001006402	0.111926	0.056583	1.21122	1.21122	2.15105	1
Gga.8114.1.S1_at	---	---	---	---	0.805776	0.479476	1.21122	1.21122	0.400749	1
GgaAffx.5884.1.S1_s_at	423250	RBM25	RNA binding motif protein 25	XM_421170	0.0314432	0.00403581	1.21114	1.21114	3.29623	1
GgaAffx.26537.4.S1_s_at	423755	NOLC1	nucleolar and coiled-body phosphoprotein 1	XM_421630	0.120326	0.0927333	1.21112	1.21112	2.08848	1
Gga.11704.1.S1_at	424757	UGCGL1	UDP-glucose ceramide glucosyltransferase-like 1	XM_422579	0.0811832	0.0801359	1.21101	1.21101	2.43168	1
GgaAffx.20579.1.S1_s_at	426574	NOL5A	nucleolar protein 5A (56kDa with KKE/D repeat)	NM_001031388	0.241196	0.036245	1.21099	1.21099	1.49556	1
Gga.11646.1.S1_s_at	417439	FAM20A	family with sequence similarity 20, member A	XM_415690	0.603862	0.118812	1.21093	1.21093	0.695542	1
GgaAffx.24553.1.S1_at	421745	DSE	dermatan sulfate epimerase	XM_419777	0.307462	0.0746376	1.21089	1.21089	1.28966	1
AF243438.CDS29.S1_s_at	---	---	---	---	0.216593	0.0378822	1.21087	1.21087	1.58669	1
GgaAffx.1813.1.S1_at	424003	C2orf21	chromosome 2 open reading frame 21	XM_421859	0.13233	0.218274	1.21084	1.21084	2.00658	1
Gga.10199.1.S1_s_at	415724	TOX3	TOX high mobility group box family member 3	XM_414090	0.126274	0.0481938	1.21084	1.21084	2.04688	1
GgaAffx.22343.1.S1_s_at	420500	ARHGAP21	Rho GTPase activating protein 21	NM_001177357 /// XM_418602	0.0294419	0.00280215	1.21074	1.21074	3.35847	1
Gga.2172.2.S1_a_at	395478	PPP1R12B	protein phosphatase 1, regulatory (inhibitor) subunit 12B	NM_204727	0.398602	0.332414	1.21069	1.21069	1.06725	1
GgaAffx.5630.2.S1_s_at	423225	SPTBN5	spectrin, beta, non-erythrocytic 5	XM_421149	0.212497	0.0305994	1.21069	1.21069	1.60287	1
[truncated: 36,536 more rows]
