# Supplementary material for: Visually induced changes in cytokine production in the chick choroid
Source: eLife. 2021 Oct 5;10:e70608. doi: 10.7554/eLife.70608 (PMC8612705; doi:10.7554/eLife.70608)
Supplement: Figure 3—figure supplement 1—source data 1. [file elife-70608-fig3-figsupp1-data1.xlsx]

## Sheet: Figure 3 - figure supplement 1
Figure 3 - figure supplement 1. IL-6 on Scleral Proteoglycan Synthesis
vehicle	IL-6
1730.6	2490
2011.2	3530.6
2866.4	2840
1786	1279.8
4510.8	2249.2
1596.2	5177.6
2925	4225.2
1239	2966.2
1211.2	2550.6
3311	3554.8
3586	3469.2
