# Supplementary material for: Visually induced changes in cytokine production in the chick choroid
Source: eLife. 2021 Oct 5;10:e70608. doi: 10.7554/eLife.70608 (PMC8612705; doi:10.7554/eLife.70608)
Supplement: Figure 3—source data 1. [file elife-70608-fig3-data1.xlsx]

## Sheet: Sheet1
Figure 3A. Results of Taqman (IL-6/GAPDH ∆∆C(t))
0 hr (10d FD)		0.75 hr		1.5 hr		3 hr		6 hr		12 hr		24 hr		4 day		8 day		normal	6 hr in dark
control	treated	control	treated	control	treated	control	treated	control	treated	control	treated	control	treated	control	treated	control	treated		control	treated
0.00036	0.00187	0.00239	0.00158	0.00039	0.0158	0.00085	0.01364	5e-05	0.00218	0.00059	0.00202	0.00031	0.00501	0.00247	0.0013	0.00081	0.00863	0.00436	7e-05	0.00018
0.00029	0.0003	0.00278	0.00184	0.00041	0.0023	0.00074	0.00138	0.00085	0.00709	0.01223	0.02544	0.00056	0.00955	0.00228	0.00176	0.00048	0.00178	0.00031	0.00029	7e-05
0.00043	0.00017	0.0004	0.0012	0.00033	0.02284	0.00087	0.00479	0.0007	0.00945	0.0002	0.004	0.00031	0.01211	0.00079	0.00203	0.00015	0.00089	0.00018	0.00021	0.00028
0.00071	0.0006	0.0008	0.0033	0.00026	0.00324	0.0007	0.05966	0.00077	0.01174	0.00024	0.0383	0.00058	0.00353	0.00057	0.00475	0.00029	0.00077	0.00469	9e-05	0.00013
0.00054	0.0004	0.00154	0.00098	0.00027	0.00062	0.00086	0.00493	0.00243	0.01164	0.00019	0.07589	0.0003	0.00767	0.00044	0.00339	0.00014	0.00122	0.00112	9e-05	0.00023
2e-05	0.00066	0.00223	0.00547	0.00035	0.00331	0.00248	0.00256	0.00244	0.0008	0.00024	0.00577	0.00057	0.00581	0.00089	0.00174	0.00094	0.00115	0.00088	0.00019	0.00023
		0.00469	0.00423			1e-05	0.00905	0.00052	0.03137	0.00057	0.00924	0.0007	0.00634	0.00079	0.00085	0.00022	0.00077	0.00069
		0.00039	0.01254			1e-05	0.00042	0.00184	0.00262	0.00056	0.00143	0.00085	0.01868	0.00043	0.0009	0.00023	0.00066	0.00311
		0.00045	0.00143			0.00071	0.00247	0.02651	0.03693	0.00023	0.00189	0.00126	0.00318	0.00223	0.00117	0.0156	0.00562	0.00018
						0.0001	0.00129	0.00161	0.02324	0.00075	0.01226	0.00088	0.00213	0.00024	0.00287	0.00029	0.0005	7e-05
						0.0004	0.02196			0.00028	0.00149	0.00041	0.00827					0.00028
						0.00028	0.00247			0.00052	0.00081	0.00637	0.00602					0.00013
										0.00035	0.00081							0.00023
										0.00037	0.00103							0.00023
										0.00014	0.00134
										0.00131	0.00037

## Sheet: Sheet2
Figure 3B. IL-6 protein expression (total pg/punch)
6 hrs recovery		24 hrs recovery
control	recovery	control	recovery
113.672	101.628	140.75	95.6884
115.094	168.2	141.735	109.97
100.648	159.254	100.367	84.1153
119.456	213.498	75.4969	101.352
90.88	200.79	126.715	105.046
127.264	122.965	147.152	78.2055
122.997	138.707	132.132	93.2261
119.014	73.716	93.9648	110.463
60.597	86.992	60.4763	48.4106
54.054	127.549	77.4668	96.1809
52.853	81.682	124.252	134.102
101.154	127.201	70.0796	72.7882
132.796	138.233	178.179	66.8785
107.097	131.184	55.5515	39.2997
132.859	117.18	51.3654	78.9442
120.689	167.726	95.4422	105.538

## Sheet: Sheet3
Figure 3C. Results of Taqman (IFNG/GAPDH, IL-1B/GAPDH, TNF-α/GAPDH ∆∆C(t))
IFNG		1.5 hr IL-1B		3.0 hr IL-1B		IL-1β (6 hr)		TNF-α (6 hr)
control	recovery	control	recovery	control	recovery	control	recovery	control	recovery
4e-05	6e-05	0.00145	0.00091	0.00356	0.0019	0.00031	0.00135	0.03232	0.02916
0.00012	0.00022	0.00077	0.00018	0.00242	0.00346	0.00059	0.00085	0.03367	0.00271
9e-05	0.00019	0.0007	0.00106	0.00151	0.00169	0.00041	0.00369	0.01448	0.00967
0.0003	0.00035	0.00065	0.00065	0.00121	0.0017	0.00121	0.00207	0.01702	0.00859
0.00045	0.00073	0.00056	0.00051	0.00282	0.00107	0.0013	0.00142	0.02028	0.02909
0.00018	0.0001	0.00037	0.00031	0.00439	0.00139	0.00129	0.00116	0.01879	0.01381
0.00015	9e-05					0.00055	0.00164	0.00953	0.01497
0.00054	0.00024					0.00072	0.00215	0.01131	0.01479
						0.0018	0.00197	0.0277	0.02458
						0.00055	0.00128	0.01482	0.01424
								0.01329	0.01765
