# Supplementary material for: Visually induced changes in cytokine production in the chick choroid
Source: eLife. 2021 Oct 5;10:e70608. doi: 10.7554/eLife.70608 (PMC8612705; doi:10.7554/eLife.70608)
Supplement: Figure 4—figure supplement 1—source data 1. [file elife-70608-fig4-figsupp1-data1.xlsx]

## Sheet: Figure 4 - figure supplement 1
Figure 4 - figure supplement 1: Spectra of LED light sources as a function of wavelength.
RED			BLUE			WHITE
Wavelength (nm)	Spectral Irradiance [mW/m2/nm]		Wavelength (nm)	Spectral Irradiance [mW/m2/nm]		Wavelength (nm)	Spectral Irradiance [mW/m2/nm]
380	0.006123		380	0.009543		380	0.023388
381	0.00382		381	0.007078		381	0.028766
382	0.00186		382	0.00327		382	0.029474
383	0.001581		383	0.003159		383	0.03219
384	0.00019		384	0.000529		384	0.025683
385	0		385	0		385	0.022634
386	0		386	0		386	0.018739
387	0		387	0		387	0.017234
388	0.000313		388	0.000904		388	0.016989
389	0.000512		389	0.001578		389	0.021226
390	0.000502		390	0.001879		390	0.022118
391	0.001501		391	0.007833		391	0.025327
392	0.001909		392	0.009006		392	0.020726
393	0.004364		393	0.012176		393	0.024053
394	0.003911		394	0.007837		394	0.025169
395	0.002798		395	0.004213		395	0.02355
396	0.001404		396	0.002382		396	0.025293
397	0		397	0.000293		397	0.022046
398	0.000228		398	0.001146		398	0.020782
399	0.000391		399	0.00223		399	0.019545
400	0.000547		400	0.00252		400	0.017981
401	0.000558		401	0.001977		401	0.020059
402	0.001977		402	0.001166		402	0.02537
403	0.001813		403	0.000736		403	0.025728
404	0.001802		404	0.000731		404	0.023515
405	0.00036		405	0.000301		405	0.018581
406	0		406	0		406	0.016345
407	0		407	0		407	0.020065
408	0		408	4.6e-05		408	0.025634
409	8e-06		409	0.000187		409	0.033506
410	1.2e-05		410	0.000543		410	0.041797
411	1.2e-05		411	0.001508		411	0.0482
412	0.000471		412	0.002142		412	0.051534
413	0.00193		413	0.003544		413	0.061848
414	0.002016		414	0.002951		414	0.072533
415	0.002147		415	0.002931		415	0.087086
416	0.005123		416	0.006445		416	0.104316
417	0.013409		417	0.018401		417	0.134684
418	0.013345		418	0.018879		418	0.156789
419	0.011148		419	0.017681		419	0.184567
420	0.001163		420	0.007494		420	0.212341
421	0.000284		421	0.004821		421	0.258513
422	0.002462		422	0.009789		422	0.321448
423	0.004301		423	0.013622		423	0.395114
424	0.004363		424	0.015447		424	0.486272
425	0.00313		425	0.014404		425	0.587549
426	0.000234		426	0.011108		426	0.708359
427	0		427	0.010369		427	0.855372
428	0		428	0.012674		428	1.03221
429	0		429	0.019106		429	1.25947
430	0		430	0.032141		430	1.49523
431	0		431	0.043629		431	1.75811
432	0		432	0.051155		432	2.05228
433	0.001227		433	0.061914		433	2.38201
434	0.003085		434	0.077418		434	2.7463
435	0.003067		435	0.094023		435	3.14951
436	0.002467		436	0.105083		436	3.66459
437	0		437	0.118675		437	4.20431
438	0		438	0.148183		438	4.80029
439	0		439	0.193258		439	5.44826
440	0.000576		440	0.247256		440	6.16985
441	0.000681		441	0.302694		441	7.01119
442	0.000677		442	0.368743		442	7.97321
443	0.000236		443	0.450598		443	9.17015
444	0.000633		444	0.537618		444	10.3303
445	0.000631		445	0.632829		445	11.5823
446	0.000627		446	0.744151		446	12.8696
447	0.000258		447	0.876147		447	14.2285
448	0		448	1.02764		448	15.5377
449	0.000735		449	1.20286		449	16.7018
450	0.003503		450	1.39552		450	17.5423
451	0.004663		451	1.61577		451	18.1504
452	0.004286		452	1.88162		452	18.446
453	0.001888		453	2.15747		453	18.453
454	0		454	2.46355		454	18.0759
455	0		455	2.80326		455	17.3808
456	0		456	3.15879		456	16.4099
457	0		457	3.52043		457	15.3012
458	0		458	3.86948		458	14.1194
459	0		459	4.19776		459	13.0092
460	0		460	4.49486		460	12.0365
461	0		461	4.74902		461	11.1186
462	0		462	4.88697		462	10.4207
463	0		463	4.91747		463	9.85171
464	0		464	4.8599		464	9.39642
465	0		465	4.71813		465	9.04395
466	0		466	4.51564		466	8.76016
467	0		467	4.22347		467	8.43289
468	0		468	3.8843		468	8.08252
469	0		469	3.52531		469	7.70421
470	0		470	3.12948		470	7.25112
471	0		471	2.80878		471	6.83697
472	0.000564		472	2.52167		472	6.40883
473	0.001177		473	2.27837		473	6.02366
474	0.002713		474	2.075		474	5.68681
475	0.003221		475	1.9048		475	5.39429
476	0.002159		476	1.75387		476	5.13706
477	0.00131		477	1.62007		477	4.92005
478	7e-05		478	1.49482		478	4.76331
479	0.000187		479	1.38631		479	4.66407
480	0.000187		480	1.28168		480	4.62189
481	0.000187		481	1.17725		481	4.61325
482	5e-06		482	1.06358		482	4.62958
483	0		483	0.93824		483	4.66067
484	0		484	0.835959		484	4.71123
485	0		485	0.740332		485	4.77436
486	0		486	0.657494		486	4.84635
487	4.8e-05		487	0.581763		487	4.92893
488	4.8e-05		488	0.5099		488	5.02405
489	4.8e-05		489	0.448452		489	5.13597
490	1.2e-05		490	0.388757		490	5.2615
491	0.000245		491	0.346789		491	5.39128
492	0.001821		492	0.313174		492	5.54953
493	0.00181		493	0.281594		493	5.71796
494	0.001803		494	0.254832		494	5.90736
495	0.001065		495	0.228415		495	6.10769
496	0.001427		496	0.210808		496	6.31557
497	0.001424		497	0.190644		497	6.53572
498	0.001318		498	0.168673		498	6.75354
499	0.00136		499	0.146411		499	6.96876
500	0.003004		500	0.13514		500	7.18106
501	0.00309		501	0.125496		501	7.39072
502	0.003452		502	0.119804		502	7.59974
503	0.000824		503	0.103932		503	7.81878
504	0.000906		504	0.091487		504	8.05217
505	0.000381		505	0.078458		505	8.26981
506	0.000324		506	0.070425		506	8.46648
507	0.000244		507	0.059049		507	8.65783
508	0		508	0.046338		508	8.84079
509	0		509	0.041688		509	9.01236
510	0		510	0.040284		510	9.17396
511	0		511	0.040662		511	9.32583
512	0		512	0.034902		512	9.49379
513	0		513	0.025389		513	9.6573
514	0.000132		514	0.022449		514	9.8014
515	0.001285		515	0.029023		515	9.91925
516	0.001293		516	0.030446		516	10.0318
517	0.001293		517	0.029281		517	10.1514
518	0.000394		518	0.017517		518	10.2794
519	0		519	0.011974		519	10.3963
520	0		520	0.009366		520	10.5065
521	0		521	0.008128		521	10.6154
522	0.000466		522	0.007447		522	10.707
523	0.000839		523	0.010199		523	10.7692
524	0.000837		524	0.011415		524	10.8367
525	0.000645		525	0.010655		525	10.9178
526	2.5e-05		526	0.006405		526	11.0209
527	0		527	0.005737		527	11.1206
528	0		528	0.005711		528	11.2041
529	0		529	0.003959		529	11.2849
530	0		530	0.001416		530	11.3635
531	0		531	0.000468		531	11.4257
532	0		532	0.000536		532	11.4675
533	0		533	0.001594		533	11.5086
534	0.000651		534	0.002907		534	11.5618
535	0.000724		535	0.003175		535	11.6358
536	0.000723		536	0.002785		536	11.717
537	0.000355		537	0.003664		537	11.7905
538	0.000564		538	0.005867		538	11.8603
539	0.000818		539	0.00971		539	11.9222
540	0.000768		540	0.008381		540	11.9843
541	0.001091		541	0.008767		541	12.0431
542	0.001275		542	0.008516		542	12.1068
543	0.004022		543	0.014597		543	12.168
544	0.005451		544	0.018425		544	12.2328
545	0.005818		545	0.018396		545	12.2976
546	0.004953		546	0.015179		546	12.3704
547	0.00314		547	0.009594		547	12.4544
548	0.003103		548	0.008068		548	12.5384
549	0.001944		549	0.007647		549	12.6136
550	0.001826		550	0.010753		550	12.6787
551	0.00109		551	0.009268		551	12.7583
552	0.000369		552	0.006643		552	12.8399
553	0.000493		553	0.002442		553	12.9351
554	0.000493		554	0.001664		554	13.0235
555	0.000475		555	0.002194		555	13.1018
556	0.000228		556	0.002268		556	13.1701
557	0.000228		557	0.003098		557	13.2327
558	0.000229		558	0.003801		558	13.3074
559	0.000147		559	0.00349		559	13.386
560	0.000148		560	0.00393		560	13.4743
561	0.000212		561	0.00423		561	13.5591
562	0.000151		562	0.003036		562	13.6559
563	0.000152		563	0.001981		563	13.7504
564	0.000275		564	0.001466		564	13.8351
565	0.000623		565	0.001866		565	13.9176
566	0.002705		566	0.004414		566	14.0105
567	0.005061		567	0.006158		567	14.0908
568	0.005616		568	0.005682		568	14.1665
569	0.006206		569	0.006727		569	14.2204
570	0.004639		570	0.006919		570	14.2879
571	0.003983		571	0.006421		571	14.3591
572	0.002593		572	0.004703		572	14.4435
573	0.000975		573	0.001405		573	14.5308
574	0		574	0		574	14.6209
575	0		575	0		575	14.7186
576	9.4e-05		576	6e-06		576	14.8013
577	0.00285		577	0.001619		577	14.8659
578	0.005718		578	0.002294		578	14.9157
579	0.007984		579	0.003321		579	14.9668
580	0.009011		580	0.003558		580	15.0239
581	0.006586		581	0.002182		581	15.0809
582	0.005407		582	0.001942		582	15.1252
583	0.004639		583	0.000413		583	15.162
584	0.013625		584	0.004448		584	15.205
585	0.02498		585	0.00775		585	15.2504
586	0.038903		586	0.01217		586	15.3117
587	0.043418		587	0.011022		587	15.3872
588	0.043086		588	0.007973		588	15.4326
589	0.040387		589	0.00433		589	15.4789
590	0.039341		590	0.00245		590	15.4955
591	0.039991		591	0.00157		591	15.5109
592	0.049106		592	0.000954		592	15.5251
593	0.056533		593	0		593	15.5434
594	0.07409		594	0.000167		594	15.5539
595	0.089711		595	0.000538		595	15.562
596	0.104792		596	0.000763		596	15.5595
597	0.128375		597	0.001689		597	15.5272
598	0.153643		598	0.00121		598	15.4985
599	0.186846		599	0.001787		599	15.4696
600	0.222949		600	0.004441		600	15.4366
601	0.25895		601	0.005746		601	15.3809
602	0.295785		602	0.005749		602	15.3217
603	0.339415		603	0.003049		603	15.2631
604	0.392953		604	0.000362		604	15.2041
605	0.456138		605	0.00044		605	15.1551
606	0.535913		606	0.003003		606	15.0872
607	0.616722		607	0.00332		607	15.0207
608	0.703964		608	0.003316		608	14.9443
609	0.811003		609	0.004751		609	14.8356
610	0.945321		610	0.008847		610	14.723
611	1.11263		611	0.021197		611	14.6176
612	1.25914		612	0.021143		612	14.5386
613	1.43049		613	0.018033		613	14.4349
614	1.61597		614	0.01111		614	14.3094
615	1.82764		615	0.006483		615	14.1731
616	2.06911		616	0.006485		616	14.0363
617	2.32994		617	0.002166		617	13.8832
618	2.61551		618	0.001341		618	13.7327
619	2.89544		619	0.001608		619	13.5935
620	3.22992		620	0.005144		620	13.4475
621	3.57677		621	0.006738		621	13.3018
622	3.94059		622	0.008582		622	13.1531
623	4.31179		623	0.006207		623	12.9886
624	4.66438		624	0.005052		624	12.8321
625	5.08653		625	0.003281		625	12.6444
626	5.53019		626	0.002627		626	12.4563
627	5.97866		627	0.00236		627	12.2701
628	6.39907		628	0.00067		628	12.0885
629	6.74733		629	0.000781		629	11.8939
630	6.98097		630	0.004369		630	11.6839
631	7.04366		631	0.009499		631	11.5059
632	6.89452		632	0.009958		632	11.2869
633	6.52846		633	0.008773		633	11.079
634	5.96252		634	0.001792		634	10.8833
635	5.26921		635	0.000453		635	10.683
636	4.60218		636	0.000445		636	10.5172
637	3.8639		637	0.004083		637	10.3113
638	3.1883		638	0.006333		638	10.1025
639	2.61851		639	0.008557		639	9.89648
640	2.14515		640	0.006378		640	9.68568
641	1.79943		641	0.003575		641	9.49624
642	1.48863		642	0.000647		642	9.28708
643	1.23708		643	0		643	9.09102
644	1.02584		644	0		644	8.88428
645	0.84177		645	6e-06		645	8.67169
646	0.677523		646	1.2e-05		646	8.45857
647	0.539015		647	1.2e-05		647	8.25008
648	0.433296		648	1.2e-05		648	8.07933
649	0.343156		649	0.000428		649	7.87883
650	0.277342		650	0.001796		650	7.68345
651	0.223023		651	0.002155		651	7.48683
652	0.183431		652	0.004834		652	7.30224
653	0.141574		653	0.003493		653	7.12461
654	0.105839		654	0.003116		654	6.92972
655	0.070631		655	0.001184		655	6.73135
656	0.046381		656	0		656	6.57135
657	0.039514		657	0.003259		657	6.40234
658	0.040046		658	0.007017		658	6.23057
659	0.034635		659	0.007053		659	6.05993
660	0.028356		660	0.006035		660	5.87865
661	0.017956		661	0.000825		661	5.73108
662	0.014267		662	0.000297		662	5.56654
663	0.014768		663	0.000548		663	5.39863
664	0.011075		664	0.000418		664	5.22566
665	0.012164		665	0.001394		665	5.05626
666	0.011198		666	0.001168		666	4.91069
667	0.005982		667	0.001131		667	4.75052
668	0.003337		668	0.000842		668	4.5964
669	0.004543		669	0.000933		669	4.45041
670	0.008283		670	0.002843		670	4.31424
671	0.008987		671	0.00305		671	4.19346
672	0.006771		672	0.002643		672	4.05444
673	0.00687		673	0.005178		673	3.92022
674	0.005433		674	0.005507		674	3.80131
675	0.00897		675	0.006936		675	3.66827
676	0.008503		676	0.006081		676	3.53091
677	0.004716		677	0.002737		677	3.40055
678	0.001981		678	0.002257		678	3.28062
679	0.000528		679	0.001607		679	3.18005
680	0.000455		680	0.001319		680	3.05215
681	0		681	0		681	2.91741
682	0		682	0		682	2.81044
683	0		683	0		683	2.69895
684	0		684	0		684	2.60027
685	0.001263		685	0		685	2.50146
686	0.004091		686	0.001693		686	2.41273
687	0.006823		687	0.005442		687	2.33394
688	0.006518		688	0.005741		688	2.23798
689	0.005013		689	0.005775		689	2.13671
690	0.001894		690	0.002031		690	2.04556
691	0.00098		691	0.000479		691	1.94401
692	0.000989		692	0.000483		692	1.84595
693	0.000305		693	9.8e-05		693	1.75433
694	0.000338		694	0		694	1.6808
695	0.000341		695	0		695	1.61906
696	0.002013		696	0.001639		696	1.5538
697	0.00284		697	0.002462		697	1.48234
698	0.002782		698	0.002489		698	1.4143
699	0.0023		699	0.002018		699	1.34387
700	0.001838		700	0.001966		700	1.27731
701	0.00185		701	0.001979		701	1.22594
702	0.001864		702	0.001994		702	1.17362
703	0.004617		703	0.005236		703	1.12336
704	0.00565		704	0.008819		704	1.07942
705	0.005693		705	0.009105		705	1.01859
706	0.004457		706	0.007966		706	0.969604
707	0.000223		707	0.001211		707	0.901575
708	0		708	0		708	0.845656
709	0		709	0		709	0.814244
710	0		710	0		710	0.77436
711	0		711	0		711	0.719249
712	0		712	0		712	0.668578
713	0		713	0		713	0.620939
714	0		714	0		714	0.59184
715	0		715	0		715	0.578961
716	0		716	0.001641		716	0.565974
717	0		717	0.002941		717	0.544205
718	0		718	0.002963		718	0.513901
719	0.000399		719	0.004843		719	0.486366
720	0.001165		720	0.006155		720	0.457074
721	0.001176		721	0.006221		721	0.418721
722	0.001186		722	0.005997		722	0.386618
723	0.000219		723	0.001168		723	0.360749
724	6.7e-05		724	0.000497		724	0.3443
725	6.8e-05		725	0.000481		725	0.319564
726	6.8e-05		726	0.000623		726	0.305771
727	6.7e-05		727	0.001078		727	0.286446
728	0.000113		728	0.001613		728	0.286627
729	0.000114		729	0.001628		729	0.289249
730	0.000566		730	0.00139		730	0.280026
731	0.003873		731	0.005253		731	0.284026
732	0.009779		732	0.00773		732	0.286655
733	0.011803		733	0.007983		733	0.2803
734	0.009848		734	0.005745		734	0.258636
735	0.005489		735	0.000736		735	0.220125
736	0		736	0		736	0.182048
737	0		737	0		737	0.155374
738	0		738	0		738	0.147252
739	0		739	0		739	0.133098
740	0		740	0		740	0.116494
741	0		741	0		741	0.110679
742	0		742	0		742	0.108618
743	0		743	0		743	0.117781
744	0		744	0.000238		744	0.126034
745	0		745	0.000625		745	0.124664
746	0		746	0.000632		746	0.118362
747	0		747	0.000639		747	0.101673
748	0		748	6e-05		748	0.08479
749	0		749	0		749	0.076251
750	0		750	0		750	0.065007
751	0		751	0		751	0.06613
752	0		752	0		752	0.061894
753	0		753	0		753	0.068039
754	0		754	0		754	0.072125
755	0		755	0		755	0.060535
756	0		756	0		756	0.05239
757	0		757	0		757	0.046057
758	0		758	0		758	0.042248
759	0		759	0		759	0.045065
760	0		760	0		760	0.051122
761	0		761	0		761	0.054762
762	0		762	0		762	0.05408
763	0		763	0		763	0.055206
764	0.000327		764	0		764	0.056815
765	0.001491		765	0.001408		765	0.067778
766	0.005237		766	0.009471		766	0.078049
767	0.005399		767	0.010043		767	0.074595
768	0.004976		768	0.01005		768	0.054474
769	0.001881		769	0.004325		769	0.033648
770	0		770	0		770	0.01738
771	0		771	0		771	0.02633
772	0.000929		772	0.002673		772	0.0417
773	0.010429		773	0.011044		773	0.07369
774	0.015584		774	0.017988		774	0.088572
775	0.017142		775	0.020776		775	0.090185
776	0.023042		776	0.02836		776	0.10748
777	0.019567		777	0.026496		777	0.104553
778	0.019681		778	0.024878		778	0.106487
779	0.016099		779	0.018295		779	0.088844
780	0.000964		780	0.001143		780	0.053247
