# Supplementary material for: Visually induced changes in cytokine production in the chick choroid
Source: eLife. 2021 Oct 5;10:e70608. doi: 10.7554/eLife.70608 (PMC8612705; doi:10.7554/eLife.70608)
Supplement: Figure 4—source data 1. [file elife-70608-fig4-data1.xlsx]

## Sheet: Sheet1
Figure 4. Results of Taqman (IL-6/GAPDH ∆∆C(t)) Light Intensity Experiment
dark	low (5 lux)	medium (700 lux)	high(3150 lux)	red (58 lux)	blue (111 lux)
8e-05	0.00047	0.00115	0.00102	0.00049	0.00051
0.00028	0.00074	0.00051	0.00133	0.00147	0.00039
0.00021	0.00072	0.00188	0.00434	0.00048	0.00093
9e-05	0.00037	0.00094	0.00105	0.00365	0.0008
9e-05	0.00172	0.00167	0.00059	0.00052	0.00102
0.00019	0.00064	0.0011	0.00191	0.001	0.00115
0.00018	0.00092	0.00328	0.00087	0.00113	0.00408
7e-05	0.00086	0.01563	0.00083	0.00043	0.00063
0.00028	0.00104	0.00148	0.00122	0.00088	0.00042
0.00011	0.00084	0.00062	0.00107	0.00203	0.00175
0.00022	0.00081	0.00243	0.00273	0.00055	0.00063
0.00023	0.001	0.00074	0.00664	0.00148	0.00368
	0.00778	0.00139	0.00098	0.00712	0.00109
	0.0009	0.01893	0.00149	0.00082	0.00121
	0.00228	0.00245	0.00266	0.00147	0.00209
		0.00075		0.00034
		0.00089
