# Supplementary material for: Visually induced changes in cytokine production in the chick choroid
Source: eLife. 2021 Oct 5;10:e70608. doi: 10.7554/eLife.70608 (PMC8612705; doi:10.7554/eLife.70608)
Supplement: Figure 5—source data 1. [file elife-70608-fig5-data1.xlsx]

## Sheet: Fig. 5C
Figure 5C. Refractions of Chick Eyes with -15D and +15D Lenses in Place
- 15D Lens	No Lens	+ 15D Lens
12.1967	4.7775	-6.58286
11.8557	4.36667	-6.40909
11.439	4.13891	-6.108
11.21	3.74348	-5.10722
11.09	3.23889	-6.65
11.3235	2.815	-5.29853
11.456	2.89556	-5.64045
10.9597	2.85667	-4.69336
10.8835	3.86911	-6.396
10.6496	2.815	-6.658

## Sheet: Fig. 5D
Figure 5D. Results of Taqman (IL-6/GAPDH ∆∆C(t)) +15D /-15D Lens Experiment
Plus 15 Lens 6 hr		Plus 15 lens 24 hr		Minus 15 lens 24 hr		Normal Untreated
control	treated	control	treated	control	treated
0.00059	0.001	0.00015	0.00228	0.0034	0.00089	0.00436
0.00031	0.00079	0.01636	0.00922	0.0008	0.00103	0.00031
0.00011	0.0022	0.00112	0.00231	0.00458	0.00034	0.00018
0.00025	0.00022	0.00101	0.00244	0.00054	0.00041	0.00469
0.00275	0.00048	0.00047	0.04169	0.01167	0.00083	0.00112
0.00018	7e-05	0.00048	0.00169	0.00118	0.00049	0.00088
		0.00053	0.00644	0.00062	0.00053	0.00069
		0.00119		0.00051	0.00064	0.00311
		0.00028	0.00234	0.00129	0.00178
		0.00073	0.00083	0.00064	0.00041
		4e-05	0.00071	0.00181	0.0057
		0.00034	0.00184	0.00172	0.00229
		0.00078	0.00219	0.00184	0.00075
		0.00061	0.00485	0.00084	0.00074
		0.00094	0.00059	0.00071	0.00068
		0.00085	0.00076	0.00077	0.00082
		0.00035	0.0028	0.00065	0.00087
		0.00336	0.00393	0.0002	0.00038
		0.00107	0.01734	0.00098	0.00101
		0.00284	0.00387	0.00117	0.00092
		0.00086	0.00166	0.00112	0.00118
		0.00117	0.0043	0.00059	0.00153
		0.00124	0.00071	0.00077	0.00076
		0.00083	0.00103	0.00193	0.00053
		0.00077	0.00275		0.00113
		0.00052	0.00124	0.00061	0.00105
		0.00239	0.02992	0.00107	0.00084
				0.00075	0.00317
				0.00049	0.00057
				0.00065	0.00046
				0.0005	0.0004
				0.00041	0.00033
				0.00078	0.00082
				0.00124	0.0008

## Sheet: Fig. 5E
Figure 5E. Scleral Proteoglycan Synthesis after Lens treatment
Plus Lens		Minus Lens
control	treated	control	treated
7384.2	6620.8	17554.8	22300.6
18394.6	12751.8	19801	13767
14800.4	8995	9433.8	12805.4
11836.4	6369.6	14107.4	12788.6
10053.8	8180	17150.8	20656.4
20271.2	10289	13165.4	19943.4
16411.8	11596.2	21119.4	17745.4
17804.6	9250.2	10541.8	21992.2
14299.4	12395.8	6672.6	15937
13259.4	8886.6	14795.4	17637
		10665.2	16080
		10315.6	13680.6
		18605.4	18828.2
