# Supplementary material for: Visually induced changes in cytokine production in the chick choroid
Source: eLife. 2021 Oct 5;10:e70608. doi: 10.7554/eLife.70608 (PMC8612705; doi:10.7554/eLife.70608)
Supplement: Figure 6—source data 1. [file elife-70608-fig6-data1.xlsx]

## Sheet: Sheet1
Figure 6A. Results of L-NAME on IL-6 (Taqman IL-6/GAPDH ∆∆C(t))
Vehicle		L-NAME
control	recovering	control	recovering
0.00044	0.00381	0.00029	0.00238
0.00022	0.0104	0.00037	0.00114
0.00022	0.00222	0.00074	0.00213
0.00026	0.00645	0.00027	0.00353
0.00028	0.00442	0.00064	0.00093
0.00038	0.01672	0.00025	0.00149
0.00132	0.01478	0.001	0.00401

## Sheet: Sheet2
Figure 6B. Results of L-NAME on Scleral Proteoglycan Synthesis
10 days FD		12 hrs recovery -vehicle		12 hrs recovery L-NAME
control	recovery	control	recovery	control	recovery
39745.2	70717.6	24825.2	24072.6	12748	25275.2
37573.8	62736.2	39644.8	50847.2	21296	34393
35986.2	63131.8	21671.4	45428	27708.8	76812.2
26969.8	48763.8	27689.8	21737.6	23965.2	67780.2
46365.8	88910.8	34142.4	28694	18736.8	115199
38498	71002	37359.6	95328.4	27493.6	27668.6
42707.8	37681	30544.4	38366.8	27377.6	61737.6
33613.8	51003.2	15395	19249	15199.4	24819.5
33639.3	48396	9673.95	8823.15	25654.6	79127
39959.4	59709.1	17219	16758.4	22931	37252.1
31125.8	52142	16635.7	9947.53	16105.8	31832.5
30810.7	48374.2	48570.5	7661.8	12333.5	12387.5
34602.7	77528.5	7338.7	9186.4	12359.9	25497.3
38132.6	47368	10577	13129	12657.2	12910
31996.7	44094.3	8077.81	11697.6	11107	10711.1
27014.1	49600.5	9976.54	10457.7	17962.7	25406.5
		16549.5	32390.9	13682	38262.9
