# Supplementary material for: Visually induced changes in cytokine production in the chick choroid
Source: eLife. 2021 Oct 5;10:e70608. doi: 10.7554/eLife.70608 (PMC8612705; doi:10.7554/eLife.70608)
Supplement: Figure 7—source data 1. [file elife-70608-fig7-data1.xlsx]

## Sheet: Sheet1
Figure 7A. Results of PAPA-NONOate on IL-6 (Taqman IL-6/GAPDH ∆∆C(t))
0 mM	0.5 mM	1.0 mM	1.5 mM
0.02141	0.22819	0.50742	0.18402
0.08371	0.2291	0.2251	0.18353
0.0339	0.07112	0.37889	1.24875
0.13777	0.04461	0.07784	0.27824
0.09328		0.5122	0.46542

## Sheet: Sheet2
Figure 7B. Results of PAPA-NONOate on IL-6 protein in culture media (pg/ml)
0 mM	3 mM	5 mM
-26.5517	204.31	167.414
-25.8621	123.28	496.724
-41.0345	242.59	334.828
16.7241	32.586
7.93103	334.83

## Sheet: Sheet3
Figure 7C. Results of SB203580 and PAPA-NONOate on IL-6 (Taqman IL-6/GAPDH ∆∆C(t))
Control	PAPA (1.5 mM)	PAPA + SB203580
0.863055	1.72282	0.97942
1.23711	1.67646	0.70985
0.450925	1.84779	0.24435
0.583955	1.62456	0.92267
1.74396	2.14515	0.40681
1.09727	0.64509	0.5492
0.48774	5.36295	0.96513
2.13316	2.3832	0.36024
1.52055	5.73979	0.5868
1.57749	1.70401	0.8542
