# Supplementary material for: Visually induced changes in cytokine production in the chick choroid
Source: eLife. 2021 Oct 5;10:e70608. doi: 10.7554/eLife.70608 (PMC8612705; doi:10.7554/eLife.70608)
Supplement: Figure 8—source data 1. [file elife-70608-fig8-data1.xlsx]

## Sheet: Sheet1
Figure 8A. Results of L-arginine on IL-6 (Taqman IL-6/GAPDH ∆∆C(t))
no KCl		KCl (50 mM)
vehicle	L-arg (5 mM)	vehicle	L-arg (5 mM)
0.08282	0.24376	0.24997	0.95123
0.04269	0.11736	0.35984	0.49877
0.66987	0.15752	0.83787	0.55591
0.08563	0.26271	0.42434	0.51238
0.25286	0.20534	0.63146	0.72127
0.27329	0.39214	0.33713	1.47978
0.12714	0.11811	0.22464	1.55332
0.04862	0.21093	0.90651	1.62813
0.20281	0.33342	0.64233	0.99586

## Sheet: Sheet2
Figure 8B. Dose Response of L-arginine on IL-6 (Taqman IL-6/GAPDH ∆∆C(t))*
0	L-arg (0.05 mM)	L-arg (0.05 mM)	L-arg (5 mM)
0.06898	0.2628	0.0877	0.45516
0.26296	0.09066	0.1585	0.54296
0.44015	0.25032	0.15223	0.47945
0.83444	1.0338	2.97282	5.00949
0.79872	0.5397	0.39196	2.39665
0.37536	0.26408	0.4641	0.76938
0.20712	0.70595	0.39776	0.9654
0.24761	0.14067	0.55588	0.23569
0.28721	0.40111	0.57382	0.5316
*All samples are incubated with 50 mM KCl
