# Supplementary material for: Visually induced changes in cytokine production in the chick choroid
Source: eLife. 2021 Oct 5;10:e70608. doi: 10.7554/eLife.70608 (PMC8612705; doi:10.7554/eLife.70608)
Supplement: Figure 9—source data 1. [file elife-70608-fig9-data1.xlsx]

## Sheet: Sheet1
Figure 9A. Results of Intravitreal Atropine on IL-6 (Taqman IL-6/GAPDH ∆∆C(t))
vehicle		atropine
control	myopic	control	myopic
0.00041	0.00172	0.00069	0.00066
0.00065	0.00104	0.00028	0.00172
0.00067	0.00078	0.00076	0.01826
0.00035	0.00049	0.00041	0.00362
0.00063	0.00187	0.00104	0.00077
0.00479	0.00069	0.00075	0.00141
0.00129	0.00153	0.00067	0.00454
0.00093	0.00174	0.0007	0.01322
0.00071	0.00046	0.00051	0.00462
0.00044	0.00034	0.00107	0.00084
0.00119	0.00056	0.00047	0.00049
0.00052	0.00044	0.00046	0.00319
0.00066	0.00075	0.00075	0.00067
0.00029	0.00045	0.00032	0.00068
0.00018	0.00272	0.00059	0.00093
0.00047	0.00273	0.00052	0.00046
0.00166	0.00053	0.00052	0.00204
0.00054	0.00057	0.00038	0.00098

## Sheet: Sheet2
Figure 9B. Results of Atropine on Isolated Choroids (Taqman IL-6/GAPDH ∆∆C(t))
vehicle	atropine (0.1%)
0.0592	0.07453
0.01459	0.20851
0.0242	0.09405
0.04297	0.06803
0.01631	0.355
0.01564	0.03542
0.02005	0.1641
0.10588	0.14568
0.35036	0.24309
0.26786	0.29486
0.19898	0.28626
0.25206	0.44061
0.10435	0.34532
0.19675	0.1886
0.08442	0.42496
0.03808	0.2729

## Sheet: Sheet3
Figure 9C. Results of Atropine on IL-6 Protein in culture media ( pg/ml)
vehicle	atropine (0.1%)
27.8	91.7
4.3	18.7
12	41.1
18.7	23.1
75.2	63.3
5.7	41.7
30.7	63.3
8.9	42.2
0.2	5
0.2	9.6
